# Supplementary material
Source: PubMed Central journal article supplement (PMC4144992)
Supplement: NIHMS616629-supplement-Appendix_suppliers.pdf [file NIHMS616629-supplement-Appendix_suppliers.pdf]

# SELECTED SUPPLIERS OF REAGENTS AND EQUIPMENT

Listed below are addresses and phone numbers of commercial suppliers who have been recommended for particular items used in our manuals because: (1) the particular brand has actually been found to be of superior quality, or (2) the item is difficult to find in the marketplace. Consequently, this compilation may not include some important vendors of biological supplies. For comprehensive listings, see *Linscott's Directory of Immunological and Biological Reagents* (Santa Rosa, CA), *The Biotechnology Directory* (Stockton Press, New York), the annual Buyers' Guide supplement to the journal *Bio/Technology*, as well as various sites on the Internet.

## **A.C. Daniels**

72-80 Akeman Street  
Tring, Hertfordshire, HP23 6AJ, UK  
(44) 1442 826881  
FAX: (44) 1442 826880

## **A. EL. VIS GmbH**

Asternstrasse 47  
30167 Hanover, Germany  
(49) 511-6963-100  
FAX: (49) 511-6063-101  
<http://www.aelvis.net>

## **A.D. Instruments**

5111 Nations Crossing Road #8  
Suite 2  
Charlotte, NC 28217  
(704) 522-8415 FAX: (704) 527-5005  
<http://www.us.ensdress.com>

## **A.J. Buck**

11407 Cronhill Drive  
Owings Mill, MD 21117  
(800) 638-8673 FAX: (410) 581-1809  
(410) 581-1800  
<http://www.ajbuck.com>

## **A.M. Systems**

131 Business Park Loop  
P.O. Box 850  
Carlsborg, WA 98324  
(800) 426-1306 FAX: (360) 683-3525  
(360) 683-8300  
<http://www.a-msystems.com>

## **Aaron Medical Industries**

7100 30th Avenue North  
St. Petersburg, FL 33710  
(727) 384-2323 FAX: (727) 347-9144  
<http://www.aaronmed.com>

## **Abbott Laboratories**

100 Abbott Park Road  
Abbott Park, IL 60064  
(800) 323-9100 FAX: (847) 938-7424  
<http://www.abbott.com>

## **ABCO Dealers**

55 Church Street Central Plaza  
Lowell, MA 01852  
(800) 462-3326 (978) 459-6101  
<http://www.lomedco.com/abco.htm>

## **Aber Instruments**

5 Science Park  
Aberystwyth, Wales SY23 3AH, UK  
(44) 1970 636300  
FAX: (44) 1970 615455  
<http://www.aber-instruments.co.uk>

## **ABI Biotechnologies**

See Perkin-Elmer

## **ABI Biotechnology**

See Apotex

## **Access Technologies**

Subsidiary of Norfolk Medical  
7350 N. Ridgeway  
Skokie, IL 60076  
(877) 674-7131 FAX: (847) 674-7066  
(847) 674-7131  
<http://www.norfolkaccess.com>

## **Accurate Chemical and Scientific**

300 Shames Drive  
Westbury, NY 11590  
(800) 645-6264 FAX: (516) 997-4948  
(516) 333-2221  
<http://www.accuratechemical.com>

## **AccuScan Instruments**

5090 Trabue Road  
Columbus, OH 43228  
(800) 822-1344 FAX: (614) 878-3560  
(614) 878-6644  
<http://www.accuscan-usa.com>

## **AccuStandard**

125 Market Street  
New Haven, CT 06513  
(800) 442-5290 FAX: (877) 786-5287  
<http://www.accustandard.com>

## **Ace Glass**

1430 NW Boulevard  
Vineland, NJ 08360  
(800) 223-4524 FAX: (800) 543-6752  
(609) 692-3333

## **ACO Pacific**

2604 Read Avenue  
Belmont, CA 94002  
(650) 595-8588 FAX: (650) 591-2891  
<http://www.acopacific.com>

## **Acros Organic**

See Fisher Scientific

## **Action Scientific**

P.O. Box 1369  
Carolina Beach, NC 28428  
(910) 458-0401 FAX: (910) 458-0407

## **AD Instruments**

1949 Landings Drive  
Mountain View, CA 94043  
(888) 965-6040 FAX: (650) 965-9293  
(650) 965-9292  
<http://www.adinstruments.com>

## **Adaptive Biosystems**

15 Ribocoon Way  
Progress Park  
Luton, Bedfordshire LU4 9UR, UK  
(44)1 582-597676  
FAX: (44)1 582-581495  
<http://www.adaptive.co.uk>

## **Adobe Systems**

1585 Charleston Road  
P.O. Box 7900  
Mountain View, CA 94039  
(800) 833-6687 FAX: (415) 961-3769  
(415) 961-4400  
<http://www.adobe.com>

## **Advanced Bioscience Resources**

1516 Oak Street, Suite 303  
Alameda, CA 94501  
(510) 865-5872 FAX: (510) 865-4090

## **Advanced Biotechnologies**

9108 Guilford Road  
Columbia, MD 21046  
(800) 426-0764 FAX: (301) 497-9773  
(301) 470-3220  
<http://www.abionline.com>

## **Advanced ChemTech**

5609 Fern Valley Road  
Louisville, KY 40228  
(502) 969-0000  
<http://www.peptide.com>

## **Advanced Machining and Tooling**

9850 Businesspark Avenue  
San Diego, CA 92131  
(858) 530-0751 FAX: (858) 530-0611  
<http://www.amtmfg.com>

## **Advanced Magnetics**

See PerSeptive Biosystems

## **Advanced Process Supply**

See Naz-Dar-KC Chicago

## **Advanced Separation Technologies**

37 Leslie Court  
P.O. Box 297  
Whippany, NJ 07981  
(973) 428-9080 FAX: (973) 428-0152  
<http://www.astecusa.com>

## **Advanced Targeting Systems**

11175-A Flintkote Avenue  
San Diego, CA 92121  
(877) 889-2288 FAX: (858) 642-1989  
(858) 642-1988  
<http://www.ATSbio.com>

## **Advent Research Materials**

Eynsham, Oxford OX29 4JA, UK  
(44) 1865-884440  
FAX: (44) 1865-84460  
<http://www.advent-rm.com>

## **Advet**

Industrivagen 24  
S-972 54 Lulea, Sweden  
(46) 0920-211887  
FAX: (46) 0920-13773

## **Aesculap**

1000 Gateway Boulevard  
South San Francisco, CA 94080  
(800) 282-9000  
<http://www.aesculap.com>

## **Affinity Chromatography**

307 Huntingdon Road  
Girton, Cambridge CB3 0JX, UK  
(44) 1223 277192  
FAX: (44) 1223 277502  
<http://www.affinity-chrom.com>

## **Affinity Sensors**

See Labsystems Affinity Sensors

## **Affymetrix**

3380 Central Expressway  
Santa Clara, CA 95051  
(408) 731-5000 FAX: (408) 481-0422  
(800) 362-2447  
<http://www.affymetrix.com>

## **Agar Scientific**

66a Cambridge Road  
Stansted CM24 8DA, UK  
(44) 1279-813-519  
FAX: (44) 1279-815-106  
<http://www.agarscientific.com>

## **A/G Technology**

101 Hampton Avenue  
Needham, MA 02494  
(800) AGT-2535 FAX: (781) 449-5786  
(781) 449-5774  
<http://www.agtech.com>

## **Agen Biomedical Limited**

11 Durbell Street  
P.O. Box 391  
Acacia Ridge 4110  
Brisbane, Australia  
61-7-3370-6300  
FAX: 61-7-3370-6370  
<http://www.agen.com>

**Agilent Technologies**

395 Page Mill Road  
P.O. Box 10395  
Palo Alto, CA 94306  
(650) 752-5000  
<http://www.agilent.com/chem>

**Agouron Pharmaceuticals**

10350 N. Torrey Pines Road  
La Jolla, CA 92037  
(858) 622-3000 FAX: (858) 622-3298  
<http://www.agouron.com>

**Agracetus**

8520 University Green  
Middleton, WI 53562  
(608) 836-7300 FAX: (608) 836-9710  
<http://www.monsanto.com>

**AIDS Research and Reference**

Reagent Program  
U.S. Department of Health and Human Services  
625 Lofstrand Lane  
Rockville, MD 20850  
(301) 340-0245 FAX: (301) 340-9245  
<http://www.aidsreagent.org>

**AIN Plastics**

249 East Sanford Boulevard  
P.O. Box 151  
Mt. Vernon, NY 10550  
(914) 668-6800 FAX: (914) 668-8820  
<http://www.tincna.com>

**Air Products and Chemicals**

7201 Hamilton Boulevard  
Allentown, PA 18195  
(800) 345-3148 FAX: (610) 481-4381  
(610) 481-6799  
<http://www.airproducts.com>

**ALA Scientific Instruments**

1100 Shames Drive  
Westbury, NY 11590  
(516) 997-5780 FAX: (516) 997-0528  
<http://www.alascience.com>

**Aladin Enterprises**

1255 23rd Avenue  
San Francisco, CA 94122  
(415) 468-0433 FAX: (415) 468-5607

**Aladdin Systems**

165 Westridge Drive  
Watsonville, CA 95076  
(831) 761-6200 FAX: (831) 761-6206  
<http://www.aladdinsys.com>

**Alcide**

8561 154th Avenue NE  
Redmond, WA 98052  
(800) 543-2133 FAX: (425) 861-0173  
(425) 882-2555  
<http://www.alcide.com>

**Aldrich Chemical**

P.O. Box 2060  
Milwaukee, WI 53201  
(800) 558-9160 FAX: (800) 962-9591  
(414) 273-3850 FAX: (414) 273-4979  
<http://www.aldrich.sial.com>

**Alexis Biochemicals**

6181 Cornerstone Court East  
Suite 103  
San Diego, CA 92121  
(800) 900-0065 FAX: (858) 658-9224  
(858) 658-0065  
<http://www.alexis-corp.com>

**Alfa Aesar**

30 Bond Street  
Ward Hill, MA 01835  
(800) 343-0660 FAX: (800) 322-4757  
(978) 521-6300 FAX: (978) 521-6350  
<http://www.alfa.com>

**Alfa Laval**

Avenue de Ble 5 -Bazellaan 5  
BE-1140 Brussels, Belgium  
32(2) 728 3811  
FAX: 32(2) 728 3917 or 32(2) 728 3985  
<http://www.alfalaval.com>

**Alice King Chatham Medical Arts**

11915-17 Inglewood Avenue  
Hawthorne, CA 90250  
(310) 970-1834 FAX: (310) 970-0121  
(310) 970-1063

**Allegiance Healthcare**

800-964-5227  
<http://www.allegiance.net>

**Allelix Biopharmaceuticals**

6850 Gorway Drive  
Mississauga, Ontario  
L4V 1V7 Canada  
(905) 677-0831 FAX: (905) 677-9595  
<http://www.allelix.com>

**Allentown Caging Equipment**

Route 526, P.O. Box 698  
Allentown, NJ 08501  
(800) 762-CAGE  
FAX: (609) 259-0449  
(609) 259-7951  
<http://www.acecaging.com>

**Alltech Associates**

Applied Science Labs  
2051 Waukegan Road  
P.O. Box 23  
Deerfield, IL 60015  
(800) 255-8324 FAX: (847) 948-1078  
(847) 948-8600  
<http://www.alltechweb.com>

**Alomone Labs**

HaMarpeh 5  
P.O. Box 4287  
Jerusalem 91042, Israel  
972-2-587-2202  
FAX: 972-2-587-1101  
US: (800) 791-3904  
FAX: (800) 791-3912  
<http://www.alomone.com>

**Alpha Innotech**

14743 Catalina Street  
San Leandro, CA 94577  
(800) 795-5556 FAX: (510) 483-3227  
(510) 483-9620  
<http://www.alphainnotech.com>

**Altec Plastics**

116 B Street  
Boston, MA 02127  
(800) 477-8196 FAX: (617) 269-8484  
(617) 269-1400

**Alza**

1900 Charleston Road P.O. Box 7210  
Mountain View, CA 94043  
(800) 692-2990 FAX: (650) 564-7070  
(650) 564-5000  
<http://www.alza.com>

**Alzet**

c/o Durect Corporation  
P.O. Box 530  
10240 Bubb Road  
Cupertino, CA 95015  
(800) 692-2990 FAX: (408) 865-1406  
(408) 367-4036  
<http://www.alzet.com>

**Amac**

160B Larrabee Road  
Westbrook, ME 04092  
(800) 458-5060 FAX: (207) 854-0116  
(207) 854-0426

**Amaresco**

30175 Solon Industrial Parkway  
Solon, Ohio 44139  
(800) 366-1313 FAX: (440) 349-1182  
(440) 349-1313

**Ambion**

2130 Woodward Street, Suite 200  
Austin, TX 78744  
(800) 888-8804 FAX: (512) 651-0190  
(512) 651-0200  
<http://www.ambion.com>

**American Association of Blood**

**Banks**  
College of American Pathologists  
325 Waukegan Road  
Northfield, IL 60093  
(800) 323-4040 FAX: (847) 8166  
(847) 832-7000  
<http://www.cap.org>

**American Bio-Technologies**

See Intracel Corporation

**American Bioanalytical**

15 Erie Drive  
Natick, MA 01760  
(800) 443-0600 FAX: (508) 655-2754  
(508) 655-4336  
<http://www.americanbio.com>

**American Cyanamid**

P.O. Box 400  
Princeton, NJ 08543  
(609) 799-0400 FAX: (609) 275-3502  
<http://www.cyanamid.com>

**American HistoLabs**

7605-F Airport Road  
Gaithersburg, MD 20879  
(301) 330-1200 FAX: (301) 330-6059

**American International Chemical**

17 Strathmore Road  
Natick, MA 01760  
(800) 238-0001 (508) 655-5805  
<http://www.aicma.com>

**American Laboratory Supply**

See American Bioanalytical

**American Medical Systems**

10700 Bren Road West  
Minnetonka, MN 55343  
(800) 328-3881 FAX: (612) 930-6654  
(612) 933-4666  
<http://www.visitams.com>

**American Qualex**

920-A Calle Negocio  
San Clemente, CA 92673  
(949) 492-8298 FAX: (949) 492-6790  
<http://www.americanqualex.com>

**American Radiolabeled Chemicals**

11624 Bowling Green  
St. Louis, MO 63146  
(800) 331-6661 FAX: (800) 999-9925  
(314) 991-4545 FAX: (314) 991-4692  
<http://www.arc-inc.com>

**American Scientific Products**

See VWR Scientific Products

**American Society for  
Histocompatibility and  
Immunogenetics**

P.O. Box 15804  
Lenexa, KS 66285  
(913) 541-0009 FAX: (913) 541-0156  
[http://www.swmed.edu/home\\_pages/ASHI/ashi.htm](http://www.swmed.edu/home_pages/ASHI/ashi.htm)

**American Type Culture Collection  
(ATCC)**

10801 University Boulevard  
Manassas, VA 20110  
(800) 638-6597 FAX: (703) 365-2750  
(703) 365-2700  
<http://www.atcc.org>

**Amersham**

See Amersham Pharmacia Biotech

**Amersham International**

Amersham Place  
Little Chalfont, Buckinghamshire  
HP7 9NA, UK  
(44) 1494-544100  
FAX: (44) 1494-544350  
<http://www.apbiotech.com>

**Amersham Medi-Physics**

Also see Nycomed Amersham  
3350 North Ridge Avenue  
Arlington Heights, IL 60004  
(800) 292-8514 FAX: (800) 807-2382  
<http://www.nycomed-amersham.com>

**Amersham Pharmacia Biotech**  
800 Centennial Avenue  
P.O. Box 1327  
Piscataway, NJ 08855  
(800) 526-3593 FAX: (877) 295-8102  
(732) 457-8000  
<http://www.apbiotech.com>

**Amgen**  
1 Amgen Center Drive  
Thousand Oaks, CA 91320  
(800) 926-4369 FAX: (805) 498-9377  
(805) 447-5725  
<http://www.amgen.com>

**Amicon**  
Scientific Systems Division  
72 Cherry Hill Drive  
Beverly, MA 01915  
(800) 426-4266 FAX: (978) 777-6204  
(978) 777-3622  
<http://www.amicon.com>

**Amika**  
8980F Route 108  
Oakland Center  
Columbia, MD 21045  
(800) 547-6766 FAX: (410) 997-7104  
(410) 997-0100  
<http://www.amika.com>

**Amoco Performance Products**  
See BPAmoco

**AMPI**  
See Pacer Scientific

**Amrad**  
See Zenyth Therapeutics Limited

**Amresco**  
30175 Solon Industrial Parkway  
Solon, OH 44139  
(800) 829-2805 FAX: (440) 349-1182  
(440) 349-1199

**Anachemia Chemicals**  
3 Lincoln Boulevard  
Rouses Point, NY 12979  
(800) 323-1414 FAX: (518) 462-1952  
(518) 462-1066  
<http://www.anachemia.com>

**Ana-Gen Technologies**  
4015 Fabian Way  
Palo Alto, CA 94303  
(800) 654-4671 FAX: (650) 494-3893  
(650) 494-3894  
<http://www.ana-gen.com>

**Analox Instruments USA**  
P.O. Box 208  
Lunenburg, MA 01462  
(978) 582-9368 FAX: (978) 582-9588  
<http://www.analox.com>

**Analytical Biological Services**  
Cornell Business Park 701-4  
Wilmington, DE 19801  
(800) 391-2391 FAX: (302) 654-8046  
(302) 654-4492  
<http://www.ABSbioreagents.com>

**Analytical Genetics Testing Center**  
7808 Cherry Creek S. Drive, Suite 201  
Denver, CO 80231  
(800) 204-4721 FAX: (303) 750-2171  
(303) 750-2023  
<http://www.geneticid.com>

**AnaSpec**  
2149 O'Toole Avenue, Suite F  
San Jose, CA 95131  
(800) 452-5530 FAX: (408) 452-5059  
(408) 452-5055  
<http://www.anaspec.com>

**Ancare**  
2647 Grand Avenue  
P.O. Box 814  
Bellmore, NY 11710  
(800) 645-6379 FAX: (516) 781-4937  
(516) 781-0755  
<http://www.ancare.com>

**Ancell**  
243 Third Street North  
P.O. Box 87  
Bayport, MN 55033  
(800) 374-9523 FAX: (651) 439-1940  
(651) 439-0835  
<http://www.ancell.com>

**Anderson Instruments**  
500 Technology Court  
Smyrna, GA 30082  
(800) 241-6898 FAX: (770) 319-5306  
(770) 319-9999  
<http://www.graseby.com>

**Andreas Hettich**  
Gartenstrasse 100  
Postfach 260  
D-78732 Tuttlingen, Germany  
(49) 7461 705 0  
FAX: (49) 7461 705-122  
<http://www.hettich-centrifugen.de>

**Anesthetic Vaporizer Services**  
10185 Main Street  
Clarence, NY 14031  
(719) 759-8490  
<http://www.avapor.com>

**Animal Identification and Marking Systems (AIMS)**  
13 Winchester Avenue  
Budd Lake, NJ 07828  
(908) 684-9105 FAX: (908) 684-9106  
<http://www.animalid.com>

**Annovis**  
34 Mount Pleasant Drive  
Aston, PA 19014  
(800) EASY-DNA  
FAX: (610) 361-8255  
(610) 361-9224  
<http://www.annovis.com>

**Apotex**  
150 Signet Drive  
Weston, Ontario M9L 1T9, Canada  
(416) 749-9300 FAX: (416) 749-2646  
<http://www.apotex.com>

**Apple Scientific**  
11711 Chillicothe Road, Unit 2  
P.O. Box 778  
Chesterland, OH 44026  
(440) 729-3056 FAX: (440) 729-0928  
<http://www.applesci.com>

**Applied Biosystems**  
See PE Biosystems

**Applied Imaging**  
2380 Walsh Avenue, Bldg. B  
Santa Clara, CA 95051  
(800) 634-3622 FAX: (408) 562-0264  
(408) 562-0250  
<http://www.aicorp.com>

**Applied Photophysics**  
203-205 Kingston Road  
Leatherhead, Surrey, KT22 7PB  
UK  
(44) 1372-386537

**Applied Precision**  
1040 12th Avenue Northwest  
Issaquah, Washington 98027  
(425) 557-1000  
FAX: (425) 557-1055  
<http://www.api.com/index.html>

**Appligene Oncor**  
Parc d'Innovation  
Rue Geiler de Kaysersberg, BP 72  
67402 Illkirch Cedex, France  
(33) 88 67 22 67  
FAX: (33) 88 67 19 45  
<http://www.oncor.com/prod-app.htm>

**Applikon**  
1165 Chess Drive, Suite G  
Foster City, CA 94404  
(650) 578-1396 FAX: (650) 578-8836  
<http://www.applikon.com>

**Appropriate Technical Resources**  
9157 Whiskey Bottom Road  
Laurel, MD 20723  
(800) 827-5931 FAX: (410) 792-2837  
<http://www.atrbiotech.com>

**APV Gaulin**  
100 S. CP Avenue  
Lake Mills, WI 53551  
(888) 278-4321 FAX: (888) 278-5329  
<http://www.apv.com>

**Aqualon**  
See Hercules Aqualon

**Aquarium Systems**  
8141 Tyler Boulevard  
Mentor, OH 44060  
(800) 822-1100 FAX: (440) 255-8994  
(440) 255-1997  
<http://www.aquariumsystems.com>

**Aquebogue Machine and Repair Shop**  
Box 2055  
Main Road  
Aquebogue, NY 11931  
(631) 722-3635 FAX: (631) 722-3106

**Archer Daniels Midland**  
4666 Faries Parkway  
Decatur, IL 62525  
(217) 424-5200  
<http://www.admworld.com>

**Archimica Florida**  
P.O. Box 1466  
Gainesville, FL 32602  
(800) 331-6313 FAX: (352) 371-6246  
(352) 376-8246  
<http://www.archimica.com>

**Arcor Electronics**  
1845 Oak Street #15  
Northfield, IL 60093  
(847) 501-4848

**Arcturus Engineering**  
400 Logue Avenue  
Mountain View, CA 94043  
(888) 446 7911 FAX: (650) 962 3039  
(650) 962 3020  
<http://www.arctur.com>

**Argonaut Technologies**  
887 Industrial Road, Suite G  
San Carlos, CA 94070  
(650) 998-1350 FAX: (650) 598-1359  
<http://www.argotech.com>

**Ariad Pharmaceuticals**  
26 Landsdowne Street  
Cambridge, MA 02139  
(617) 494-0400 FAX: (617) 494-8144  
<http://www.ariad.com>

**Armour Pharmaceuticals**  
See Rhone-Poulenc Rorer

**Aronex Pharmaceuticals**  
8707 Technology Forest Place  
The Woodlands, TX 77381  
(281) 367-1666 FAX: (281) 367-1676  
<http://www.aronex.com>

**Artisan Industries**  
73 Pond Street  
Waltham, MA 02254  
(617) 893-6800  
<http://www.artisanind.com>

**ASCO (Apothecaries Sundries Manufacturing Company)**  
P.O. Box No. 1  
New Delhi, 110 001, India  
<http://www.ascoindia.com/>

**ASI Instruments**  
12900 Ten Mile Road  
Warren, MI 48089  
(800) 531-1105 FAX: (810) 756-9737  
(810) 756-1222  
<http://www.asi-instruments.com>

**Aspen Research Laboratories**  
1700 Buerkle Road  
White Bear Lake, MN 55140  
(651) 264-6000 FAX: (651) 264-6270  
<http://www.aspenresearch.com>

**Associates of Cape Cod**

704 Main Street  
Falmouth, MA 02540  
(800) LAL-TEST  
FAX: (508) 540-8680  
(508) 540-3444  
<http://www.acciusa.com>

**Astra Pharmaceuticals**

See AstraZeneca

**AstraZeneca**

1800 Concord Pike  
Wilmington, DE 19850  
(302) 886-3000 FAX: (302) 886-2972  
<http://www.astrazeneca.com>

**AT Biochem**

30 Spring Mill Drive  
Malvern, PA 19355  
(610) 889-9300 FAX: (610) 889-9304

**ATC Diagnostics**

See Vysis

**ATCC**

See American Type Culture Collection

**Athens Research and Technology**

P.O. Box 5494  
Athens, GA 30604  
(706) 546-0207 FAX: (706) 546-7395

**Atlanta Biologicals**

1425-400 Oakbrook Drive  
Norcross, GA 30093  
(800) 780-7788 or (770) 446-1404  
FAX: (800) 780-7374 or  
(770) 446-1404  
<http://www.atlantabio.com>

**Atomergic Chemical**

71 Carolyn Boulevard  
Farmingdale, NY 11735  
(631) 694-9000 FAX: (631) 694-9177  
<http://www.atomergic.com>

**Atomic Energy of Canada**

2251 Speakman Drive  
Mississauga, Ontario  
L5K 1B2 Canada  
(905) 823-9040 FAX: (905) 823-1290  
<http://www.aecl.ca>

**ATR**

P.O. Box 460  
Laurel, MD 20725  
(800) 827-5931 FAX: (410) 792-2837  
(301) 470-2799  
<http://www.atrbiotech.com>

**Aurora Biosciences**

11010 Torreyana Road  
San Diego, CA 92121  
(858) 404-6600 FAX: (858) 404-6714  
<http://www.aurorabio.com>

**Automatic Switch Company**

A Division of Emerson Electric  
50 Hanover Road  
Florham Park, NJ 07932  
(800) 937-2726 FAX: (973) 966-2628  
(973) 966-2000  
<http://www.asco.com>

**Avanti Polar Lipids**

700 Industrial Park Drive  
Alabaster, AL 35007  
(800) 227-0651 FAX: (800) 229-1004  
(205) 663-2494 FAX: (205) 663-0756  
<http://www.avantilipids.com>

**Aventis**

BP 67917  
67917 Strasbourg Cedex 9, France  
33 (0) 388 99 11 00  
FAX: 33 (0) 388 99 11 01  
<http://www.aventis.com>

**Aventis Pasteur**

1 Discovery Drive  
Swiftwater, PA 18370  
(800) 822-2463 FAX: (570) 839-0955  
(570) 839-7187  
<http://www.aventispasteur.com/usa>

**Avery Dennison**

150 North Orange Grove Boulevard  
Pasadena, CA 91103  
(800) 462-8379 FAX: (626) 792-7312  
(626) 304-2000  
<http://www.averydennison.com>

**Avestin**

2450 Don Reid Drive  
Ottawa, Ontario K1H 1E1, Canada  
(888) AVESTIN FAX: (613) 736-8086  
(613) 736-0019  
<http://www.avestin.com>

**AVIV Instruments**

750 Vassar Avenue  
Lakewood, NJ 08701  
(732) 367-1663 FAX: (732) 370-0032  
<http://www.avivinst.com>

**Axon Instruments**

1101 Chess Drive  
Foster City, CA 94404  
(650) 571-9400 FAX: (650) 571-9500  
<http://www.axon.com>

**Azon**

720 Azon Road  
Johnson City, NY 13790  
(800) 847-9374 FAX: (800) 635-6042  
(607) 797-2368  
<http://www.azon.com>

**BABCO**

1223 South 47th Street  
Richmond, CA 94804  
(800) 92-BABCO  
FAX: (510) 412-8940  
(510) 412-8930  
<http://www.babco.com>

**Bacharach**

625 Alpha Drive  
Pittsburgh, PA 15238  
(800) 736-4666 FAX: (412) 963-2091  
(412) 963-2000  
<http://www.bacharach-inc.com>

**Bachem Bioscience**

3700 Horizon Drive  
King of Prussia, PA 19406  
(800) 634-3183 FAX: (610) 239-0800  
(610) 239-0300  
<http://www.bachem.com>

**Bachem California**

3132 Kashiwa Street  
P.O. Box 3426  
Torrance, CA 90510  
(800) 422-2436 FAX: (310) 530-1571  
(310) 539-4171  
<http://www.bachem.com>

**Baekon**

18866 Allendale Avenue  
Saratoga, CA 95070  
(408) 972-8779 FAX: (408) 741-0944

**Baker Chemical**

See J.T. Baker

**Ballistol**

c/o Washington Trading Company, Inc.  
1 Cypress Knee Trail  
Kitty Hawk, NC 27949  
(800) 253-2460 FAX: (252) 261-0408  
<http://www.ballistol.com>

**Bangs Laboratories**

9025 Technology Drive  
Fishers, IN 46038  
(317) 570-7020 FAX: (317) 570-7034  
<http://www.bangslabs.com>

**Bard Parker**

See Becton Dickinson

**Barnstead International**

2555 Kerper Blvd  
Dubuque, IA 52001-1478  
(800) 553-0039 FAX: (563) 581-0516  
(563) 556-2241  
<http://www.barnsteadthermolyne.com>

**Barrskogen**

4612 Laverock Place N  
Washington, DC 20007  
(800) 237-9192 FAX: (301) 464-7347

**BAS**

See Bioanalytical Systems

**BASF**

Specialty Products  
3000 Continental Drive North  
Mt. Olive, NJ 07828  
(800) 669-2273 FAX: (973) 426-2610  
<http://www.basf.com>

**Baum, W.A.**

620 Oak Street  
Copiague, NY 11726  
(631) 226-3940 FAX: (631) 226-3969  
<http://www.wabaum.com>

**Bausch & Lomb**

One Bausch & Lomb Place  
Rochester, NY 14604  
(800) 344-8815 FAX: (716) 338-6007  
(716) 338-6000  
<http://www.bausch.com>

**Baxter**

Fenwal Division  
1627 Lake Cook Road  
Deerfield, IL 60015  
(800) 766-1077 FAX: (800) 395-3291  
(847) 940-6599 FAX: (847) 940-5766  
<http://www.powerfulmedicine.com>

**Baxter Healthcare**

One Baxter Parkway  
Deerfield, IL 60015  
(800) 777-2298 FAX: (847) 948-3948  
(847) 948-2000  
<http://www.baxter.com>

**Baxter Scientific Products**

See VWR Scientific

**Bayer**

Agricultural Division  
Animal Health Products  
12707 Shawnee Mission Pkwy.  
Shawnee Mission, KS 66201  
(800) 255-6517 FAX: (913) 268-2803  
(913) 268-2000  
<http://www.bayerus.com>

**Bayer**

Diagnostics Division (Order Services)  
P.O. Box 2009  
Mishawaka, IN 46546  
(800) 248-2637 FAX: (800) 863-6882  
(219) 256-3390  
<http://www.bayer.com>

**Bayer Diagnostics**

511 Benedict Avenue  
Tarrytown, NY 10591  
(800) 255-3232 FAX: (914) 524-2132  
(914) 631-8000  
<http://www.bayerdiag.com>

**Bayer Plc**

Diagnostics Division  
Bayer House, Strawberry Hill  
Newbury, Berkshire RG14 1JA, UK  
(44) 1635-563000  
FAX: (44) 1635-563393  
<http://www.bayer.co.uk>

**BD Immunocytometry Systems**

2350 Qume Drive  
San Jose, CA 95131  
(800) 223-8226 FAX: (408) 954-BDIS  
<http://www.bdfacs.com>

**BD Labware**

Two Oak Park  
Bedford, MA 01730  
(800) 343-2035 FAX: (800) 743-6200  
<http://www.bd.com/labware>

**Suppliers**

**BD PharMingen**

10975 Torreyana Road  
San Diego, CA 92121  
(800) 848-6227 FAX: (858) 812-8888  
(858) 812-8800  
<http://www.pharMingen.com>

**BD Transduction Laboratories**

133 Venture Court  
Lexington, KY 40511  
(800) 227-4063 FAX: (606) 259-1413  
(606) 259-1550  
<http://www.translab.com>

**BDH Chemicals**

Broom Road  
Poole, Dorset BH12 4NN, UK  
(44) 1202-745520  
FAX: (44) 1202-2413720

**BDH Chemicals**

See Hoefer Scientific Instruments

**BDIS**

See BD Immunocytometry Systems

**Beckman Coulter**

4300 North Harbor Boulevard  
Fullerton, CA 92834  
(800) 233-4685 FAX: (800) 643-4366  
(714) 871-4848  
<http://www.beckman-coulter.com>

**Beckman Instruments**

Spinco Division/Bioproductions Operation  
1050 Page Mill Road  
Palo Alto, CA 94304  
(800) 742-2345 FAX: (415) 859-1550  
(415) 857-1150  
<http://www.beckman-coulter.com>

**Becton Dickinson Immunocytometry & Cellular Imaging**

2350 Qume Drive  
San Jose, CA 95131  
(800) 223-8226 FAX: (408) 954-2007  
(408) 432-9475  
<http://www.bdfacs.com>

**Becton Dickinson Labware**

1 Becton Drive  
Franklin Lakes, NJ 07417  
(888) 237-2762 FAX: (800) 847-2220  
(201) 847-4222  
<http://www.bdfacs.com>

**Becton Dickinson Labware**

2 Bridgewater Lane  
Lincoln Park, NJ 07035  
(800) 235-5953 FAX: (800) 847-2220  
(201) 847-4222  
<http://www.bdfacs.com>

**Becton Dickinson Primary**

Care Diagnostics  
7 Loveton Circle  
Sparks, MD 21152  
(800) 675-0908 FAX: (410) 316-4723  
(410) 316-4000  
<http://www.bdfacs.com>

**Behringwerke Diagnostika**

Hoechst Strasse 70  
P-65835 Liederbach, Germany  
(49) 69-30511 FAX: (49) 69-303-834

**Bellco Glass**

340 Edrudo Road  
Vineland, NJ 08360  
(800) 257-7043 FAX: (856) 691-3247  
(856) 691-1075  
<http://www.bellcoglass.com>

**Bender Biosystems**

See Serva

**Beral Enterprises**

See Garren Scientific

**Berkeley Antibody**

See BAbCO

**Bernsco Surgical Supply**

25 Plant Avenue  
Hauppauge, NY 11788  
(800) TIEMANN FAX: (516) 273-6199  
(516) 273-0005  
<http://www.bernsc.com>

**Beta Medical and Scientific (Datesand Ltd.)**

2 Ferndale Road  
Sale, Manchester M33 3GP, UK  
(44) 1612 317676  
FAX: (44) 1612 313656

**Bethesda Research Laboratories (BRL)**

See Life Technologies

**Biacore**

200 Centennial Avenue, Suite 100  
Piscataway, NJ 08854  
(800) 242-2599 FAX: (732) 885-5669  
(732) 885-5618  
<http://www.biacore.com>

**Bilaney Consultants**

St. Julian's  
Sevenoaks, Kent TN15 0RX, UK  
(44) 1732 450002  
FAX: (44) 1732 450003  
<http://www.bilaney.com>

**Binding Site**

5889 Oberlin Drive, Suite 101  
San Diego, CA 92121  
(800) 633-4484 FAX: (619) 453-9189  
(619) 453-9177  
<http://www.bindingsite.co.uk>

**BIO 101**

See Qbiogene

**Bio Image**

See Genomic Solutions

**Bioanalytical Systems**

2701 Kent Avenue  
West Lafayette, IN 47906  
(800) 845-4246 FAX: (765) 497-1102  
(765) 463-4527  
<http://www.bioanalytical.com>

**Bio/Can Scientific, Inc.**

2170 Dunwin Drive  
Unit 5  
Mississauga, Ontario  
L5L 1C7 Canada  
(800) 387-8125 FAX: (905) 828-9422  
(905) 838-2455  
<http://www.biocan.com>

**Biocell**

2001 University Drive  
Rancho Dominguez, CA 90220  
(800) 222-8382 FAX: (310) 637-3927  
(310) 537-3300  
<http://www.biocell.com>

**Biochrom AG**

Postfach 46 03 09  
D-12213 Berlin  
Germany  
49-30-7799-60 FAX: 49-30-7710-012  
<http://www.biochrom.de>

**Biocoat**

See BD Labware

**BioComp Instruments**

650 Churchill Road  
Fredericton, New Brunswick  
E3B 1P6 Canada  
(800) 561-4221 FAX: (506) 453-3583  
(506) 453-4812  
<http://131.202.97.21>

**BioDesign**

P.O. Box 1050  
Carmel, NY 10512  
(914) 454-6610 FAX: (914) 454-6077  
<http://www.biodesignofny.com>

**BioDiscovery**

4640 Admiralty Way, Suite 710  
Marina Del Rey, CA 90292  
(310) 306-9310 FAX: (310) 306-9109  
<http://www.biodiscovery.com>

**Bioengineering AG**

Sagenrainstrasse 7  
CH8636 Wald, Switzerland  
(41) 55-256-8-111  
FAX: (41) 55-256-8-256

**Biofluids**

Division of Biosource International  
1114 Taft Street  
Rockville, MD 20850  
(800) 972-5200 FAX: (301) 424-3619  
(301) 424-4140  
<http://www.biosource.com>

**BioFX Laboratories**

9633 Liberty Road, Suite S  
Randallstown, MD 21133  
(800) 445-6447 FAX: (410) 498-6008  
(410) 496-6006  
<http://www.biofx.com>

**BioGenex Laboratories**

4600 Norris Canyon Road  
San Ramon, CA 94583  
(800) 421-4149 FAX: (925) 275-0580  
(925) 275-0550  
<http://www.biogenex.com>

**Bioline**

2470 Wrondel Way  
Reno, NV 89502  
(888) 257-5155 FAX: (775) 828-7676  
(775) 828-0202  
<http://www.bioline.com>

**Bio-Logic Research & Development**

1, rue de l'Europe  
A.Z. de Font-Ratel  
38640 CLAIIX, France  
(33) 76-98-68-31  
FAX: (33) 76-98-69-09

**Biological Detection Systems**

See Celloomics or Amersham

**Biomeda**

1166 Triton Drive, Suite E  
P.O. Box 8045  
Foster City, CA 94404  
(800) 341-8787 FAX: (650) 341-2299  
(650) 341-8787  
<http://www.biomeda.com>

**BioMedic Data Systems**

1 Silas Road  
Seaford, DE 19973  
(800) 526-2637 FAX: (302) 628-4110  
(302) 628-4100  
<http://www.bmds.com>

**Biomedical Engineering**

P.O. Box 980694  
Virginia Commonwealth University  
Richmond, VA 23298  
(804) 828-9829 FAX: (804) 828-1008

**Biomedical Research Instruments**

12264 Wilkins Avenue  
Rockville, MD 20852  
(800) 327-9498  
(301) 881-7911  
<http://www.biomedinstr.com>

**Bio/medical Specialties**

P.O. Box 1887  
Santa Monica, CA 90406  
(800) 269-1158 FAX: (800) 269-1158  
(323) 938-7515

**BioMerieux**

100 Rodolphe Street  
Durham, North Carolina 27712  
(919) 620-2000  
<http://www.biomerieux.com>

**BioMetallics**

P.O. Box 2251  
Princeton, NJ 08543  
(800) 999-1961 FAX: (609) 275-9485  
(609) 275-0133  
<http://www.microplate.com>

**Biomol Research Laboratories**

5100 Campus Drive  
Plymouth Meeting, PA 19462  
(800) 942-0430 FAX: (610) 941-9252  
(610) 941-0430  
<http://www.biomol.com>

**Bionique Testing Labs**

Fay Brook Drive  
RR 1, Box 196  
Saranac Lake, NY 12983  
(518) 891-2356 FAX: (518) 891-5753  
<http://www.bionique.com>

**Biopac Systems**

42 Aero Camino  
Santa Barbara, CA 93117  
(805) 685-0066 FAX: (805) 685-0067  
<http://www.biopac.com>

**BioPredict, Inc.**

Suite 201  
660 Kinderkamack Rd.  
Oradell, NJ 07649-1525  
(201) 967-0200 FAX: (201) 786-9113  
<http://www.biopredict.com>

**Bioproducts for Science**

See Harlan Bioproducts for Science

**Bioprotechs**

3560 Beck Road Butler, PA 16002  
(877) 548-3235 FAX: (724) 282-0745  
(724) 282-7145  
<http://www.bioprotechs.com>

**BIOQUANT-R&M Biometrics**

5611 Ohio Ave  
Nashville, TN 37209  
(800) 221-0549 (615) 350-7866  
FAX: (615) 350-7282  
<http://www.bioquant.com>

**Bio-Rad Laboratories**

2000 Alfred Nobel Drive  
Hercules, CA 94547  
(800) 424-6723 FAX: (800) 879-2289  
(510) 741-1000 FAX: (510) 741-5800  
<http://www.bio-rad.com>

**Bio-Rad Laboratories**

Maylands Avenue  
Hemel Hempstead, Herts HP2 7TD,  
UK  
<http://www.bio-rad.com>

**BioRobotics**

3-4 Bennell Court  
Comberton, Cambridge CB3 7DS, UK  
(44) 1223-264345  
FAX: (44) 1223-263933  
<http://www.biorobotics.co.uk>

**BIOS Laboratories**

See Genaisance Pharmaceuticals

**Biosearch Technologies**

81 Digital Drive  
Novato, CA 94949  
(800) GENOME1  
FAX: (415) 883-8488  
(415) 883-8400  
<http://www.biosearchtech.com>

**BioSeptra**

111 Locke Drive  
Marlborough, MA 01752  
(800) 752-5277 FAX: (508) 357-7595  
(508) 357-7500  
<http://www.bioseptra.com>

**Bio-Serv**

1 8th Street, Suite 1  
Frenchtown, NJ 08825  
(908) 996-2155 FAX: (908) 996-4123  
<http://www.bio-serv.com>

**BioSignal**

1744 William Street, Suite 600  
Montreal, Quebec H3J 1R4, Canada  
(800) 293-4501 FAX: (514) 937-0777  
(514) 937-1010  
<http://www.biosignal.com>

**BioSoft**

P.O. Box 10938  
Ferguson, MO 63135  
(314) 524-8029 FAX: (314) 524-8129  
<http://www.biosoft.com>

**Biosource International**

820 Flynn Road  
Camarillo, CA 93012  
(800) 242-0607 FAX: (805) 987-3385  
(805) 987-0086  
<http://www.biosource.com>

**BioSpec Products**

P.O. Box 788  
Bartlesville, OK 74005  
(800) 617-3363 FAX: (918) 336-3363  
(918) 336-3363  
<http://www.biospec.com>

**Biosure**

See Riese Enterprises

**Biosym Technologies**

See Molecular Simulations

**Biosys**

21 quai du Clos des Roses  
60200 Compiègne, France  
(33) 03 4486 2275  
FAX: (33) 03 4484 2297

**Bio-Tech Research Laboratories**

NIAID Repository  
Rockville, MD 20850  
<http://www.niaid.nih.gov/ncn/repos.htm>

**Biotech Instruments**

Biotech House  
75A High Street  
Kimpton, Hertfordshire SG4 8PU, UK  
(44) 1438 832555  
FAX: (44) 1438 833040  
<http://www.biotinst.demon.co.uk>

**Biotech International**

11 Durbell Street  
Acacia Ridge, Queensland 4110  
Australia  
61-7-3370-6396  
FAX: 61-7-3370-6370  
<http://www.avianbiotech.com>

**Biotech Source**

Inland Farm Drive  
South Windham, ME 04062  
(207) 892-3266 FAX: (207) 892-6774

**Bio-Tek Instruments**

Highland Industrial Park  
P.O. Box 998  
Winooski, VT 05404  
(800) 451-5172 FAX: (802) 655-7941  
(802) 655-4040  
<http://www.biotek.com>

**Biotech Laboratories**

6023 South Loop East  
Houston, TX 77033  
(800) 535-6286 FAX: (713) 643-3143  
(713) 643-0606  
<http://www.biotech.com>

**BioTherm**

3260 Wilson Boulevard  
Arlington, VA 22201  
(703) 522-1705 FAX: (703) 522-2606

**Bioventures**

P.O. Box 2561  
848 Scott Street  
Murfreesboro, TN 37133  
(800) 235-8938 FAX: (615) 896-4837  
<http://www.bioventures.com>

**BioWhittaker**

8830 Biggs Ford Road  
P.O. Box 127  
Walkersville, MD 21793  
(800) 638-8174 FAX: (301) 845-8338  
(301) 898-7025  
<http://www.biowhittaker.com>

**Biozyme Laboratories**

9939 Hibert Street, Suite 101  
San Diego, CA 92131  
(800) 423-8199 FAX: (858) 549-0138  
(858) 549-4484  
<http://www.biozyme.com>

**Bird Products**

1100 Bird Center Drive  
Palm Springs, CA 92262  
(800) 328-4139 FAX: (760) 778-7274  
(760) 778-7200  
<http://www.birdprod.com/bird>

**B & K Universal**

2403 Yale Way  
Fremont, CA 94538  
(800) USA-MICE  
FAX: (510) 490-3036

**BLS Ltd.**

Zselyi Aladar u. 31  
1165 Budapest, Hungary  
(36) 1-407-2602  
FAX: (36) 1-407-2896  
<http://www.bls-ltd.com>

**Blue Sky Research**

3047 Orchard Parkway  
San Jose, CA 95134  
(408) 474-0988 FAX: (408) 474-0989  
<http://www.blueskyresearch.com>

**Blumenthal Industries**

7 West 36th Street, 13th floor  
New York, NY 10018  
(212) 719-1251 FAX: (212) 594-8828

**BOC Edwards**

One Edwards Park  
301 Ballardvale Street  
Wilmington, MA 01887  
(800) 848-9800 FAX: (978) 658-7969  
(978) 658-5410  
<http://www.bocedwards.com>

**Boehringer Ingelheim**

900 Ridgebury Road  
P.O. Box 368  
Ridgefield, CT 06877  
(800) 243-0127 FAX: (203) 798-6234  
(203) 798-9988  
<http://www.boehringer-ingelheim.com>

**Boehringer Mannheim**

Biochemicals Division  
See Roche Diagnostics

**Boekel Scientific**

855 Pennsylvania Boulevard  
Feasterville, PA 19053  
(800) 336-6929 FAX: (215) 396-8264  
(215) 396-8200  
<http://www.boekelsci.com>

**Bohdan Automation**

1500 McCormack Boulevard  
Mundelein, IL 60060  
(708) 680-3939 FAX: (708) 680-1199

**BPAmoco**

4500 McGinnis Ferry Road  
Alpharetta, GA 30005  
(800) 328-4537 FAX: (770) 772-8213  
(770) 772-8200  
<http://www.bpamoco.com>

**Brain Research Laboratories**

Waban P.O. Box 88  
Newton, MA 02468  
(888) BRL-5544 FAX: (617) 965-6220  
(617) 965-5544  
<http://www.brainresearchlab.com>

**Braintree Scientific**

P.O. Box 850929  
Braintree, MA 02185  
(781) 843-1644 FAX: (781) 982-3160  
<http://www.braintreesci.com>

**Suppliers**

**Brandel**

8561 Atlas Drive  
Gaithersburg, MD 20877  
(800) 948-6506 FAX: (301) 869-5570  
(301) 948-6506  
<http://www.brandel.com>

**Branson Ultrasonics**

41 Eagle Road  
Danbury, CT 06813  
(203) 796-0400 FAX: (203) 796-9838  
<http://www.plasticsnet.com/branson>

**B. Braun Biotech**

999 Postal Road  
Allentown, PA 18103  
(800) 258-9000 FAX: (610) 266-9319  
(610) 266-6262  
<http://www.bbbrainbiotech.com>

**B. Braun Biotech International**

Schwarzenberg Weg 73-79  
P.O. Box 1120  
D-34209 Melsungen, Germany  
(49) 5661-71-3400  
FAX: (49) 5661-71-3702  
<http://www.bbbrainbiotech.com>

**B. Braun-McGaw**

2525 McGaw Avenue  
Irvine, CA 92614  
(800) BBRAUN-2 (800) 624-2963  
<http://www.bbbrainusa.com>

**B. Braun Medical**

Thorncliffe Park  
Sheffield S35 2PW, UK  
(44) 114-225-9000  
FAX: (44) 114-225-9111  
<http://www.bbmuk.demon.co.uk>

**Brenntag**

P.O. Box 13788  
Reading, PA 19612-3788  
(610) 926-4151 FAX: (610) 926-4160  
<http://www.brenntagnortheast.com>

**Bresatec**

See GeneWorks

**Bright/Hacker Instruments**

17 Sherwood Lane  
Fairfield, NJ 07004  
(973) 226-8450 FAX: (973) 808-8281  
<http://www.hackerinstruments.com>

**Brinkmann Instruments**

Subsidiary of Sybron  
1 Cantiague Road  
P.O. Box 1019  
Westbury, NY 11590  
(800) 645-3050 FAX: (516) 334-7521  
(516) 334-7500  
<http://www.brinkmann.com>

**Bristol-Meyers Squibb**

P.O. Box 4500  
Princeton, NJ 08543  
(800) 631-5244 FAX: (800) 523-2965  
<http://www.bms.com>

**Broadley James**

19 Thomas  
Irvine, CA 92618  
(800) 288-2833 FAX: (949) 829-5560  
(949) 829-5555  
<http://www.broadleyjames.com>

**Brookhaven Instruments**

750 Blue Point Road  
Holtsville, NY 11742  
(631) 758-3200 FAX: (631) 758-3255  
<http://www.bic.com>

**Brownlee Labs**

See Applied Biosystems  
Distributed by Pacer Scientific

**Bruel & Kjaer**

Division of Spectris Technologies  
2815 Colonnades Court  
Norcross, GA 30071  
(800) 332-2040 FAX: (770) 847-8440  
(770) 209-6907  
<http://www.bkhome.com>

**Bruker Analytical X-Ray Systems**

5465 East Cheryl Parkway  
Madison, WI 53711  
(800) 234-XRAY  
FAX: (608) 276-3006  
(608) 276-3000  
<http://www.bruker-axs.com>

**Bruker Instruments**

19 Fortune Drive  
Billerica, MA 01821  
(978) 667-9580 FAX: (978) 667-0985  
<http://www.bruker.com>

**BS Pyromatic India**

27/1, XII Avenue  
Ashok Nagar, Chennai, 600083, India  
<http://www.bsipyromatic.com/>

**BTX**

Division of Genetronics  
11199 Sorrento Valley Road  
San Diego, CA 92121  
(800) 289-2465 FAX: (858) 597-9594  
(858) 597-6006  
<http://www.genetronics.com/btx>

**Buchler Instruments**

See Baxter Scientific Products

**Buckshire**

2025 Ridge Road  
Perkasie, PA 18944  
(215) 257-0116

**Burdick and Jackson**

Division of Baxter Scientific Products  
1953 S. Harvey Street  
Muskegon, MI 49442  
(800) 368-0050 FAX: (231) 728-8226  
(231) 726-3171  
<http://www.bandj.com/mainframe.htm>

**Burleigh Instruments**

P.O. Box E  
Fishers, NY 14453  
(716) 924-9355 FAX: (716) 924-9072  
<http://www.burleigh.com>

**Burns Veterinary Supply**

1900 Diplomat Drive  
Farmer's Branch, TX 75234  
(800) 92-BURNS  
FAX: (972) 243-6841  
<http://www.burnsvet.com>

**Burroughs Wellcome**

See Glaxo Wellcome

**The Butler Company**

5600 Blazer Parkway  
Dublin, OH 43017  
(800) 551-3861 FAX: (614) 761-9096  
(614) 761-9095  
<http://www.wabutler.com>

**Butterworth Laboratories**

54-56 Waldegrave Road  
Teddington, Middlesex  
TW11 8LG, UK  
(44)(0)20-8977-0750  
FAX: (44)(0)28-8943-2624  
<http://www.butterworth-labs.co.uk>

**Buxco Electronics**

95 West Wood Road #2  
Sharon, CT 06069  
(860) 364-5558 FAX: (860) 364-5116  
<http://www.buxco.com>

**C/D/N Isotopes**

88 Leacock Street Pointe-Claire,  
Quebec  
H9R 1H1 Canada  
(800) 697-6254 FAX: (514) 697-6148

**C.M.A./Microdialysis AB**

73 Princeton Street  
North Chelmsford, MA 01863  
(800) 440-4980 FAX: (978) 251-1950  
(978) 251-1940  
<http://www.microdialysis.com>

**Calbiochem-Novabiochem**

P.O. Box 12087-2087  
La Jolla, CA 92039  
(800) 854-3417 FAX: (800) 776-0999  
(858) 450-9600  
<http://www.calbiochem.com>

**California Fine Wire**

338 South Fourth Street  
Grover Beach, CA 93433  
(805) 489-5144 FAX: (805) 489-5352  
<http://www.calfinewire.com>

**Calorimetry Sciences**

155 West 2050 North  
Spanish Fork, UT 84660  
(801) 794-2600 FAX: (801) 794-2700  
<http://www.calscorp.com>

**Caltag Laboratories**

1849 Bayshore Highway, Suite 200  
Burlingame, CA 94010  
(800) 874-4007 FAX: (650) 652-9030  
(650) 652-0468  
<http://www.caltag.com>

**Cambrex Research Products**

(800) 638-8174  
<http://www.cambrex.com/bioproducts>

**Cambridge Electronic Design**

Science Park, Milton Road  
Cambridge CB4 0FE, UK  
44 (0) 1223-420-186  
FAX: 44 (0) 1223-420-488  
<http://www.ced.co.uk>

**Cambridge Isotope Laboratories**

50 Frontage Road  
Andover, MA 01810  
(800) 322-1174 FAX: (978) 749-2768  
(978) 749-8000  
<http://www.isotope.com>

**Cambridge Research Biochemicals**

See Zeneca/CRB

**Cambridge Technology**

109 Smith Place  
Cambridge, MA 02138  
(617) 441-0600 FAX: (617) 497-8800  
<http://www.camtech.com>

**Camlab**

Nuffield Road  
Cambridge CB4 1TH, UK  
(44) 122-3424222  
FAX: (44) 122-3420856  
<http://www.camlab.co.uk/home.htm>

**Campden Instruments**

Park Road  
Sibley Loughborough  
Leicestershire LE12 7TU, UK  
(44) 1509-814790  
FAX: (44) 1509-816097  
<http://www.campden-inst.com/home.htm>

**Cappel Laboratories**

See Organon Teknika Cappel

**Carl Roth GmbH & Company**

Schoemperlenstrasse 1-5  
76185 Karlsrube  
Germany  
(49) 72-156-06164  
FAX: (49) 72-156-06264  
<http://www.carl-roth.de>

**Carl Zeiss**

One Zeiss Drive  
Thornwood, NY 10594  
(800) 233-2343 FAX: (914) 681-7446  
(914) 747-1800  
<http://www.zeiss.com>

**Suppliers**

**Carlo Erba Reagenti**

Via Winckelmann 1  
20148 Milano  
Lombardia, Italy  
(39) 0-29-5231  
FAX: (39) 0-29-5235-904  
<http://www.carloerbareagenti.com>

**Carolina Biological Supply**

2700 York Road  
Burlington, NC 27215  
(800) 334-5551  
FAX: (336) 584-76869  
(336) 584-0381  
<http://www.carolina.com>

**Carolina Fluid Components**

9309 Stockport Place  
Charlotte, NC 28273  
(704) 588-6101 FAX: (704) 588-6115  
<http://www.cfcsite.com>

**Cartesian Technologies**

17851 Skypark Circle, Suite C  
Irvine, CA 92614  
(800) 935-8007  
<http://cartesiantech.com>

**Cayman Chemical**

1180 East Ellsworth Road  
Ann Arbor, MI 48108  
(800) 364-9897 FAX: (734) 971-3640  
(734) 971-3335  
<http://www.caymanchem.com>

**CB Sciences**

One Washington Street, Suite 404  
Dover, NH 03820  
(800) 234-1757 FAX: (603) 742-2455  
<http://www.cbsci.com>

**CBS Scientific**

P.O. Box 856  
Del Mar, CA 92014  
(800) 243-4959 FAX: (858) 755-0733  
(858) 755-4959  
<http://www.cbssci.com>

**CCR (Coriell Cell Repository)**

See Coriell Institute for Medical Research

**CE Instruments**

Grand Avenue Parkway  
Austin, TX 78728  
(800) 876-6711 FAX: (512) 251-1597  
<http://www.ceinstruments.com>

**Cedarlane Laboratories**

5516 8th Line, R.R. #2  
Hornby, Ontario L0P 1E0, Canada  
(905) 878-8891 FAX: (905) 878-7800  
<http://www.cedarlanelabs.com>

**CEL Associates**

P.O. Box 721854  
Houston, TX 77272  
(800) 537-9339 FAX: (281) 933-0922  
(281) 933-9339  
<http://www.cel-1.com>

**Cel-Line Associates**

See Erie Scientific

**Celite World Minerals**

130 Castilian Drive  
Santa Barbara, CA 93117  
(805) 562-0200 FAX: (805) 562-0299  
<http://www.worldminerals.com/celite>

**Cell Genesys**

342 Lakeside Drive  
Foster City, CA 94404  
(650) 425-4400 FAX: (650) 425-4457  
<http://www.cellgenesys.com>

**Cell Systems**

12815 NE 124th Street, Suite A  
Kirkland, WA 98034  
(800) 697-1211 FAX: (425) 820-6762  
(425) 823-1010

**Cellmark Diagnostics**

20271 Goldenrod Lane  
Germantown, MD 20876  
(800) 872-5227 FAX: (301) 428-4877  
(301) 428-4980  
<http://www.cellmark-labs.com>

**Cellomics**

635 William Pitt Way  
Pittsburgh, PA 15238  
(888) 826-3857 FAX: (412) 826-3850  
(412) 826-3600  
<http://www.cellomics.com>

**CellPoint Scientific, Inc.**

042-864-0338 FAX: 042-864-0366  
<http://www.biobank.co.kr>

**Celltech**

216 Bath Road  
Slough, Berkshire SL1 4EN, UK  
(44) 1753 534655  
FAX: (44) 1753 536632  
<http://www.celltech.co.uk>

**Cellular Products**

872 Main Street  
Buffalo, NY 14202  
(800) CPI-KITS FAX: (716) 882-0959  
(716) 882-0920  
<http://www.zeptometrix.com>

**CEM**

P.O. Box 200  
Matthews, NC 28106  
(800) 726-3331

**Centers for Disease Control**

1600 Clifton Road NE  
Atlanta, GA 30333  
(800) 311-3435 FAX: (888) 232-3228  
(404) 639-3311  
<http://www.cdc.gov>

**CERJ**

Centre d'Elevage Roger Janvier  
53940 Le Genest Saint Isle  
France

**Cetus**

See Chiron

**Chance Propper**

Warily, West Midlands B66 1NZ, UK  
(44)(0)121-553-5551  
FAX: (44)(0)121-525-0139

**Charles River Laboratories**

251 Ballardvale Street  
Wilmington, MA 01887  
(800) 522-7287 FAX: (978) 658-7132  
(978) 658-6000  
<http://www.criver.com>

**Charm Sciences**

36 Franklin Street  
Malden, MA 02148  
(800) 343-2170 FAX: (781) 322-3141  
(781) 322-1523  
<http://www.charm.com>

**Chase-Walton Elastomers**

29 Apsley Street  
Hudson, MA 01749  
(800) 448-6289 FAX: (978) 562-5178  
(978) 568-0202  
<http://www.chase-walton.com>

**ChemGenes**

Ashland Technology Center  
200 Homer Avenue  
Ashland, MA 01721  
(800) 762-9323 FAX: (508) 881-3443  
(508) 881-5200  
<http://www.chemgenes.com>

**Chemglass**

3861 North Mill Road  
Vineland, NJ 08360  
(800) 843-1794 FAX: (856) 696-9102  
(800) 696-0014  
<http://www.chemglass.com>

**Chemicon International**

28835 Single Oak Drive  
Temecula, CA 92590  
(800) 437-7500 FAX: (909) 676-9209  
(909) 676-8080  
<http://www.chemicon.com>

**Chem-Impex International**

935 Dillon Drive  
Wood Dale, IL 60191  
(800) 869-9290 FAX: (630) 766-2218  
(630) 766-2112  
<http://www.chemimpex.com>

**Chem Service**

P.O. Box 599  
West Chester, PA 19381-0599  
(610) 692-3026 FAX: (610) 692-8729  
<http://www.chemservice.com>

**ChemSyn Laboratories**

13605 West 96th Terrace  
Lenexa, KS 66215  
(913) 541-0525 FAX: (913) 888-3582  
<http://www.tech.epcorp.com/ChemSyn/chemsyn.htm>

**Chemunex USA**

1 Deer Park Drive, Suite H-2  
Monmouth Junction, NJ 08852  
(800) 411-6734  
<http://www.chemunex.com>

**Cherwell Scientific Publishing**

The Magdalen Centre  
Oxford Science Park  
Oxford OX44GA, UK  
(44)(1) 865-784-800  
FAX: (44)(1) 865-784-801  
<http://www.cherwell.com>

**ChiRex Cauldron**

383 Phoenixville Pike  
Malvern, PA 19355  
(610) 727-2215 FAX: (610) 727-5762  
<http://www.chirex.com>

**Chiron Diagnostics**

See Bayer Diagnostics

**Chiron Mimotopes Peptide Systems**

See Multiple Peptide Systems

**Chiron**

4560 Horton Street  
Emeryville, CA 94608  
(800) 244-7668 FAX: (510) 655-9910  
(510) 655-8730  
<http://www.chiron.com>

**Chrom Tech**

P.O. Box 24248  
Apple Valley, MN 55124  
(800) 822-5242 FAX: (952) 431-6345  
<http://www.chromtech.com>

**Chroma Technology**

72 Cotton Mill Hill, Unit A-9  
Brattleboro, VT 05301  
(800) 824-7662 FAX: (802) 257-9400  
(802) 257-1800  
<http://www.chroma.com>

**Chromatographie**

ZAC de Moulin No. 2  
91160 Saulx les Chartreux  
France  
(33) 01-64-54-8969  
FAX: (33) 01-69-0988091  
<http://www.chromatographie.com>

**Chromogenix**

Taljegardsgatan 3  
431-53 Mndal, Sweden  
(46) 31-706-20-70  
FAX: (46) 31-706-20-80  
<http://www.chromogenix.com>

**Chrompack USA**

c/o Varian USA  
2700 Mitchell Drive  
Walnut Creek, CA 94598  
(800) 526-3687 FAX: (925) 945-2102  
(925) 939-2400  
<http://www.chrompack.com>

**Suppliers**



**Chugai Biopharmaceuticals**

6275 Nancy Ridge Drive  
San Diego, CA 92121  
(858) 535-5900 FAX: (858) 546-5973  
<http://www.chugaibio.com>

**Ciba-Corning Diagnostics**

See Bayer Diagnostics

**Ciba-Geigy**

See Ciba Specialty Chemicals or  
Novartis Biotechnology

**Ciba Specialty Chemicals**

540 White Plains Road  
Tarrytown, NY 10591  
(800) 431-1900 FAX: (914) 785-2183  
(914) 785-2000  
<http://www.cibasc.com>

**Ciba Vision**

Division of Novartis AG  
11460 Johns Creek Parkway  
Duluth, GA 30097  
(770) 476-3937  
<http://www.cvworl.com>

**Cidex**

Advanced Sterilization Products  
33 Technology Drive  
Irvine, CA 92618  
(800) 595-0200 (949) 581-5799  
<http://www.cidex.com/ASPnew.htm>

**Cinna Scientific**

Subsidiary of Molecular Research  
Center  
5645 Montgomery Road  
Cincinnati, OH 45212  
(800) 462-9868 FAX: (513) 841-0080  
(513) 841-0900  
<http://www.mrcgene.com>

**Cistron Biotechnology**

10 Bloomfield Avenue  
Pine Brook, NJ 07058  
(800) 642-0167 FAX: (973) 575-4854  
(973) 575-1700  
<http://www.cistronbio.com>

**Clark Electromedical Instruments**

See Harvard Apparatus

**Clay Adam**

See Becton Dickinson Primary Care  
Diagnostics

**CLB (Central Laboratory  
of the Netherlands)**

Blood Transfusion Service  
P.O. Box 9190  
1006 AD Amsterdam, The Netherlands  
(31) 20-512-9222  
FAX: (31) 20-512-3332

**Cleveland Scientific**

P.O. Box 300  
Bath, OH 44210  
(800) 952-7315 FAX: (330) 666-2240  
<http://www.clevelandscientific.com>

**Clonetics**

Division of BioWhittaker  
<http://www.clonetics.com>  
Also see BioWhittaker

**Clontech Laboratories**

1020 East Meadow Circle  
Palo Alto, CA 94303  
(800) 662-2566 FAX: (800) 424-1350  
(650) 424-8222 FAX: (650) 424-1088  
<http://www.clontech.com>

**Closure Medical Corporation**

5250 Greens Dairy Road  
Raleigh, NC 27616  
(919) 876-7800 FAX: (919) 790-1041  
<http://www.closuremed.com>

**CMA Microdialysis AB**

73 Princeton Street  
North Chelmsford, MA 01863  
(800) 440-4980 FAX: (978) 251-1950  
(978) 251 1940  
<http://www.microdialysis.com>

**Cocalico Biologicals**

449 Stevens Road  
P.O. Box 265  
Reamstown, PA 17567  
(717) 336-1990 FAX: (717) 336-1993

**Coherent Laser**

5100 Patrick Henry Drive  
Santa Clara, CA 95056  
(800) 227-1955 FAX: (408) 764-4800  
(408) 764-4000  
<http://www.cohr.com>

**Cohu**

P.O. Box 85623  
San Diego, CA 92186  
(858) 277-6700 FAX: (858) 277-0221  
<http://www.COHU.com/cctv>

**Cole-Parmer Instrument**

625 East Bunker Court  
Vernon Hills, IL 60061  
(800) 323-4340 FAX: (847) 247-2929  
(847) 549-7600  
<http://www.coleparmer.com>

**Collaborative Biomedical Products  
and Collaborative Research**

See Becton Dickinson Labware

**Collagen Aesthetics**

1850 Embarcadero Road  
Palo Alto, CA 94303  
(650) 856-0200 FAX: (650) 856-0533  
<http://www.collagen.com>

**Collagen Corporation**

See Collagen Aesthetics

**College of American Pathologists**

325 Waukegan Road  
Northfield, IL 60093  
(800) 323-4040 FAX: (847) 832-8000  
(847) 446-8800  
<http://www.cap.org/index.cfm>

**Colonial Medical Supply**

504 Wells Road  
Franconia, NH 03580  
(603) 823-9911 FAX: (603) 823-8799  
<http://www.colmedsupply.com>

**Colorado Serum**

4950 York Street  
Denver, CO 80216  
(800) 525-2065 FAX: (303) 295-1923  
<http://www.colorado-serum.com>

**Columbia Diagnostics**

8001 Research Way  
Springfield, VA 22153  
(800) 336-3081 FAX: (703) 569-2353  
(703) 569-7511  
<http://www.columbiadiagnostics.com>

**Columbus Instruments**

950 North Hague Avenue  
Columbus, OH 43204  
(800) 669-5011 FAX: (614) 276-0529  
(614) 276-0861  
<http://www.columbusinstruments.com>

**Computer Associates International**

One Computer Associates Plaza  
Islandia, NY 11749  
(631) 342-6000 FAX: (631) 342-6800  
<http://www.cai.com>

**Connaught Laboratories**

See Aventis Pasteur

**Connectix**

2955 Campus Drive, Suite 100  
San Mateo, CA 94403  
(800) 950-5880 FAX: (650) 571-0850  
(650) 571-5100  
<http://www.connectix.com>

**Contech**

99 Hartford Avenue  
Providence, RI 02909  
(401) 351-4890 FAX: (401) 421-5072  
<http://www.iol.ie/~burke/contech.html>

**Continental Laboratory Products**

5648 Copley Drive  
San Diego, CA 92111  
(800) 456-7741 FAX: (858) 279-5465  
(858) 279-5000  
<http://www.conlab.com>

**ConvaTec**

Professional Services  
P.O. Box 5254  
Princeton, NJ 08543  
(800) 422-8811  
<http://www.convatec.com>

**Cooper Instruments & Systems**

P.O. Box 3048  
Warrenton, VA 20188  
(800) 344-3921 FAX: (540) 347-4755  
(540) 349-4746  
<http://www.cooperinstruments.com>

**Cora Styles Needles 'N Blocks**

56 Milton Street  
Arlington, MA 02474  
(781) 648-6289 FAX: (781) 641-7917

**Coriell Cell Repository (CCR)**

See Coriell Institute for Medical  
Research

**Coriell Institute for Medical  
Research**

Human Genetic Mutant Repository  
401 Haddon Avenue  
Camden, NJ 08103  
(856) 966-7377 FAX: (856) 964-0254  
<http://arginine.umdnl.edu>

**Corion**

8 East Forge Parkway  
Franklin, MA 02038  
(508) 528-4411 FAX: (508) 520-7583  
(800) 598-6783  
<http://www.corion.com>

**Corning and  
Corning Science Products**

P.O. Box 5000  
Corning, NY 14831  
(800) 222-7740 FAX: (607) 974-0345  
(607) 974-9000  
<http://www.corning.com>

**Costar**

See Corning

**Coulbourn Instruments**

7462 Penn Drive  
Allentown, PA 18106  
(800) 424-3771 FAX: (610) 391-1333  
(610) 395-3771  
<http://www.coulbourninst.com>

**Coulter Cytometry**

See Beckman Coulter

**Covance Research Products**

465 Swampbridge Road  
Denver, PA 17517  
(800) 345-4114 FAX: (717) 336-5344  
(717) 336-4921  
<http://www.covance.com>

**Coy Laboratory Products**

14500 Coy Drive  
Grass Lake, MI 49240  
(734) 475-2200 FAX: (734) 475-1846  
<http://www.coylab.com>

**CPG**

3 Borinski Road  
Lincoln Park, NJ 07035  
(800) 362-2740 FAX: (973) 305-0884  
(973) 305-8181  
<http://www.cpg-biotech.com>

**CPL Scientific**

43 Kingfisher Court  
Hambridge Road  
Newbury RG14 5SJ, UK  
(44) 1635-574902  
FAX: (44) 1635-529322  
<http://www.cplscientific.co.uk>

**Suppliers**

**CraMar Technologies**

8670 Wolff Court, #160  
Westminster, CO 80030  
(800) 4-TOMTEC  
<http://www.cramar.com>

**Crescent Chemical**

1324 Motor Parkway Hauppauge, NY  
11788  
(800) 877-3225 FAX: (631) 348-0913  
(631) 348-0333  
<http://www.creschem.com>

**Crist Instrument**

P.O. Box 128  
10200 Moxley Road  
Damascus, MD 20872  
(301) 253-2184 FAX: (301) 253-0069  
<http://www.cristinstrument.com>

**Cruachem**

See Annovis  
<http://www.cruachem.com>

**CS Bio**

1300 Industrial Road  
San Carlos, CA 94070  
(800) 627-2461 FAX: (415) 802-0944  
(415) 802-0880  
<http://www.csbio.com>

**CS-Chromatographie Service**

Am Parir 27  
D-52379 Langerwehe, Germany  
(49) 2423-40493-0  
FAX: (49) 2423-40493-49  
<http://www.cs-chromatographie.de>

**Cuno**

400 Research Parkway  
Meriden, CT 06450  
(800) 231-2259 FAX: (203) 238-8716  
(203) 237-5541  
<http://www.cuno.com>

**Curtin Matheson Scientific**

9999 Veterans Memorial Drive  
Houston, TX 77038  
(800) 392-3353 FAX: (713) 878-3598  
(713) 878-3500

**CWE**

124 Sibley Avenue  
Ardmore, PA 19003  
(610) 642-7719 FAX: (610) 642-1532  
<http://www.cwe-inc.com>

**Cybex Computer Products**

4991 Corporate Drive  
Huntsville, AL 35805  
(800) 932-9239 FAX: (800) 462-9239  
<http://www.cybex.com>

**Cygnus Technology**

P.O. Box 219  
Delaware Water Gap, PA 18327  
(570) 424-5701 FAX: (570) 424-5630  
<http://www.cygnustech.com>

**Cymbus Biotechnology**

Eagle Class, Chandler's Ford  
Hampshire SO53 4NF, UK  
(44) 1-703-267-676  
FAX: (44) 1-703-267-677  
<http://www.biotech.cymbus.com>

**Cytogen**

600 College Road East  
Princeton, NJ 08540  
(609) 987-8200 FAX: (609) 987-6450  
<http://www.cytogen.com>

**Cytogen Research and Development**

89 Bellevue Hill Road  
Boston, MA 02132  
(617) 325-7774 FAX: (617) 327-2405

**CytRx**

154 Technology Parkway  
Norcross, GA 30092  
(800) 345-2987 FAX: (770) 368-0622  
(770) 368-9500  
<http://www.cytrx.com>

**Dade Behring**

Corporate Headquarters  
1717 Deerfield Road  
Deerfield, IL 60015  
(847) 267-5300 FAX: (847) 267-1066  
<http://www.dadebehring.com>

**Dagan**

2855 Park Avenue  
Minneapolis, MN 55407  
(612) 827-5959 FAX: (612) 827-6535  
<http://www.dagan.com>

**Dako**

6392 Via Real  
Carpinteria, CA 93013  
(800) 235-5763 FAX: (805) 566-6688  
(805) 566-6655  
<http://www.dakousa.com>

**Dako A/S**

42 Produktionsvej  
P.O. Box 1359  
DK-2600 Glostrup, Denmark  
(45) 4492-0044 FAX: (45) 4284-1822

**Dakopatts**

See Dako A/S

**Dalton Chemical Laboratoris**

349 Wildcat Road  
Toronto, Ontario  
M3J 2S3 Canada  
(416) 661-2102 FAX: (416) 661-2108  
(800) 567-5060 (in Canada only)  
<http://www.dalton.com>

**Damon, IEC**

See Thermoquest

**Dan Kar Scientific**

150 West Street  
Wilmington, MA 01887  
(800) 942-5542 FAX: (978) 658-0380  
(978) 988-9696  
<http://www.dan-kar.com>

**DataCell**

Falcon Business Park  
40 Ivanhoe Road  
Finchampstead, Berkshire  
RG40 4QQ, UK  
(44) 1189 324324  
FAX: (44) 1189 324325  
<http://www.datacell.co.uk>  
In the US:  
(408) 446-3575 FAX: (408) 446-3589  
<http://www.datacell.com>

**DataWave Technologies**

380 Main Street, Suite 209  
Longmont, CO 80501  
(800) 736-9283 FAX: (303) 776-8531  
(303) 776-8214

**Datex-Ohmeda**

3030 Ohmeda Drive  
Madison, WI 53718  
(800) 345-2700 FAX: (608) 222-9147  
(608) 221-1551  
<http://www.us.datex-ohmeda.com>

**DATU**

82 State Street  
Geneva, NY 14456  
(315) 787-2240 FAX: (315) 787-2397  
<http://www.nysaes.cornell.edu/datu>

**David Kopf Instruments**

7324 Elmo Street  
P.O. Box 636  
Tujunga, CA 91043  
(818) 352-3274 FAX: (818) 352-3139

**Decagon Devices**

P.O. Box 835  
950 NE Nelson Court  
Pullman, WA 99163  
(800) 755-2751 FAX: (509) 332-5158  
(509) 332-2756  
<http://www.decagon.com>

**Decon Labs**

890 Country Line Road  
Bryn Mawr, PA 19010  
(800) 332-6647 FAX: (610) 964-0650  
(610) 520-0610  
<http://www.deconlabs.com>

**Decon Laboratories**

Conway Street  
Hove, Sussex BN3 3LY, UK  
(44) 1273 739241  
FAX: (44) 1273 722088

**Degussa**

Precious Metals Division  
3900 South Clinton Avenue  
South Plainfield, NJ 07080  
(800) DEGUSSA  
FAX: (908) 756-7176  
(908) 561-1100  
<http://www.degussa-huls.com>

**Deneba Software**

1150 NW 72nd Avenue  
Miami, FL 33126  
(305) 596-5644 FAX: (305) 273-9069  
<http://www.deneba.com>

**Deseret Medical**

524 West 3615 South  
Salt Lake City, UT 84115  
(801) 270-8440 FAX: (801) 293-9000

**Devcon Plexus**

30 Endicott Street  
Danvers, MA 01923  
(800) 626-7226 FAX: (978) 774-0516  
(978) 777-1100  
<http://www.devcon.com>

**Developmental Studies Hybridoma Bank**

University of Iowa  
436 Biology Building  
Iowa City, IA 52242  
(319) 335-3826 FAX: (319) 335-2077  
<http://www.uiowa.edu/~dshbwww>

**DeVilbiss**

Division of Sunrise Medical Respiratory  
100 DeVilbiss Drive  
P.O. Box 635 Somerset, PA 15501  
(800) 338-1988 FAX: (814) 443-7572  
(814) 443-4881  
<http://www.sunrisemedical.com>

**Dharmacon Research**

1376 Miners Drive #101  
Lafayette, CO 80026  
(303) 604-9499 FAX: (303) 604-9680  
<http://www.dharmacon.com>

**DiaChem**

Triangle Biomedical  
Gardiners Place  
West Gillibrands, Lancashire WN8  
9SP, UK  
(44) 1695-555581  
FAX: (44) 1695-555518  
<http://www.diachem.co.uk>

**Diaclone**

Tepnel Lifecodes Corp.  
550 West Ave.  
Stamford, CT 06902  
(888) 329-0255 FAX: (203) 328-9599  
<http://www.diaclone.com>

**Diagen**

Max-Volmer Strasse 4  
D-40724 Hilden, Germany  
(49) 2103-892-230  
FAX: (49) 2103-892-222

**Diagnostic Concepts**

6104 Madison Court  
Morton Grove, IL 60053  
(847) 604-0957

**Diagnostic Developments**

See DiaChem

**Suppliers**

**Diagnostic Instruments**

6540 Burroughs  
Sterling Heights, MI 48314  
(810) 731-6000 FAX: (810) 731-6469  
<http://www.diaginc.com>

**Diamedix**

2140 North Miami Avenue  
Miami, FL 33127  
(800) 327-4565 FAX: (305) 324-2395  
(305) 324-2300

**DiaSorin**

1990 Industrial Boulevard  
Stillwater, MN 55082  
(800) 328-1482 FAX: (651) 779-7847  
(651) 439-9719  
<http://www.diasorin.com>

**Diatome US**

321 Morris Road  
Fort Washington, PA 19034  
(800) 523-5874 FAX: (215) 646-8931  
(215) 646-1478  
<http://www.emsdiasum.com>

**Difco Laboratories**

See Becton Dickinson

**Digene**

1201 Clopper Road  
Gaithersburg, MD 20878  
(800) 344-3631 FAX: (301) 944-7121  
(301) 944-7000  
<http://www.digene.com>

**Digi-Key**

701 Brooks Avenue South  
Thief River Falls, MN 56701  
(800) 344-4539 FAX: (218) 681-3380  
(218) 681-6674  
<http://www.digi-key.com>

**Digitimer**

37 Hydeway  
Welwyn Garden City, Hertfordshire  
AL7 3BE, UK  
(44) 1707-328347  
FAX: (44) 1707-373153  
<http://www.digitimer.com>

**Dimco-Gray**

8200 South Suburban Road  
Dayton, OH 45458  
(800) 876-8353 FAX: (937) 433-0520  
(937) 433-7600  
<http://www.dimco-gray.com>

**Dionex**

1228 Titan Way  
P.O. Box 3603  
Sunnyvale, CA 94088  
(408) 737-0700 FAX: (408) 730-9403  
<http://dionex2.promptu.com>

**Display Systems Biotech**

1260 Liberty Way, Suite B  
Vista, CA 92083  
(800) 697-1111 FAX: (760) 599-9930  
(760) 599-0598  
<http://www.displaysystems.com>

**Diversified Biotech**

1208 VFW Parkway  
Boston, MA 02132  
(617) 965-8557 FAX: (617) 323-5641  
(800) 796-9199  
<http://www.divbio.com>

**DNA ProScan**

P.O. Box 121585  
Nashville, TN 37212  
(800) 841-4362 FAX: (615) 292-1436  
(615) 298-3524  
<http://www.dnapro.com>

**DNAStar**

1228 South Park Street  
Madison, WI 53715  
(608) 258-7420 FAX: (608) 258-7439  
<http://www.dnastar.com>

**DNAVIEW**

Attn: Charles Brenner  
<http://www.wco.com>  
~cbrenner/dnaview.htm

**Doall NYC**

36-06 48th Avenue  
Long Island City, NY 11101  
(718) 392-4595 FAX: (718) 392-6115  
<http://www.doall.com>

**Dojindo Molecular Technologies**

211 Perry Street Parkway, Suite 5  
Gaithersburg, MD 20877  
(877) 987-2667  
<http://www.dojindo.com>

**Dolla Eastern**

See Doall NYC

**Dolan Jenner Industries**

678 Andover Street  
Lawrence, MA 08143  
(978) 681-8000 (978) 682-2500  
<http://www.dolan-jenner.com>

**Dow Chemical**

Customer Service Center  
2040 Willard H. Dow Center  
Midland, MI 48674  
(800) 232-2436 FAX: (517) 832-1190  
(409) 238-9321  
<http://www.dow.com>

**Dow Corning**

Northern Europe  
Meriden Business Park  
Copse Drive  
Allesley, Coventry CV5 9RG, UK  
(44) 1676 528 000  
FAX: (44) 1676 528 001

**Dow Corning**

P.O. Box 994  
Midland, MI 48686  
(517) 496-4000  
<http://www.dowcorning.com>

**Dow Corning (Lubricants)**

2200 West Salzburg Road  
Auburn, MI 48611  
(800) 248-2481 FAX: (517) 496-6974  
(517) 496-6000

**Dremel**

4915 21st Street  
Racine, WI 53406  
(414) 554-1390  
<http://www.dremel.com>

**Drummond Scientific**

500 Parkway  
P.O. Box 700  
Broomall, PA 19008  
(800) 523-7480 FAX: (610) 353-6204  
(610) 353-0200  
<http://www.drummondsci.com>

**Duchefa Biochemie BV**

P.O. Box 2281  
2002 CG Haarlem, The Netherlands  
31-0-23-5319093  
FAX: 31-0-23-5318027  
<http://www.duchefa.com>

**Duke Scientific**

2463 Faber Place  
Palo Alto, CA 94303  
(800) 334-3883 FAX: (650) 424-1158  
(650) 424-1177  
<http://www.dukescientific.com>

**Duke University Marine Laboratory**

135 Duke Marine Lab Road  
Beaufort, NC 28516-9721  
(252) 504-7503 FAX: (252) 504-7648  
<http://www.env.duke.edu/marinelab>

**DuPont Biotechnology Systems**

See NEN Life Science Products

**DuPont Medical Products**

See NEN Life Science Products

**DuPont Merck Pharmaceuticals**

331 Treble Cove Road  
Billerica, MA 01862  
(800) 225-1572 FAX: (508) 436-7501  
<http://www.dupontmerck.com>

**DuPont NEN Products**

See NEN Life Science Products

**Dynal**

5 Delaware Drive  
Lake Success, NY 11042  
(800) 638-9416 FAX: (516) 326-3298  
(516) 326-3270  
<http://www.dynal.net>

**Dynal AS**

Ullernchausen 52,  
0379 Oslo, Norway  
47-22-06-10-00 FAX: 47-22-50-70-15  
<http://www.dynal.no>

**Dynalab**

P.O. Box 112  
Rochester, NY 14692  
(800) 828-6595 FAX: (716) 334-9496  
(716) 334-2060  
<http://www.dynalab.com>

**Dynarex**

1 International Boulevard  
Brewster, NY 10509  
(888) DYNAREX  
FAX: (914) 279-9601  
(914) 279-9600  
<http://www.dynarex.com>

**Dynatech**

See Dynex Technologies

**Dynex Technologies**

14340 Sullyfield Circle  
Chantilly, VA 22021  
(800) 336-4543 FAX: (703) 631-7816  
(703) 631-7800  
<http://www.dynex technologies.com>

**Dyno Mill**

See Willy A. Bachofen

**E.S.A.**

22 Alpha Road  
Chelmsford, MA 01824  
(508) 250-7000 FAX: (508) 250-7090

**E.W. Wright**

760 Durham Road  
Guilford, CT 06437  
(203) 453-6410 FAX: (203) 458-6901  
<http://www.ewwright.com>

**E-Y Laboratories**

107 N. Amphlett Boulevard  
San Mateo, CA 94401  
(800) 821-0044 FAX: (650) 342-2648  
(650) 342-3296  
<http://www.eylabs.com>

**Eastman Kodak**

1001 Lee Road  
Rochester, NY 14650  
(800) 225-5352 FAX: (800) 879-4979  
(716) 722-5780 FAX: (716) 477-8040  
<http://www.kodak.com>

**ECACC**

See European Collection of Animal  
Cell Cultures

**EC Apparatus**

See Savant/EC Apparatus

**Ecogen, SRL**

Gensura Laboratories  
Ptge. Dos de Maig  
9(08041) Barcelona, Spain  
(34) 3-450-2601  
FAX: (34) 3-456-0607  
<http://www.ecogen.com>

**Ecolab**

370 North Wabasha Street  
St. Paul, MN 55102  
(800) 35-CLEAN  
FAX: (651) 225-3098  
(651) 352-5326  
<http://www.ecolab.com>

**Suppliers**

**ECO PHYSICS**

3915 Research Park Drive, Suite A-3  
Ann Arbor, MI 48108  
(734) 998-1600 FAX: (734) 998-1180  
<http://www.ecophysics.com>

**Edge Biosystems**

19208 Orbit Drive  
Gaithersburg, MD 20879-4149  
(800) 326-2685 FAX: (301) 990-0881  
(301) 990-2685  
<http://www.edgebio.com>

**Edmund Scientific**

101 E. Gloucester Pike  
Barrington, NJ 08007  
(800) 728-6999 FAX: (856) 573-6263  
(856) 573-6250  
<http://www.edsci.com>

**EG&G**

See Perkin-Elmer

**Etagen**

969 C Industry Road  
San Carlos, CA 94070  
(650) 592-4500 FAX: (650) 592-4500

**Elcotech**

P.O. Box 10935  
Winston-Salem, NC 27108  
(336) 544-8613 FAX: (336) 777-3623  
(910) 777-3624  
<http://www.elcotech.com>

**Electron Microscopy Sciences**

321 Morris Road  
Fort Washington, PA 19034  
(800) 523-5874 FAX: (215) 646-8931  
(215) 646-1566  
<http://www.emsdiasum.com>

**Electron Tubes**

100 Forge Way, Unit F  
Rockaway, NJ 07866  
(800) 521-8382 FAX: (973) 586-9771  
(973) 586-9594  
<http://www.electrontubes.com>

**Elicay Laboratory Products,  
(UK) Ltd.**

4 Manborough Mews  
Crockford Lane  
Basingstoke, Hampshire  
RG 248NA, England  
(256) 811-118 FAX: (256) 811-116  
<http://www.elkay-uk.co.uk>

**Eli Lilly**

Lilly Corporate Center  
Indianapolis, IN 46285  
(800) 545-5979 FAX: (317) 276-2095  
(317) 276-2000  
<http://www.lilly.com>

**ELISA Technologies**

See Neogen

**Elkins-Sinn**

See Wyeth-Ayerst

**EMBI**

See European Bioinformatics Institute

**EM Science**

480 Democrat Road  
Gibbstown, NJ 08027  
(800) 222-0342 FAX: (856) 423-4389  
(856) 423-6300  
<http://www.emscience.com>

**EM Separations Technology**

See R & S Technology

**Endogen**

30 Commerce Way  
Woburn, MA 01801  
(800) 487-4885 FAX: (617) 439-0355  
(781) 937-0890  
<http://www.endogen.com>

**ENGEL-Loter**

HSGM Heatcutting Equipment  
& Machines  
1865 E. Main Street, No. 5  
Duncan, SC 29334  
(888) 854-HSGM  
FAX: (864) 486-8383  
(864) 486-8300  
<http://www.engelgmbh.com>

**Enzo Diagnostics**

60 Executive Boulevard  
Farmingdale, NY 11735  
(800) 221-7705 FAX: (516) 694-7501  
(516) 694-7070  
<http://www.enzo.com>

**Enzogenetics**

4197 NW Douglas Avenue  
Corvallis, OR 97330  
(541) 757-0288

**The Enzyme Center**

See Charm Sciences

**Enzyme Systems Products**

486 Lindbergh Avenue  
Livermore, CA 94550  
(888) 449-2664 FAX: (925) 449-1866  
(925) 449-2664  
<http://www.enzymesys.com>

**Epicentre Technologies**

1402 Emil Street  
Madison, WI 53713  
(800) 284-8474 FAX: (608) 258-3088  
(608) 258-3080  
<http://www.epicentre.com>

**Erie Scientific**

20 Post Road  
Portsmouth, NH 03801  
(888) ERIE-SCI FAX: (603) 431-8996  
(603) 431-8410  
<http://www.eriesci.com>

**Erithacus Software Ltd.**

P.O. Box 274  
Horley, Surrey RH6 9YJ, UK  
44 (0) 1342-841938  
FAX: 44 (0) 1342-841939  
<http://www.erithacus.com>

**ES Industries**

701 South Route 73  
West Berlin, NJ 08091  
(800) 356-6140 FAX: (856) 753-8484  
(856) 753-8400  
<http://www.esind.com>

**ESA**

22 Alpha Road  
Chelmsford, MA 01824  
(800) 959-5095 FAX: (978) 250-7090  
(978) 250-7000  
<http://www.esainc.com>

**Ethicon**

Route 22, P.O. Box 151  
Somerville, NJ 08876  
(908) 218-0707  
<http://www.ethiconinc.com>

**Ethicon Endo-Surgery**

4545 Creek Road  
Cincinnati, OH 45242  
(800) 766-9534 FAX: (513) 786-7080

**Eurogentec**

Parc Scientifique du Sart Tilman  
4102 Seraing, Belgium  
32-4-240-76-76 FAX: 32-4-264-07-88  
<http://www.eurogentec.com>

**European Bioinformatics Institute**

Wellcome Trust Genomes Campus  
Hinxton, Cambridge CB10 1SD, UK  
(44) 1223-49444  
FAX: (44) 1223-494468

**European Collection of Animal**

Cell Cultures (ECACC)  
Centre for Applied Microbiology &  
Research  
Salisbury, Wiltshire SP4 0JG, UK  
(44) 1980-612 512  
FAX: (44) 1980-611 315  
<http://www.camr.org.uk>

**Evergreen Scientific**

2254 E. 49th Street  
P.O. Box 58248  
Los Angeles, CA 90058  
(800) 421-6261 FAX: (323) 581-2503  
(323) 583-1331  
<http://www.evergreensci.com>

**Exalpha Biologicals**

20 Hampden Street  
Boston, MA 02205  
(800) 395-1137 FAX: (617) 969-3872  
(617) 558-3625  
<http://www.exalpha.com>

**Exciton**

P.O. Box 31126  
Dayton, OH 45437  
(937) 252-2989 FAX: (937) 258-3937  
<http://www.exciton.com>

**Extrasynthese**

ZI Lyon Nord  
SA-BP62  
69730 Genay, France  
(33) 78-98-20-34  
FAX: (33) 78-98-19-45

**Factor II**

1972 Forest Avenue  
P.O. Box 1339  
Lakeside, AZ 85929  
(800) 332-8688 FAX: (520) 537-8066  
(520) 537-8387  
<http://www.factor2.com>

**Falcon**

See Becton Dickinson Labware

**Faxitron X-Ray Corporation**

225 Larkin Drive, Unit 1  
Wheeling, IL 60090  
(847) 465-9729 FAX: (847) 465-9740  
<http://www.faxitron.com>

**Fenwal**

See Baxter Healthcare

**Filemaker**

5201 Patrick Henry Drive  
Santa Clara, CA 95054  
(800) 325-2747 (408) 987-7000

**Fine Science Tools**

202-277 Mountain Highway  
North Vancouver, British Columbia  
V7J 3P2 Canada  
(800) 665-5355 FAX: (800) 665 4544  
(604) 980-2481 FAX: (604) 987-3299

**Fine Science Tools**

373-G Vintage Park Drive  
Foster City, CA 94404  
(800) 521-2109 FAX: (800) 523-2109  
(650) 349-1636 FAX: (630) 349-3729

**Fine Science Tools**

Fahrtgasse 7-13  
D-69117 Heidelberg, Germany  
(49) 6221 905050  
FAX: (49) 6221 600001  
<http://www.finescience.com>

**Finn Aqua**

AMSCO Finn Aqua Oy  
Teollisuustie, FIN-04300  
Tuusula, Finland  
358 025851 FAX: 358 0276019

**Finnigan**

355 River Oaks Parkway  
San Jose, CA 95134  
(408) 433-4800 FAX: (408) 433-4821  
<http://www.finnigan.com>

**Dr. L. Fisher**

Lutherstrasse 25A  
D-69120 Heidelberg  
Germany  
(49) 6221-16-0368  
[http://home.eplus-online.de/  
electroporation](http://home.eplus-online.de/electroporation)

**Suppliers**

**Fisher Chemical Company**

Fisher Scientific Limited  
112 Colonnade Road Nepean  
Ontario K2E 7L6, Canada  
(800) 234-7437 FAX: (800) 463-2996  
<http://www.fisherscientific.com>

**Fisher Scientific**

2000 Park Lane  
Pittsburgh, PA 15275  
(800) 766-7000 FAX: (800) 926-1166  
(412) 562-8300  
<http://www3.fishersci.com>

**W.F. Fisher & Son**

220 Evans Way, Suite #1  
Somerville, NJ 08876  
(908) 707-4050 FAX: (908) 707-4099

**Fitzco**

5600 Pioneer Creek Drive  
Maple Plain, MN 55359  
(800) 367-8760 FAX: (612) 479-2880  
(612) 479-3489  
<http://www.fitzco.com>

**5 Prime → 3 Prime**

See 2000 Eppendorf-5 Prime  
<http://www.5prime.com>

**Flambeau**

15981 Valplast Road  
Middlefield, Ohio 44062  
(800) 232-3474 FAX: (440) 632-1581  
(440) 632-1631  
<http://www.flambeau.com>

**Fleisch (Rusch)**

2450 Meadowbrook Parkway  
Duluth, GA 30096  
(770) 623-0816 FAX: (770) 623-1829  
<http://ruschinc.com>

**Flow Cytometry Standards**

P.O. Box 194344  
San Juan, PR 00919  
(800) 227-8143 FAX: (787) 758-3267  
(787) 753-9341  
<http://www.fcstd.com>

**Flow Labs**

See ICN Biomedicals

**Flow-Tech Supply**

P.O. Box 1388  
Orange, TX 77631  
(409) 882-0306 FAX: (409) 882-0254  
<http://www.flow-tech.com>

**Fluid Marketing**

See Fluid Metering

**Fluid Metering**

5 Aerial Way, Suite 500  
Sayosett, NY 11791  
(516) 922-6050 FAX: (516) 624-8261  
<http://www.fmipump.com>

**Fluorochrome**

1801 Williams, Suite 300  
Denver, CO 80264  
(303) 394-1000 FAX: (303) 321-1119

**Fluka Chemical**

See Sigma-Aldrich

**FMC BioPolymer**

1735 Market Street  
Philadelphia, PA 19103  
(215) 299-6000 FAX: (215) 299-5809  
<http://www.fmc.com>

**FMC BioProducts**

191 Thomaston Street  
Rockland, ME 04841  
(800) 521-0390 FAX: (800) 362-1133  
(207) 594-3400 FAX: (207) 594-3426  
<http://www.bioproducts.com>

**Forma Scientific**

Milcreek Road  
P.O. Box 649  
Marietta, OH 45750  
(800) 848-3080 FAX: (740) 372-6770  
(740) 373-4765  
<http://www.forma.com>

**Fort Dodge Animal Health**

800 5th Street NW  
Fort Dodge, IA 50501  
(800) 685-5656 FAX: (515) 955-9193  
(515) 955-4600  
<http://www.ahp.com>

**Fotodyne**

950 Walnut Ridge Drive  
Hartland, WI 53029  
(800) 362-3686 FAX: (800) 362-3642  
(262) 369-7000 FAX: (262) 369-7013  
<http://www.fotodyne.com>

**Fresenius HemoCare**

6675 185th Avenue NE, Suite 100  
Redwood, WA 98052  
(800) 909-3872  
(425) 497-1197  
<http://www.freseniusht.com>

**Fresenius Hemotechnology**

See Fresenius HemoCare

**Fuji Medical Systems**

419 West Avenue  
P.O. Box 120035  
Stamford, CT 06902  
(800) 431-1850 FAX: (203) 353-0926  
(203) 324-2000  
<http://www.fujimed.com>

**Fujisawa USA**

Parkway Center North  
Deerfield, IL 60015-2548  
(847) 317-1088 FAX: (847) 317-7298

**Ernest F. Fullam**

900 Albany Shaker Road  
Latham, NY 12110  
(800) 833-4024 FAX: (518) 785-8647  
(518) 785-5533  
<http://www.fullam.com>

**Gallard-Schlesinger Industries**

777 Zechendorf Boulevard  
Garden City, NY 11530  
(516) 229-4000 FAX: (516) 229-4015  
<http://www.gallard-schlessinger.com>

**Gambro**

Box 7373  
SE 103 91 Stockholm, Sweden  
(46) 8 613 65 00  
FAX: (46) 8 611 37 31  
In the US: COBE Laboratories  
225 Union Boulevard  
Lakewood, CO 80215  
(303) 232-6800 FAX: (303) 231-4915  
<http://www.gambro.com>

**Garner Glass**

177 Indian Hill Boulevard  
Claremont, CA 91711  
(909) 624-5071 FAX: (909) 625-0173  
<http://www.garnerglass.com>

**Garon Plastics**

16 Byre Avenue  
Somerton Park, South Australia 5044  
(08) 8294-5126 FAX: (08) 8376-1487  
<http://www.apache.airnet.com.au/~garon>

**Garren Scientific**

9400 Lurline Avenue, Unit E  
Chatsworth, CA 91311  
(800) 342-3725 FAX: (818) 882-3229  
(818) 882-6544  
<http://www.garren-scientific.com>

**GATC Biotech AG**

Jakob-Stadler-Platz 7  
D-78467 Constance, Germany  
(49) 07531-8160-0  
FAX: (49) 07531-8160-81  
<http://www.gatc-biotech.com>

**Gaussian**

Carnegie Office Park  
Building 6, Suite 230  
Carnegie, PA 15106  
(412) 279-6700 FAX: (412) 279-2118  
<http://www.gaussian.com>

**G.C. Electronics/A.R.C. Electronics**

431 Second Street  
Henderson, KY 42420  
(270) 827-8981 FAX: (270) 827-8256  
<http://www.arcelectronics.com>

**GDB (Genome Data Base, Curation)**

2024 East Monument Street  
Suite 1200  
Baltimore, MD 21205  
(410) 955-9705 FAX: (410) 614-0434  
<http://www.gdb.org>

**GDB (Genome Data Base, Home)**

Hospital for Sick Children  
555 University Avenue  
Toronto, Ontario  
M5G 1X8 Canada  
(416) 813-8744 FAX: (416) 813-8755  
<http://www.gdb.org>

**Gelman Sciences**

See Pall-Gelman

**Gemini BioProducts**

5115-M Douglas Fir Road  
Calabasas, CA 90403  
(818) 591-3530 FAX: (818) 591-7084

**Gen Trak**

5100 Campus Drive  
Plymouth Meeting, PA 19462  
(800) 221-7407 FAX: (215) 941-9498  
(215) 825-5115  
<http://www.informagen.com>

**Genaissance Pharmaceuticals**

5 Science Park  
New Haven, CT 06511  
(800) 678-9487 FAX: (203) 562-9377  
(203) 773-1450  
<http://www.genaissance.com>

**GENAXIS Biotechnology**

Parc Technologique  
10 Avenue Ampère  
Montigny le Bretonneux  
78180 France  
(33) 01-30-14-00-20  
FAX: (33) 01-30-14-00-15  
<http://www.genaxis.com>

**GenBank**

National Center for Biotechnology  
Information  
National Library of Medicine/NIH  
Building 38A, Room 8N805  
8600 Rockville Pike  
Bethesda, MD 20894  
(301) 496-2475 FAX: (301) 480-9241  
<http://www.ncbi.nlm.nih.gov>

**Gene Codes**

640 Avis Drive  
Ann Arbor, MI 48108  
(800) 497-4939 FAX: (734) 930-0145  
(734) 769-7249  
<http://www.genecodes.com>

**Genemachines**

935 Washington Street  
San Carlos, CA 94070  
(650) 508-1634 FAX: (650) 508-1644  
(877) 855-4363  
<http://www.genemachines.com>

**Genentech**

1 DNA Way  
South San Francisco, CA 94080  
(800) 551-2231 FAX: (650) 225-1600  
(650) 225-1000  
<http://www.gene.com>

**General Scanning/GSI Luminomics**

500 Arsenal Street  
Watertown, MA 02172  
(617) 924-1010 FAX: (617) 924-7327  
<http://www.genescan.com>

**Suppliers**

**General Valve**

Division of Parker Hannifin Pneutronics  
19 Gloria Lane  
Fairfield, NJ 07004  
(800) GVC-VALV  
FAX: (800) GVC-1-FAX  
<http://www.pneutronics.com>

**Genespan**

19310 North Creek Parkway, Suite 100  
Bothell, WA 98011  
(800) 231-2215 FAX: (425) 482-3005  
(425) 482-3003  
<http://www.genespan.com>

**Gene Therapy Systems**

10190 Telesis Court  
San Diego, CA 92122  
(858) 457-1919 FAX: (858) 623-9494  
<http://www.genetherapysystems.com>

**Généthon Human Genome**

Research Center  
1 bis rue de l'Internationale  
91000 Evry, France  
(33) 169-472828  
FAX: (33) 607-78698  
<http://www.genethon.fr>

**Genetic Microsystems**

34 Commerce Way  
Woburn, MA 01801  
(781) 932-9333 FAX: (781) 932-9433  
<http://www.geneticmicro.com>

**Genetic Mutant Repository**

See Coriell Institute for Medical  
Research

**Genetic Research Instrumentation**

Gene House  
Queenborough Lane  
Rayne, Braintree, Essex CM7 8TF, UK  
(44) 1376 332900  
FAX: (44) 1376 344724  
<http://www.gri.co.uk>

**Genetics Computer Group**

575 Science Drive  
Madison, WI 53711  
(608) 231-5200 FAX: (608) 231-5202  
<http://www.gcg.com>

**Genetics Institute/American Home Products**

87 Cambridge Park Drive  
Cambridge, MA 02140  
(617) 876-1170 FAX: (617) 876-0388  
<http://www.genetics.com>

**Genetix**

63-69 Somerford Road  
Christchurch, Dorset BH23 3QA, UK  
(44) (0) 1202 483900  
FAX: (44)(0) 1202 480289  
In the US: (877) 436 3849  
US FAX: (888) 522 7499  
<http://www.genetix.co.uk>

**Gene Tools**

One Summertown Way  
Philomath, OR 97370  
(541) 9292-7840  
FAX: (541) 9292-7841  
<http://www.gene-tools.com>

**GeneWorks**

P.O. Box 11, Rundle Mall  
Adelaide, South Australia 5000,  
Australia  
1800 882 555 FAX: (08) 8234 2699  
(08) 8234 2644  
<http://www.geneworks.com>

**Genome Systems (INCYTE)**

4633 World Parkway Circle  
St. Louis, MO 63134  
(800) 430-0030 FAX: (314) 427-3324  
(314) 427-3222  
<http://www.genomesystems.com>

**Genomic Solutions**

4355 Varsity Drive, Suite E  
Ann Arbor, MI 48108  
(877) GENOMIC  
FAX: (734) 975-4808  
(734) 975-4800  
<http://www.genomicsolutions.com>

**Genomxy**

See Beckman Coulter

**Genosys Biotechnologies**

1442 Lake Front Circle, Suite 185  
The Woodlands, TX 77380  
(281) 363-3693 FAX: (281) 363-2212  
<http://www.genosys.com>

**Genotech**

92 Weldon Parkway  
St. Louis, MO 63043  
(800) 628-7730 FAX: (314) 991-1504  
(314) 991-6034

**GENSET**

876 Prospect Street, Suite 206  
La Jolla, CA 92037  
(800) 551-5291 FAX: (619) 551-2041  
(619) 515-3061  
<http://www.genset.fr>

**Genisia Laboratories Ltd.**

19 Hughes  
Irvine, CA 92718  
(714) 455-4700 FAX: (714) 855-8210

**Genta**

99 Hayden Avenue, Suite 200  
Lexington, MA 02421  
(781) 860-5150 FAX: (781) 860-5137  
<http://www.genta.com>

**GENTEST**

6 Henshaw Street  
Woburn, MA 01801  
(800) 334-5229 FAX: (888) 242-2226  
(781) 935-5115 FAX: (781) 932-6855  
<http://www.gentest.com>

**Genra Systems**

15200 25th Avenue N., Suite 104  
Minneapolis, MN 55447  
(800) 866-3039 FAX: (612) 476-5850  
(612) 476-5858  
<http://www.genra.com>

**Genzyme**

1 Kendall Square  
Cambridge, MA 02139  
(617) 252-7500 FAX: (617) 252-7600  
<http://www.genzyme.com>  
See also R&D Systems

**Genzyme Genetics**

One Mountain Road  
Framingham, MA 01701  
(800) 255-7357 FAX: (508) 872-9080  
(508) 872-8400  
<http://www.genzyme.com>

**George Tiemann & Co.**

25 Plant Avenue  
Hauppauge, NY 11788  
(516) 273-0005 FAX: (516) 273-6199

**GIBCO/BRL**

A Division of Life Technologies  
1 Kendall Square  
Grand Island, NY 14072  
(800) 874-4226 FAX: (800) 352-1968  
(716) 774-6700  
<http://www.lifetech.com>

**Gilmont Instruments**

A Division of Barnant Company  
28N092 Commercial Avenue  
Barrington, IL 60010  
(800) 637-3739 FAX: (708) 381-7053  
<http://barnant.com>

**Gilson**

3000 West Beltline Highway  
P.O. Box 620027  
Middletown, WI 53562  
(800) 445-7661  
(608) 836-1551  
<http://www.gilson.com>

**Glas-Col Apparatus**

P.O. Box 2128  
Terre Haute, IN 47802  
(800) Glas-Col FAX: (812) 234-6975  
(812) 235-6167  
<http://www.glascol.com>

**Glaxo Wellcome**

Five Moore Drive  
Research Triangle Park, NC 27709  
(800) SGL-AXO5  
FAX: (919) 248-2386  
(919) 248-2100  
<http://www.glaxowellcome.com>

**Glen Mills**

395 Allwood Road  
Clifton, NJ 07012  
(973) 777-0777 FAX: (973) 777-0070  
<http://www.glenmills.com>

**Glen Research**

22825 Davis Drive  
Sterling, VA 20166  
(800) 327-4536 FAX: (800) 934-2490  
(703) 437-6191 FAX: (703) 435-9774  
<http://www.glenresearch.com>

**Glo Germ**

P.O. Box 189  
Moab, UT 84532  
(800) 842-6622 FAX: (435) 259-5930  
<http://www.glogerm.com>

**Glyco**

11 Pimentel Court  
Novato, CA 94949  
(800) 722-2597 FAX: (415) 382-3511  
(415) 884-6799  
<http://www.glyco.com>

**Gould Instrument Systems**

8333 Rockside Road  
Valley View, OH 44125  
(216) 328-7000 FAX: (216) 328-7400  
<http://www.gould13.com>

**Gradipore Ltd.**

P.O. Box 6126  
22 Rodborough Road  
Frenchs Forest NSW 2086  
Australia  
(61) 2-8977-9000  
FAX: (61) 2-8977-9099  
<http://www.gradipore.com>

**Gralab Instruments**

See Dimco-Gray

**GraphPad Software**

5755 Oberlin Drive #110  
San Diego, CA 92121  
(800) 388-4723 FAX: (558) 457-8141  
(558) 457-3909  
<http://www.graphpad.com>

**Graseby Anderson**

See Andersen Instruments  
<http://www.graseby.com>

**Grass Instrument**

A Division of Astro-Med  
600 East Greenwich Avenue  
W. Warwick, RI 02893  
(800) 225-5167 FAX: (877) 472-7749  
<http://www.grassinstruments.com>

**Greenacre and Misac Instruments**

Misac Systems  
27 Port Wood Road  
Ware, Hertfordshire SF12 9NJ, UK  
(44) 1920 463017  
FAX: (44) 1920 465136

**Greer Labs**

639 Nuway Circle  
Lenoir, NC 28645  
(704) 754-5237  
<http://greerlabs.com>

**Suppliers**

**Greiner**  
Maybachstrasse 2  
Postfach 1162  
D-7443 Frickenhausen, Germany  
(49) 0 91 31/80 79 0  
FAX: (49) 0 91 31/80 79 30  
<http://www.erlangen.com/greiner>

**GSI Lumonics**  
130 Lombard Street Oxnard, CA 93030  
(805) 485-5559 FAX: (805) 485-3310  
<http://www.gsilumonics.com>

**GTE Internetworking**  
150 Cambridge Park Drive  
Cambridge, MA 02140  
(800) 472-4565 FAX: (508) 694-4861  
<http://www.bbn.com>

**GW Instruments**  
35 Medford Street  
Somerville, MA 02143  
(617) 625-4096 FAX: (617) 625-1322  
<http://www.gwinst.com>

**H & H Woodworking**  
1002 Garfield Street  
Denver, CO 80206  
(303) 394-3764

**Hacker Instruments**  
17 Sherwood Lane  
P.O. Box 10033  
Fairfield, NJ 07004  
800-442-2537 FAX: (973) 808-8281  
(973) 226-8450  
<http://www.hackerinstruments.com>

**Haemenetics**  
400 Wood Road  
Braintree, MA 02184  
(800) 225-5297 FAX: (781) 848-7921  
(781) 848-7100  
<http://www.haemenetics.com>

**Halocarbon Products**  
P.O. Box 661  
River Edge, NJ 07661  
(201) 242-8899 FAX: (201) 262-0019  
<http://halocarbon.com>

**Hamamatsu Photonic Systems**  
A Division of Hamamatsu  
360 Foothill Road  
P.O. Box 6910  
Bridgewater, NJ 08807  
(908) 231-1116 FAX: (908) 231-0852  
<http://www.photoniconline.com>

**Hamilton Bonaduz AG**  
Via Crusch 8  
7402 Bonaduz  
Switzerland  
41-81-660-60-60  
FAX: 41-81-660-60-70  
<http://www.hamilton.ch>

**Hamilton Company**  
4970 Energy Way  
P.O. Box 10030  
Reno, NV 89520  
(800) 648-5950 FAX: (775) 856-7259  
(775) 858-3000  
<http://www.hamiltoncompany.com>

**Hamilton Thorne Biosciences**  
100 Cummings Center, Suite 102C  
Beverly, MA 01915  
<http://www.hamiltonthorne.com>

**Hampton Research**  
27631 El Lazo Road  
Laguna Niguel, CA 92677  
(800) 452-3899 FAX: (949) 425-1611  
(949) 425-6321  
<http://www.hamptonresearch.com>

**Harlan Bioproducts for Science**  
P.O. Box 29176  
Indianapolis, IN 46229  
(317) 894-7521 FAX: (317) 894-1840  
<http://www.hbps.com>

**Harlan Sera-Lab**  
Hillcrest, Dodgeford Lane  
Belton, Loughborough  
Leicester LE12 9TE, UK  
(44) 1530 222123  
FAX: (44) 1530 224970  
<http://www.harlan.com>

**Harlan Teklad**  
P.O. Box 44220  
Madison, WI 53744  
(608) 277-2070 FAX: (608) 277-2066  
<http://www.harlan.com>

**Harrick Scientific Corporation**  
88 Broadway  
Ossining, NY 10562  
(914) 762-0020 FAX: (914) 762-0914  
<http://www.harricksci.com>

**Harrison Research**  
840 Moana Court  
Palo Alto, CA 94306  
(650) 949-1565 FAX: (650) 948-0493

**Harvard Apparatus**  
84 October Hill Road  
Holliston, MA 01746  
(800) 272-2775 FAX: (508) 429-5732  
(508) 893-8999  
<http://harvardapparatus.com>

**Harvard Bioscience**  
See Harvard Apparatus

**Haselton Biologics**  
See JRH Biosciences

**H. Hauptner & Richard Heberholtz GmbH & Co.RG**  
Kuller Strasse 38-44  
42651 Solingen  
Germany  
49-(0)-212-2501-116  
FAX: 49 (0) 212-2501-136  
<http://www.hauptner-heberholtz.de>

**Hazelton Research Products**  
See Covance Research Products

**Health Products**  
See Pierce Chemical

**Heat Systems-Ultrasonics**  
1938 New Highway  
Farmingdale, NY 11735  
(800) 645-9846 FAX: (516) 694-9412  
(516) 694-9555

**Heidenhain Corp**  
333 East State Parkway  
Schaumburg, IL 60173  
(847) 490-1191 FAX: (847) 490-3931  
<http://www.heidenhain.com>

**Hellma Cells**  
11831 Queens Boulevard  
Forest Hills, NY 11375  
(718) 544-9166 FAX: (718) 263-6910  
<http://www.hellmaUSA.com>

**Hellma**  
Postfach 1163  
D-79371 Müllheim/Baden, Germany  
(49) 7631-1820  
FAX: (49) 7631-13546  
<http://www.hellma-worldwide.de>

**Henry Schein**  
135 Duryea Road, Mail Room 150  
Melville, NY 11747  
(800) 472-4346 FAX: (516) 843-5652  
<http://www.henryschein.com>

**Heraeus Kulzer**  
4315 South Lafayette Boulevard  
South Bend, IN 46614  
(800) 343-5336  
(219) 291-0661  
<http://www.kulzer.com>

**Heraeus Sepatech**  
See Kendro Laboratory Products

**Hercules Aqualon**  
Aqualon Division  
Hercules Research Center, Bldg. 8145  
500 Hercules Road  
Wilmington, DE 19899  
(800) 345-0447 FAX: (302) 995-4787  
<http://www.herc.com/aqualon/pharma>

**Heto-Holten A/S**  
Gydevang 17-19  
DK-3450 Allerød, Denmark  
(45) 48-16-62-00  
FAX: (45) 48-16-62-97  
Distributed by ATR

**Hettich-Zentrifugen**  
See Andreas Hettich

**Hewlett-Packard**  
3000 Hanover Street  
Mailstop 20B3  
Palo Alto, CA 94304  
(650) 857-1501 FAX: (650) 857-5518  
<http://www.hp.com>

**HGS Hinimoto Plastics**  
1-10-24 Meguro-Honcho  
Meguro-ku  
Tokyo 152, Japan  
3-3714-7226 FAX: 3-3714-4657

**Hitachi Scientific Instruments**  
Nissei Sangyo America  
8100 N. First Street  
San Elsa, CA 95314  
(800) 548-9001 FAX: (408) 432-0704  
(408) 432-0520  
<http://www.hii.hitachi.com>

**Hi-Tech Scientific**  
Brunel Road  
Salisbury, Wiltshire, SP2 7PU  
UK  
(44) 1722-432320  
(800) 344-0724 (US only)  
<http://www.hi-techsci.co.uk>

**Hoechst AG**  
See Aventis Pharmaceutical

**Hoerfer Scientific Instruments**  
Division of Amersham-Pharmacia  
Biotech  
800 Centennial Avenue  
Piscataway, NJ 08855  
(800) 227-4750 FAX: (877) 295-8102  
<http://www.apbiotech.com>

**Hoffman-LaRoche**  
340 Kingsland Street  
Nutley, NJ 07110  
(800) 526-0189 FAX: (973) 235-9605  
(973) 235-5000  
<http://www.rocheUSA.com>

**Holborn Surgical and Medical Instruments**  
Westwood Industrial Estate  
Ramsgate Road Margate, Kent  
CT9 4JZ UK  
(44) 1843 296666  
FAX: (44) 1843 295446

**Honeywell**  
101 Columbia Road  
Morristown, NJ 07962  
(973) 455-2000 FAX: (973) 455-4807  
<http://www.honeywell.com>

**Honeywell Specialty Films**  
P.O. Box 1039  
101 Columbia Road  
Morristown, NJ 07962  
(800) 934-5679 FAX: (973) 455-6045  
<http://www.honeywell-specialtyfilms.com>

**Hood Thermo-Pad Canada**  
Comp. 20, Site 61A, RRR2  
Summerland, British Columbia  
V0H 1Z0 Canada  
(800) 665-9555 FAX: (250) 494-5003  
(250) 494-5002  
<http://www.thermopad.com>

## Suppliers

**Horiba Instruments**

17671 Armstrong Avenue  
Irvine, CA 92714  
(949) 250-4811 FAX: (949) 250-0924  
<http://www.horiba.com>

**Hoskins Manufacturing**

10776 Hall Road  
P.O. Box 218  
Hamburg, MI 48139  
(810) 231-1900 FAX: (810) 231-4311  
<http://www.hoskinsmfgco.com>

**Hosokawa Micron Powder Systems**

10 Chatham Road  
Summit, NJ 07901  
(800) 526-4491 FAX: (908) 273-7432  
(908) 273-6360  
<http://www.hosokawamicron.com>

**HT Biotechnology**

Unit 4  
61 Ditton Walk  
Cambridge CB5 8QD, UK  
(44) 1223-412583

**Hugo Sachs Electronik**

Postfach 138  
7806 March-Hugstetten, Germany  
D-79229(49) 7665-92000  
FAX: (49) 7665-920090

**Human Biologicals International**

7150 East Camelback Road, Suite 245  
Scottsdale, AZ 85251  
(480) 990-2005 FAX: (480)-990-2155  
<http://www.humanbiological.com>

**Human Genetic Mutant Cell**

Repository  
See Coriell Institute for Medical  
Research

**HVS Image**

P.O. Box 100  
Hampton, Middlesex TW12 2YD, UK  
FAX: (44) 208 783 1223  
In the US: (800) 225-9261  
FAX: (888) 483-8033  
<http://www.hvsimage.com>

**Hybaid**

111-113 Waldegrave Road  
Teddington, Middlesex TW11 8LL, UK  
(44) 0 1784 42500  
FAX: (44) 0 1784 248085  
<http://www.hybaid.co.uk>

**Hybaid Instruments**

8 East Forge Parkway  
Franklin, MA 02028  
(888)4-HYBAID FAX: (508) 541-3041  
(508) 541-6918  
<http://www.hybaid.com>

**Hybridon**

155 Fortune Boulevard  
Milford, MA 01757  
(508) 482-7500 FAX: (508) 482-7510  
<http://www.hybridon.com>

**HyClone Laboratories**

1725 South HyClone Road  
Logan, UT 84321  
(800) HYCLONE  
FAX: (800) 533-9450  
(801) 753-4584 FAX: (801) 750-0809  
<http://www.hyclone.com>

**Hyseq**

670 Almanor Avenue  
Sunnyvale, CA 94086  
(408) 524-8100 FAX: (408) 524-8141  
<http://www.hyseq.com>

**IBA GmbH**

1508 South Grand Blvd.  
St. Louis, MO 63104  
(877) 422-4624 FAX: (888) 531-6813  
<http://www.iba-go.com>

**IBF Biotechnics**

See Sepracor

**IBI (International Biotechnologies)**

See Eastman Kodak  
For technical service (800) 243-2555  
(203) 786-5600

**ICN Biochemicals**

See ICN Biomedicals

**ICN Biomedicals**

3300 Hyland Avenue  
Costa Mesa, CA 92626  
(800) 854-0530 FAX: (800) 334-6999  
(714) 545-0100 FAX: (714) 641-7275  
<http://www.icnbiomed.com>

**ICN Flow and Pharmaceuticals**

See ICN Biomedicals

**ICN Immunobiochemicals**

See ICN Biomedicals

**ICN Radiochemicals**

See ICN Biomedicals

**ICONIX**

100 King Street West, Suite 3825  
Toronto, Ontario  
M5X 1E3 Canada  
(416) 410-2411 FAX: (416) 368-3089  
<http://www.iconix.com>

**ICRT (Imperial Cancer Research Technology)**

Sardinia House  
Sardinia Street  
London WC2A 3NL, UK  
(44) 1712-421136  
FAX: (44) 1718-314991

**Idea Scientific Company**

P.O. Box 13210  
Minneapolis, MN 55414  
(800) 433-2535 FAX: (612) 331-4217  
<http://www.ideascientific.com>

**IEC**

See International Equipment Co.

**IITC**

23924 Victory Boulevard  
Woodland Hills, CA 91367  
(888) 414-4482 (818) 710-1556  
FAX: (818) 992-5185  
<http://www.iitcinc.com>

**IKA Works**

2635 N. Chase Parkway, SE  
Wilmington, NC 28405  
(910) 452-7059 FAX: (910) 452-7693  
<http://www.ika.net>

**Ikegami Electronics**

37 Brook Avenue  
Maywood, NJ 07607  
(201) 368-9171 FAX: (201) 569-1626

**Ikemoto Scientific Technology**

25-11 Hongo  
3-chome, Bunkyo-ku  
Tokyo 101-0025, Japan  
(81) 3-3811-4181  
FAX: (81) 3-3811-1960

**Imagenetics**

See ATC Diagnostics

**Imaging Research**

c/o Brock University  
500 Glenridge Avenue  
St. Catharines, Ontario  
L2S 3A1 Canada  
(905) 688-2040 FAX: (905) 685-5861  
<http://www.imaging.brocku.ca>

**Imclone Systems**

180 Varick Street  
New York, NY 10014  
(212) 645-1405 FAX: (212) 645-2054  
<http://www.imclone.com>

**IMCO Corporation LTD., AB**

P.O. Box 21195  
SE-100 31  
Stockholm, Sweden  
46-8-33-53-09 FAX: 46-8-728-47-76  
<http://www.imcocorp.se>

**Imgenex Corporation**

11175 Flintkote Avenue  
Suite E  
San Diego, CA 92121  
(888) 723-4363 FAX: (858) 642-0937  
(858) 642.0978  
<http://www.imgenex.com>

**IMICO**

Calle Vivero, No. 5-4a Planta  
E-28040, Madrid, Spain  
(34) 1-535-3960  
FAX: (34) 1-535-2780

**Immunex**

51 University Street  
Seattle, WA 98101  
(206) 587-0430 FAX: (206) 587-0606  
<http://www.immunex.com>

**Immunocorp**

1582 W. Deere Avenue  
Suite C  
Irvine, CA 92606  
(800) 446-3063  
<http://www.immunocorp.com>

**Immunotech**

130, av. Delattre de Tassigny  
B.P. 177  
13276 Marseilles Cedex 9  
France  
(33) 491-17-27-00  
FAX: (33) 491-41-43-58  
<http://www.immunotech.fr>

**Imperial Chemical Industries**

Imperial Chemical House  
Millbank, London SW1P 3JF, UK  
(44) 171-834-4444  
FAX: (44)171-834-2042  
<http://www.ici.com>

**Inceltech**

See New Brunswick Scientific

**Incstar**

See DiaSorin

**Incyte**

6519 Dumbarton Circle  
Fremont, CA 94555  
(510) 739-2100 FAX: (510) 739-2200  
<http://www.incyte.com>

**Incyte Pharmaceuticals**

3160 Porter Drive  
Palo Alto, CA 94304  
(877) 746-2983 FAX: (650) 855-0572  
(650) 855-0555  
<http://www.incyte.com>

**Individual Monitoring Systems**

6310 Harford Road  
Baltimore, MD 21214

**Indo Fine Chemical**

P.O. Box 473  
Somerville, NJ 08876  
(888) 463-6346 FAX: (908) 359-1179  
(908) 359-6778  
<http://www.indofinechemical.com>

**IndoPlas**

Unomedical a/s  
Kongevejen 2  
3460 Birkerød, Denmark  
(45) 4816-7000  
FAX: (45) 4816-7045  
<http://www.unomedical.com>

**Industrial Acoustics**

1160 Commerce Avenue  
Bronx, NY 10462  
(718) 931-8000 FAX: (718) 863-1138  
<http://www.industrialacoustics.com>



**Inex Pharmaceuticals**

100-8900 Glenlyon Parkway  
Glenlyon Business Park  
Burnaby, British Columbia  
V5J 5J8 Canada  
(604) 419-3200 FAX: (604) 419-3201  
<http://www.inexpharm.com>

**Ingold, Mettler, Toledo**

261 Ballardvale Street  
Wilmington, MA 01887  
(800) 352-8763 FAX: (978) 658-0020  
(978) 658-7615  
<http://www.mt.com>

**Innogenetics N.V.**

Technologie Park 6  
B-9052 Zwijnaarde  
Belgium  
(32) 9-329-1329  
FAX: (32) 9-245-7623  
<http://www.innogenetics.com>

**Innovative Medical Services**

1725 Gillespie Way  
El Cajon, CA 92020  
(619) 596-8600 FAX: (619) 596-8700  
<http://www.imspure.com>

**Innovative Research**

3025 Harbor Lane N, Suite 300  
Plymouth, MN 55447  
(612) 519-0105 FAX: (612) 519-0239  
<http://www.inres.com>

**Innovative Research of America**

2 N. Tamiami Trail, Suite 404  
Sarasota, FL 34236  
(800) 421-8171 FAX: (800) 643-4345  
(941) 365-1406 FAX: (941) 365-1703  
<http://www.innovsrch.com>

**Inotech Biosystems**

15713 Crabbs Branch Way, #110  
Rockville, MD 20855  
(800) 635-4070 FAX: (301) 670-2859  
(301) 670-2850  
<http://www.inotechintl.com>

**INOVISION**

22699 Old Canal Road  
Yorba Linda, CA 92887  
(714) 998-9600 FAX: (714) 998-9666  
<http://www.inovision.com>

**Instech Laboratories**

5209 Militia Hill Road  
Plymouth Meeting, PA 19462  
(800) 443-4227 FAX: (610) 941-0134  
(610) 941-0132  
<http://www.instechlabs.com>

**Instron**

100 Royall Street  
Canton, MA 02021  
(800) 564-8378 FAX: (781) 575-5725  
(781) 575-5000  
<http://www.instron.com>

**Instrumentarium**

P.O. Box 300  
00031 Instrumentarium  
Helsinki, Finland  
(10) 394-5566  
<http://www.instrumentarium.fi>

**Instruments SA**

Division Jobin Yvon  
16-18 Rue du Canal  
91165 Longjumeau, Cedex, France  
(33)1 6454-1300  
FAX: (33)1 6909-9319  
<http://www.isainc.com>

**Instrutech**

20 Vanderverter Avenue, Suite 101E  
Port Washington, NY 11050  
(516) 883-1300 FAX: (516) 883-1558  
<http://www.instrutech.com>

**Integrated DNA Technologies**

1710 Commercial Park  
Coralville, IA 52241  
(800) 328-2661 FAX: (319) 626-8444  
<http://www.idtdna.com>

**Integrated Genetics**

See Genzyme Genetics

**Integrated Scientific Imaging Systems**

3463 State Street, Suite 431  
Santa Barbara, CA 93105  
(805) 692-2390 FAX: (805) 692-2391  
<http://www.imagingsystems.com>

**Integrated Separation Systems (ISS)**

See OWL Separation Systems

**IntelliGenetics**

See Oxford Molecular Group

**Interactiva BioTechnologie**

Sedanstrasse 10  
D-89077 Ulm, Germany  
(49) 731-93579-290  
FAX: (49) 731-93579-291  
<http://www.interactiva.de>

**Interchim**

213 J.F. Kennedy Avenue  
B.P. 1140  
Montlucon  
03103 France  
(33) 04-70-03-83-55  
FAX: (33) 04-70-03-93-60

**Interfocus**

14/15 Spring Rise  
Falcover Road  
Haverhill, Suffolk CB9 7XU, UK  
(44) 1440 703460  
FAX: (44) 1440 704397  
<http://www.interfocus.ltd.uk>

**Intergen**

2 Manhattanville Road  
Purchase, NY 10577  
(800) 431-4505 FAX: (800) 468-7436  
(914) 694-1700 FAX: (914) 694-1429  
<http://www.intergenco.com>

**Intermountain Scientific**

420 N. Keys Drive  
Kaysville, UT 84037  
(800) 999-2901 FAX: (800) 574-7892  
(801) 547-5047 FAX: (801) 547-5051  
<http://www.bioexpress.com>

**International Biotechnologies (IBI)**

See Eastman Kodak

**International Equipment Co. (IEC)**

See Thermoquest

**International Institute for the**

Advancement of Medicine  
1232 Mid-Valley Drive  
Jessup, PA 18434  
(800) 486-IIAM FAX: (570) 343-6993  
(570) 496-3400  
<http://www.iiam.org>

**International Light**

17 Graf Road  
Newburyport, MA 01950  
(978) 465-5923 FAX: (978) 462-0759

**International Market Supply (I.M.S.)**

Dane Mill  
Broadhurst Lane  
Congleton, Cheshire CW12 1LA, UK  
(44) 1260 275469  
FAX: (44) 1260 276007

**International Marketing Services**

See International Marketing Ventures

**International Marketing Ventures**

6301 Ivy Lane, Suite 408  
Greenbelt, MD 20770  
(800) 373-0096 FAX: (301) 345-0631  
(301) 345-2866  
<http://www.imvlimited.com>

**International Products**

201 Connecticut Drive  
Burlington, NJ 08016  
(609) 386-8770 FAX: (609) 386-8438  
<http://www.mkt.ipcol.com>

**Intracel Corporation**

Bartels Division  
2005 Sammamish Road, Suite 107  
Issaquah, WA 98027  
(800) 542-2281 FAX: (425) 557-1894  
(425) 392-2992  
<http://www.intracel.com>

**Invitrogen**

1600 Faraday Avenue  
Carlsbad, CA 92008  
(800) 955-6288 FAX: (760) 603-7201  
(760) 603-7200  
<http://www.invitrogen.com>

**In Vitro Technologies**

1450 South Rolling Road  
Baltimore, Maryland 21227  
(888) 488-3232 FAX: (443) 836-0340  
(410) 455-1242  
<http://www.invitrotech.com/index.cfm>

**In Vivo Metric**

P.O. Box 249  
Healdsburg, CA 95448  
(707) 433-4819 FAX: (707) 433-2407

**IRORI**

9640 Towne Center Drive  
San Diego, CA 92121  
(858) 546-1300 FAX: (858) 546-3083  
<http://www.ironi.com>

**Irvine Scientific**

2511 Daimler Street  
Santa Ana, CA 92705  
(800) 577-6097 FAX: (949) 261-6522  
(949) 261-7800  
<http://www.irvinesci.com>

**ISC BioExpress**

420 North Kays Drive  
Kaysville, UT 84037  
(800) 999-2901 FAX: (800) 574-7892  
(801) 547-5047  
<http://www.bioexpress.com>

**ISCO**

P.O. Box 5347  
4700 Superior  
Lincoln, NE 68505  
(800) 228-4373 FAX: (402) 464-0318  
(402) 464-0231  
<http://www.isco.com>

**Isis Pharmaceuticals**

Carlsbad Research Center  
2292 Faraday Avenue  
Carlsbad, CA 92008  
(760) 931-9200  
<http://www.isip.com>

**Isolabs**

See Wallac

**ISS**

See Integrated Separation Systems

**J & W Scientific**

See Agilent Technologies

**J.A. Webster**

86 Leominster Road  
Sterling, MA 01564  
(800) 225-7911 FAX: (978) 422-8959  
<http://www.jawebster.com>

**J.T. Baker**

See Mallinckrodt Baker  
222 Red School Lane  
Phillipsburg, NJ 08865  
(800) JTBAKER FAX: (908) 859-6974  
<http://www.jtbaker.com>

**Jackson ImmunoResearch**

Laboratories  
P.O. Box 9  
872 W. Baltimore Pike  
West Grove, PA 19390  
(800) 367-5296 FAX: (610) 869-0171  
(610) 869-4024  
<http://www.jacksonimmuno.com>

**Suppliers**

**The Jackson Laboratory**

600 Maine Street  
Bar Harbor, ME 04059  
(800) 422-6423 FAX: (207) 288-5079  
(207) 288-6000  
<http://www.jax.org>

**Jaece Industries**

908 Niagara Falls Boulevard  
North Tonawanda, NY 14120  
(716) 694-2811 FAX: (716) 694-2811  
<http://www.jaece.com>

**Jandel Scientific**

See SPSS

**Janke & Kunkel**

See Ika Works

**Janssen Life Sciences Products**

See Amersham

**Janssen Pharmaceutica**

1125 Trenton-Harbourton Road  
Titusville, NJ 09560  
(609) 730-2577 FAX: (609) 730-2116  
<http://us.janssen.com>

**Jasco**

8649 Commerce Drive  
Easton, MD 21601  
(800) 333-5272 FAX: (410) 822-7526  
(410) 822-1220  
<http://www.jascoinc.com>

**Jena Bioscience**

Loebstedter Str. 78  
07749 Jena, Germany  
(49) 3641-464920  
FAX: (49) 3641-464991  
<http://www.jenabioscience.com>

**Jencons Scientific**

800 Bursca Drive, Suite 801  
Bridgeville, PA 15017  
(800) 846-9959 FAX: (412) 257-8809  
(412) 257-8861  
<http://www.jencons.co.uk>

**JEOL Instruments**

11 Dearborn Road  
Peabody, MA 01960  
(978) 535-5900 FAX: (978) 536-2205  
<http://www.jeol.com/index.html>

**Jewett**

750 Grant Street  
Buffalo, NY 14213  
(800) 879-7767 FAX: (716) 881-6092  
(716) 881-0030  
<http://www.JewettInc.com>

**John's Scientific**

See VWR Scientific

**John Weiss and Sons**

95 Alston Drive  
Bradwell Abbey  
Milton Keynes, Buckinghamshire  
MK1 4HF UK  
(44) 1908-318017  
FAX: (44) 1908-318708

**Johnson & Johnson Medical**

2500 Arbrook Boulevard East  
Arlington, TX 76004  
(800) 423-4018  
<http://www.jnjmedical.com>

**Johnston Matthey Chemicals**

Orchard Road  
Royston, Hertfordshire SG8 5HE, UK  
(44) 1763-253000  
FAX: (44) 1763-253466  
<http://www.chemicals.matthey.com>

**Jolley Consulting and Research**

683 E. Center Street, Unit H  
Grayslake, IL 60030  
(847) 548-2330 FAX: (847) 548-2984  
<http://www.jolley.com>

**Jordan Scientific**

See Shelton Scientific

**Jorgensen Laboratories**

1450 N. Van Buren Avenue  
Loveland, CO 80538  
(800) 525-5614 FAX: (970) 663-5042  
(970) 669-2500  
<http://www.jorvet.com>

**JRH Biosciences and****JR Scientific**

13804 W. 107th Street  
Lenexa, KS 66215  
(800) 231-3735 FAX: (913) 469-5584  
(913) 469-5580

**Jule Bio Technologies**

25 Science Park, #14, Suite 695  
New Haven, CT 06511  
(800) 648-1772 FAX: (203) 786-5489  
(203) 786-5490  
<http://hometown.aol.com/precastgel/index.htm>

**K.R. Anderson**

2800 Bowers Avenue  
Santa Clara, CA 95051  
(800) 538-8712 FAX: (408) 727-2959  
(408) 727-2800  
<http://www.kranderson.com>

**Kabi Pharmacia Diagnostics**

See Pharmacia Diagnostics

**Kanthal H.P. Reid**

1 Commerce Boulevard  
P.O. Box 352440  
Palm Coast, FL 32135  
(904) 445-2000 FAX: (904) 446-2244  
<http://www.kanthal.com>

**Kapak**

5305 Parkdale Drive  
St. Louis Park, MN 55416  
(800) KAPAK-57  
FAX: (612) 541-0735  
(612) 541-0730  
<http://www.kapak.com>

**Karl Hecht**

Stettener Str. 22-24  
D-97647 Sondheim  
Rhön, Germany  
(49) 9779-8080  
FAX: (49) 9779-80888

**Karl Storz**

Königin-Elisabeth Str. 60  
D-14059 Berlin, Germany  
(49) 30-30 69 09-0  
FAX: (49) 30-30 19 452  
<http://www.karlstorz.de>

**KaVo EWL**

P.O. Box 1320  
D-88293 Leutkirch im Allgäu, Germany  
(49) 7561-86-0  
FAX: (49) 7561-86-371  
<http://www.kavo.com/english/startseite.htm>

**Keithley Instruments**

28775 Aurora Road  
Cleveland, OH 44139  
(800) 552-1115 FAX: (440) 248-6168  
(440) 248-0400  
<http://www.keithley.com>

**Kemin**

2100 Maury Street, Box 70  
Des Moines, IA 50301  
(515) 266-2111 FAX: (515) 266-8354  
<http://www.kemin.com>

**Kemo**

3 Brook Court, Blakeney Road  
Beckenham, Kent BR3 1HG, UK  
(44) 0181 658 3838  
FAX: (44) 0181 658 4084  
<http://www.kemo.com>

**Kendall**

15 Hampshire Street  
Mansfield, MA 02048  
(800) 962-9888 FAX: (800) 724-1324  
<http://www.kendallhq.com>

**Kendro Laboratory Products**

31 Pecks Lane  
Newtown, CT 06470  
(800) 522-SPIN FAX: (203) 270-2166  
(203) 270-2080  
<http://www.kendro.com>

**Kendro Laboratory Products**

P.O. Box 1220  
Am Kalkberg  
D-3360 Osterod, Germany  
(55) 22-316-213  
FAX: (55) 22-316-202  
<http://www.heraeus-instruments.de>

**Kent Laboratories**

23404 NE 8th Street  
Redmond, WA 98053  
(425) 868-6200 FAX: (425) 868-6335  
<http://www.kentlabs.com>

**Kent Scientific**

457 Bantam Road, #16  
Litchfield, CT 06759  
(888) 572-8887 FAX: (860) 567-4201  
(860) 567-5496  
<http://www.kentscientific.com>

**Keuffel & Esser**

See Azon

**Keystone Scientific**

Penn Eagle Industrial Park 320 Rolling  
Ridge Drive  
Bellefonte, PA 16823  
(800) 437-2999 FAX: (814) 353-2305  
(814) 353-2300 Ext 1  
<http://www.keystonescientific.com>

**Kimble/Kontes Biotechnology**

1022 Spruce Street  
P.O. Box 729  
Vineland, NJ 08360  
(888) 546-2531 FAX: (856) 794-9762  
(856) 692-3600  
<http://www.kimble-kontes.com>

**Kinematica AG**

Luzernerstrasse 147a  
CH-6014 Littau-Luzern, Switzerland  
(41) 41 2501257  
FAX: (41) 41 2501460  
<http://www.kinematica.ch>

**Kin-Tek**

504 Laurel Street  
LaMarque, TX 77568  
(800) 326-3627  
FAX: (409) 938-3710  
<http://www.kin-tek.com>

**Kipp & Zonen**

125 Wilbur Place  
Bohemia, NY 11716  
(800) 645-2065 FAX: (516) 589-2068  
(516) 589-2885  
<http://www.kippzonen.thomasregister.com/olc/kippzonen>

**Kirkegaard & Perry Laboratories**

2 Cessna Court  
Gaithersburg, MD 20879  
(800) 638-3167 FAX: (301) 948-0169  
(301) 948-7755  
<http://www.kpl.com>

**Kodak**

See Eastman Kodak

**Kontes Glass**

See Kimble/Kontes Biotechnology

**Kontron Instruments AG**

Postfach CH-8010  
Zurich, Switzerland  
41-1-733-5733 FAX: 41-1-733-5734

**David Kopf Instruments**

P.O. Box 636  
Tujunga, CA 91043  
(818) 352-3274 FAX: (818) 352-3139

**Kraft Apparatus**

See Glas-Col Apparatus

**Suppliers**

**Kramer Scientific Corporation**  
711 Executive Boulevard  
Valley Cottage, NY 10989  
(845) 267-5050 FAX: (845) 267-5550

**Kulite Semiconductor Products**  
1 Willow Tree Road  
Leonia, NJ 07605  
(201) 461-0900 FAX: (201) 461-0990  
<http://www.kulite.com>

**Lab-Line Instruments**  
15th & Bloomingdale Avenues  
Melrose Park, IL 60160  
(800) LAB-LINE FAX: (708) 450-5830  
FAX: (800) 450-4LAB  
<http://www.labline.com>

**Lab Products**  
742 Sussex Avenue  
P.O. Box 639  
Seaford, DE 19973  
(800) 526-0469 FAX: (302) 628-4309  
(302) 628-4300  
<http://www.labproductsinc.com>

**LabRepro**  
101 Witmer Road, Suite 700  
Horsham, PA 19044  
(800) 521-0754 FAX: (215) 442-9202  
<http://www.labrepro.com>

**Lab Safety Supply**  
P.O. Box 1368  
Janesville, WI 53547  
(800) 356-0783 FAX: (800) 543-9910  
(608) 754-7160 FAX: (608) 754-1806  
<http://www.labsafety.com>

**Lab-Tek Products**  
See Nalge Nunc International

**Labconco**  
8811 Prospect Avenue  
Kansas City, MO 64132  
(800) 821-5525 FAX: (816) 363-0130  
(816) 333-8811  
<http://www.labconco.com>

**Labindustries**  
See Barnstead/Thermolyne

**Labnet International**  
P.O. Box 841  
Woodbridge, NJ 07095  
(888) LAB-NET1  
FAX: (732) 417-1750  
(732) 417-0700  
<http://www.nationallabnet.com>

**LABO-MODERNE**  
37 rue Dombasle  
Paris  
75015 France  
(33) 01-45-32-62-54  
FAX: (33) 01-45-32-01-09  
<http://www.laboderne.com/fr>

**Laboratory of Immunoregulation**  
National Institute of Allergy and  
Infectious Diseases/NIH  
9000 Rockville Pike  
Building 10, Room 11B13  
Bethesda, MD 20892  
(301) 496-1124

**Laboratory Supplies**  
29 Jefry Lane  
Hicksville, NY 11801  
(516) 681-7711

**Labscan Limited**  
Stillorgan Industrial Park  
Stillorgan  
Dublin, Ireland  
(353) 1-295-2684  
FAX: (353) 1-295-2685  
<http://www.labscan.ie>

**LabScientific, Inc.**  
114 West Mt. Pleasant Avenue  
Livingston, NJ 07039  
(800) 886-4507 FAX: (973) 992-0827  
(973) 992-0850  
<http://www.labscientific.com>

**Labsystems**  
See Thermo Labsystems

**Labsystems Affinity Sensors**  
Saxon Way, Bar Hill  
Cambridge CB3 8SL, UK  
44 (0) 1954 789976  
FAX: 44 (0) 1954 789417  
<http://www.affinity-sensors.com>

**Labtronics**  
546 Governors Road  
Guelph, Ontario  
N1K 1E3, Canada  
(519) 763-4930 FAX: (519) 836-4431  
<http://www.labtronics.com>

**Labtronix Manufacturing**  
3200 Investment Boulevard  
Hayward, CA 94545  
(510) 786-3200 FAX: (510) 786-3268  
<http://www.labtronix.com>

**Lafayette Instrument**  
3700 Sagamore Parkway North  
P.O. Box 5729  
Lafayette, IN 47903  
(800) 428-7545 FAX: (765) 423-4111  
(765) 423-1505  
<http://www.lafayetteinstrument.com>

**Lambert Instruments**  
Turfweg 4  
9313 TH Leutingewolde  
The Netherlands  
(31) 50-5018461  
FAX: (31) 50-5010034  
<http://www.lambert-instruments.com>

**Lancaster Synthesis**  
P.O. Box 1000  
Windham, NH 03087  
(800) 238-2324 FAX: (603) 889-3326  
(603) 889-3306  
<http://www.lancastersynthesis-us.com>

**Lancer**  
140 State Road 419  
Winter Springs, FL 32708  
(800) 332-1855 FAX: (407) 327-1229  
(407) 327-8488  
<http://www.lancer.com>

**LaVision GmbH**  
Gerhard-Gerdes-Str. 3  
D-37079  
Goettingen, Germany  
(49) 551-50549-0  
FAX: (49) 551-50549-11  
<http://www.lavision.de>

**Lawshe**  
See Advanced Process Supply

**Laxotan**  
20, rue Leon Blum  
26000 Valence, France  
(33) 4-75-41-91-91  
FAX: (33) 4-75-41-91-99  
<http://www.latoxan.com>

**LC Laboratories**  
165 New Boston Street  
Woburn, MA 01801  
(781) 937-0777 FAX: (781) 938-5420  
<http://www.lclaboratories.com>

**LC Packings**  
80 Carolina Street  
San Francisco, CA 94103  
(415) 552-1855 FAX: (415) 552-1859  
<http://www.lcpackings.com>

**LC Services**  
See LC Laboratories

**Leap Technologies**  
P.O. Box 969  
Carboro, NC 27510  
(800) 229-8814 FAX: (919) 929-8952  
(919) 929-8814  
<http://leaptec.com>

**LECO**  
3000 Lakeview Avenue  
St. Joseph, MI 49085  
(800) 292-6141 FAX: (616) 982-8977  
(616) 985-5496  
<http://www.leco.com>

**Lederle Laboratories**  
See Wyeth-Ayerst

**Lee Biomolecular Research  
Laboratories**  
11211 Sorrento Valley Road, Suite M  
San Diego, CA 92121  
(858) 452-7700

**The Lee Company**  
2 Pettipaug Road  
P.O. Box 424  
Westbrook, CT 06498  
(800) LEE-PLUG  
FAX: (860) 399-7058  
(860) 399-6281  
<http://www.theleeco.com>

**Lee Laboratories**  
1475 Athens Highway  
Grayson, GA 30017  
(800) 732-9150 FAX: (770) 979-9570  
(770) 972-4450  
<http://www.leelabs.com>

**Leica**  
111 Deer Lake Road  
Deerfield, IL 60015  
(800) 248-0123 FAX: (847) 405-0147  
(847) 405-0123  
<http://www.leica.com>

**Leica Microsystems**  
Imneueneheimer Feld 518  
D-69120  
Heidelberg, Germany  
(49) 6221-41480  
FAX: (49) 6221-414833  
<http://www.leica-microsystems.com>

**Leinco Technologies**  
359 Consort Drive  
St. Louis, MO 63011  
(314) 230-9477 FAX: (314) 527-5545  
<http://www.leinco.com>

**Leitz U.S.A.**  
See Leica

**LenderKing Metal Products**  
8370 Jumpers Hole Road  
Millersville, MD 21108  
(410) 544-8795 FAX: (410) 544-5069  
<http://www.lenderking.com>

**Letica Scientific Instruments**  
Panlab s.i., c/Loreto 50  
08029 Barcelona, Spain  
(34) 93-419-0709  
FAX: (34) 93-419-7145  
<http://www.panlab-sl.com>

**Leybold-Heraeus Trivac DZA**  
5700 Mellon Road  
Export, PA 15632  
(412) 327-5700

**LI-COR**  
Biotechnology Division  
4308 Progressive Avenue  
Lincoln, NE 68504  
(800) 645-4267 FAX: (402) 467-0819  
(402) 467-0700  
<http://www.licor.com>

**Life Science Laboratories**  
See Adaptive Biosystems

**Life Science Resources**

Two Corporate Center Drive  
Melville, NY 11747  
(800) 747-9530 FAX: (516) 844-5114  
(516) 844-5085  
<http://www.astrocam.com>

**Life Sciences**

2900 72nd Street North  
St. Petersburg, FL 33710  
(800) 237-4323 FAX: (727) 347-2957  
(727) 345-9371  
<http://www.lifesci.com>

**Life Technologies**

9800 Medical Center Drive  
P.O. Box 6482  
Rockville, MD 20849  
(800) 828-6686 FAX: (800) 331-2286  
<http://www.lifetech.com>

**Lifecodes**

550 West Avenue  
Stamford, CT 06902  
(800) 543-3263 FAX: (203) 328-9599  
(203) 328-9500  
<http://www.lifecodes.com>

**Lightnin**

135 Mt. Read Boulevard  
Rochester, NY 14611  
(888) MIX-BEST  
FAX: (716) 527-1742  
(716) 436-5550  
<http://www.lightnin-mixers.com>

**Linear Drives**

Luckyn Lane, Pipp's Hill  
Basildon, Essex SS14 3BW, UK  
(44) 1268-287070  
FAX: (44) 1268-293344  
<http://www.lineardrives.com>

**Linscott's Directory**

4877 Grange Road  
Santa Rosa, CA 95404  
(707) 544-9555 FAX: (415) 389-6025  
<http://www.linscottsdirectory.co.uk>

**Linton Instrumentation**

Unit 11, Forge Business Center  
Upper Rose Lane  
Palgrave, Diss, Norfolk IP22 1AP, UK  
(44) 1-379-651-344  
FAX: (44) 1-379-650-970  
<http://www.lintoninst.co.uk>

**List Biological Laboratories**

501-B Vandell Way  
Campbell, CA 95008  
(800) 726-3213 FAX: (408) 866-6364  
(408) 866-6363  
<http://www.listlabs.com>

**LKB Instruments**

See Amersham Pharmacia Biotech

**Lloyd Laboratories**

604 West Thomas Avenue  
Shenandoah, IA 51601  
(800) 831-0004 FAX: (712) 246-5245  
(712) 246-4000  
<http://www.lloydinc.com>

**Loctite**

1001 Trout Brook Crossing  
Rocky Hill, CT 06067  
(860) 571-5100 FAX: (860) 571-5465  
<http://www.loctite.com>

**Lofstrand Labs**

7961 Cessna Avenue  
Gaithersburg, MD 20879  
(800) 541-0362 FAX: (301) 948-9214  
(301) 330-0111  
<http://www.lofstrand.com>

**Lomir Biochemical**

99 East Main Street  
Malone, NY 12953  
(877) 425-3604 FAX: (518) 483-8195  
(518) 483-7697  
<http://www.lomir.com>

**LSL Biolafitte**

10 rue de Temara  
7810C St.-Germain-en-Laye, France  
(33) 1-3061-5260  
FAX: (33) 1-3061-5234

**Ludl Electronic Products**

171 Brady Avenue  
Hawthorne, NY 10532  
(888) 769-6111 FAX: (914) 769-4759  
(914) 769-6111  
<http://www.ludl.com>

**Lumigen**

24485 W. Ten Mile Road  
Southfield, MI 48034  
(248) 351-5600 FAX: (248) 351-0518  
<http://www.lumigen.com>

**Luminex**

12212 Technology Boulevard  
Austin, TX 78727  
(888) 219-8020 FAX: (512) 258-4173  
(512) 219-8020  
<http://www.luminexcorp.com>

**LYNX Therapeutics**

25861 Industrial Boulevard  
Hayward, CA 94545 (510) 670-9300  
FAX: (510) 670-9302  
<http://www.lynxgen.com>

**Lyphomed**

3 Parkway North  
Deerfield, IL 60015  
(847) 317-8100 FAX: (847) 317-8600

**M.E.D. Associates**

See Med Associates

**Mabtech**

Mariemont Executive Building  
Suite 112  
3814 West Street  
Mariemont, Ohio 45227  
(866) ELISPOT FAX: (513) 821-7353  
(513) 821-4500  
<http://www.mabtech.com>

**Macherey-Nagel**

6 South Third Street, #402  
Easton, PA 18042  
(610) 559-9848 FAX: (610) 559-9878  
<http://www.macherey-nagel.com>

**Macherey-Nagel**

Valencienner Strasse 11  
P.O. Box 101352  
D-52313 Dueren, Germany  
(49) 2421-969141  
FAX: (49) 2421-969199  
<http://www.macherey-nagel.ch>

**Mac-Mod Analytical**

127 Commons Court  
Chadds Ford, PA 19317  
800-441-7508 FAX: (610) 358-5993  
(610) 358-9696  
<http://www.mac-mod.com>

**Mallinckrodt Baker**

222 Red School Lane  
Phillipsburg, NJ 08865  
(800) 582-2537 FAX: (908) 859-6974  
(908) 859-2151  
<http://www.mallbaker.com>

**Mallinckrodt Chemicals**

16305 Swingley Ridge Drive  
Chesterfield, MD 63017  
(314) 530-2172 FAX: (314) 530-2563  
<http://www.mallchem.com>

**Malven Instruments**

Enigma Business Park  
Groveswood Road  
Malven, Worchestershire WR 141 XZ,  
UK

**Marinus**

1500 Pier C Street  
Long Beach, CA 90813  
(562) 435-6522 FAX: (562) 495-3120

**Markson Science**

c/o Whatman Labs Sales  
P.O. Box 1359  
Hillsboro, OR 97123  
(800) 942-8626 FAX: (503) 640-9716  
(503) 648-0762

**Marsh Biomedical Products**

565 Blossom Road  
Rochester, NY 14610  
(800) 445-2812 FAX: (716) 654-4810  
(716) 654-4800  
<http://www.biomar.com>

**Marshall Farms USA**

5800 Lake Bluff Road  
North Rose, NY 14516  
(315) 587-2295  
e-mail:info@marfarms.com

**Martek**

6480 Dobbin Road  
Columbia, MD 21045  
(410) 740-0081 FAX: (410) 740-2985  
<http://www.martekbio.com>

**Martin Supply**

Distributor of Gerber Scientific  
2740 Loch Raven Road  
Baltimore, MD 21218  
(800) 282-5440 FAX: (410) 366-0134  
(410) 366-1696

**Mast Immunosystems**

630 Clyde Court  
Mountain View, CA 94043  
(800) 233-MAST  
FAX: (650) 969-2745  
(650) 961-5501  
<http://www.mastallergy.com>

**Matheson Gas Products**

P.O. Box 624  
959 Route 46 East  
Parsippany, NJ 07054  
(800) 416-2505 FAX: (973) 257-9393  
(973) 257-1100  
<http://www.mathesongas.com>

**Mathsoft**

1700 Westlake Avenue N., Suite 500  
Seattle, WA 98109  
(800) 569-0123 FAX: (206) 283-8691  
(206) 283-8802  
<http://www.mathsoft.com>

**Matreya**

500 Tressler Street  
Pleasant Gap, PA 16823  
(814) 359-5060 FAX: (814) 359-5062  
<http://www.matreya.com>

**Matrigel**

See Becton Dickinson Labware

**Matrix Sciences**

225 Franklin Street  
26th Floor  
Boston, MA 02110  
(800) 716-6702 FAX: (800) 716-6704  
<http://www.matrixscience.com>

**Matrix Technologies**

22 Friars Drive  
Hudson, NH 03051  
(800) 345-0206 FAX: (603) 595-0106  
(603) 595-0505  
<http://www.matrixtechcorp.com>

**MatTek Corp.**

200 Homer Avenue  
Ashland, Massachusetts 01721  
(508) 881-6771 FAX: (508) 879-1532  
<http://www.mattek.com>

**Suppliers**

**Maxim Medical**  
89 Oxford Road  
Oxford OX2 9PD, UK  
44 (0)1865-865943  
FAX: 44 (0)1865-865291  
<http://www.maximmed.com>

**Mayo Clinic**  
Section on Engineering  
Project #ALA-1, 1982  
200 1st Street SW  
Rochester, MN 55905  
(507) 284-2511 FAX: (507) 284-5988

**McGaw**  
See B. Braun-McGaw

**McMaster-Carr**  
600 County Line Road  
Elmhurst, IL 60126  
(630) 833-0300 FAX: (630) 834-9427  
<http://www.mcmaster.com>

**McNeil Pharmaceutical**  
See Ortho McNeil Pharmaceutical

**MCNC**  
3021 Cornwallis Road  
P.O. Box 12889  
Research Triangle Park, NC 27709  
(919) 248-1800 FAX: (919) 248-1455  
<http://www.mcnc.org>

**MD Industries**  
5 Revere Drive, Suite 415  
Northbrook, IL 60062  
(800) 421-8370 FAX: (847) 498-2627  
(708) 339-6000  
<http://www.mdindustries.com>

**MDS Nordion**  
447 March Road  
P.O. Box 13500  
Kanata, Ontario  
K2K 1X8, Canada  
(800) 465-3666 FAX: (613) 592-6937  
(613) 592-2790  
<http://www.mds.nordion.com>

**MDS Sciex**  
71 Four Valley Drive  
Concord, Ontario  
Canada L4K 4V8  
(905) 660-9005 FAX: (905) 660-2600  
<http://www.sciex.com>

**Mead Johnson**  
See Bristol-Meyers Squibb

**Med Associates**  
P.O. Box 319  
St. Albans, VT 05478  
(802) 527-2343 FAX: (802) 527-5095  
<http://www.med-associates.com>

**Medecell**  
239 Liverpool Road  
London N1 1LX, UK  
(44) 20-7607-2295  
FAX: (44) 20-7700-4156  
<http://www.medicell.co.uk>

**Media Cybernetics**  
8484 Georgia Avenue, Suite 200  
Silver Spring, MD 20910  
(301) 495-3305 FAX: (301) 495-5964  
<http://www.mediacy.com>

**Mediatech**  
13884 Park Center Road  
Herndon, VA 20171  
(800) cellgro  
(703) 471-5955  
<http://www.cellgro.com>

**Medical Systems**  
See Harvard Apparatus

**Medifor**  
647 Washington Street  
Port Townsend, WA 98368  
(800) 366-3710 FAX: (360) 385-4402  
(360) 385-0722  
<http://www.medifor.com>

**MedImmune**  
35 W. Watkins Mill Road  
Gaithersburg, MD 20878  
(301) 417-0770 FAX: (301) 527-4207  
<http://www.medimmune.com>

**MedProbe AS**  
P.O. Box 2640  
St. Hanshaugen  
N-0131 Oslo, Norway  
(47) 222 00137 FAX: (47) 222 00189  
<http://www.medprobe.com>

**Megazyme**  
Bray Business Park  
Bray, County Wicklow  
Ireland  
(353) 1-286-1220  
FAX: (353) 1-286-1264  
<http://www.megazyme.com>

**Melles Griot**  
4601 Nautilus Court South  
Boulder, CO 80301  
(800) 326-4363 FAX: (303) 581-0960  
(303) 581-0337  
<http://www.mellesgriot.com>

**Menzel-Glaser**  
Postfach 3157  
D-38021 Braunschweig, Germany  
(49) 531 590080  
FAX: (49) 531 509799

**E. Merck**  
Frankfurterstrasse 250  
D-64293 Darmstadt 1, Germany  
(49) 6151-720

**Merck**  
See EM Science

**Merck & Company**  
Merck National Service Center  
P.O. Box 4  
West Point, PA 19486  
(800) NSC-MERCK  
(215) 652-5000  
<http://www.merck.com>

**Merck Research Laboratories**  
See Merck & Company

**Merck Sharpe Human Health Division**  
300 Franklin Square Drive  
Somerset, NJ 08873  
(800) 637-2579 FAX: (732) 805-3960  
(732) 805-0300

**Merial Limited**  
115 Transtech Drive  
Athens, GA 30601  
(800) Merial-1  
FAX: (706) 548-0608  
(706) 548-9292  
<http://www.merial.com>

**Meridian Instruments**  
P.O. Box 1204  
Kent, WA 98035  
(253) 854-9914 FAX: (253) 854-9902  
<http://www.minstrument.com>

**Meta Systems Group**  
32 Hammond Road  
Belmont, MA 02178  
(617) 489-9950 FAX: (617) 489-9952

**Metachem Technologies**  
3547 Voyager Street, Bldg. 102  
Torrance, CA 90503  
(310) 793-2300 FAX: (310) 793-2304  
<http://www.metachem.com>

**Metallhantering**  
Box 47172  
100-74 Stockholm, Sweden  
(46) 8-726-9696

**MethylGene**  
7220 Frederick-Banting, Suite 200  
Montreal, Quebec  
H4S 2A1, Canada  
<http://www.methylgene.com>

**Metro Scientific**  
475 Main Street, Suite 2A  
Farmingdale, NY 11735  
(800) 788-6247 FAX: (516) 293-8549  
(516) 293-9656

**Metrowerks**  
980 Metric Boulevard  
Austin, TX 78758  
(800) 377-5416  
(512) 997-4700  
<http://www.metrowerks.com>

**Mettler Instruments**  
Mettler-Toledo  
1900 Polaris Parkway  
Columbus, OH 43240  
(800) METTLER  
FAX: (614) 438-4900  
<http://www.mt.com>

**Miami Serpentarium Labs**  
34879 Washington Loop Road  
Punta Gorda, FL 33982  
(800) 248-5050 FAX: (813) 639-1811  
(813) 639-8888  
<http://www.miamiserpentarium.com>

**Michrom BioResources**  
1945 Industrial Drive  
Auburn, CA 95603  
(530) 888-6498 FAX: (530) 888-8295  
<http://www.michrom.com>

**Mickle Laboratory Engineering**  
Gomshall, Surrey, UK  
(44) 1483-202178

**Micra Scientific**  
A division of Eichrom Industries  
8205 S. Cass Ave, Suite 111  
Darien, IL 60561  
(800) 283-4752 FAX: (630) 963-1928  
(630) 963-0320  
<http://www.micrasci.com>

**MicroBrightField**  
74 Hegman Avenue  
Colchester, VT 05446  
(802) 655-9360 FAX: (802) 655-5245  
<http://www.microbrightfield.com>

**Micro Essential Laboratory**  
4224 Avenue H  
Brooklyn, NY 11210  
(718) 338-3618 FAX: (718) 692-4491

**Micro Filtration Systems**  
7-3-Chome, Honcho  
Nihonbashi, Tokyo, Japan  
(81) 3-270-3141

**Micromath**  
1710 South Brentwood Blvd  
Saint Louis, MO 63144  
(800) 942-6284 FAX: (800) 942-6284  
<http://www.micromath.com/>

**Micro-Metrics**  
P.O. Box 13804  
Atlanta, GA 30324  
(770) 986-6015 FAX: (770) 986-9510  
<http://www.micro-metrics.com>

**Micro-Tech Scientific**  
140 South Wolfe Road  
Sunnyvale, CA 94086  
(408) 730-8324 FAX: (408) 730-3566  
<http://www.microclc.com>

**Microbix Biosystems**  
341 Bering Avenue  
Toronto, Ontario  
M8Z 3A8 Canada  
(800)-794-6694 FAX: (416)-234-1626  
(416)-234-1624  
<http://www.microbix.com>

**MicroCal**

22 Industrial Drive East  
Northampton, MA 01060  
(800) 633-3115 FAX: (413) 586-0149  
(413) 586-7720  
<http://www.microcalorimetry.com>

**Microfluidics**

30 Ossipee Road  
P.O. Box 9101  
Newton, MA 02164  
(800) 370-5452 FAX: (617) 965-1213  
(617) 969-5452  
<http://www.microfluidicscorp.com>

**Microgon**

See Spectrum Laboratories

**Microlase Optical Systems**

West of Scotland Science Park  
Kelvin Campus, Maryhill Road  
Glasgow G20 0SP, UK  
(44) 141-948-1000  
FAX: (44) 141-946-6311  
<http://www.microlase.co.uk>

**Micron Instruments**

4509 Runway Street  
Simi Valley, CA 93063  
(800) 638-3770 FAX: (805) 522-4982  
(805) 552-4676  
<http://www.microninstruments.com>

**Micron Separations**

See MSI

**Micro Photonics**

4949 Liberty Lane, Suite 170  
P.O. Box 3129  
Allentown, PA 18106  
(610) 366-7103 FAX: (610) 366-7105  
<http://www.microphotonics.com>

**MicroTech**

1420 Conchester Highway  
Boothwyn, PA 19061  
(610) 459-3514

**Midland Certified Reagent Company**

3112-A West Cuthbert Avenue  
Midland, TX 79701  
(800) 247-8766 FAX: (800) 359-5789  
(915) 694-7950 FAX: (915) 694-2387  
<http://www.mcrc.com>

**Midwest Research Institute**

425 Volker Boulevard  
Kansas City, Missouri 64110  
(816) 753-7600  
[www.mriresearch.org](http://www.mriresearch.org)

**Midwest Scientific**

280 Vance Road  
Valley Park, MO 63088  
(800) 227-9997 FAX: (636) 225-9998  
(636) 225-9997  
<http://www.midsci.com>

**Miles**

See Bayer

**Miles Laboratories**

See Serological

**Miles Scientific**

See Nunc

**Millar Instruments**

P.O. Box 230227  
6001-A Gulf Freeway  
Houston, TX 77023  
(713) 923-9171 FAX: (713) 923-7757  
<http://www.millarinstruments.com>

**MilliGen/Biosearch**

See Millipore

**Millipore**

80 Ashbury Road  
P.O. Box 9125  
Bedford, MA 01730  
(800) 645-5476 FAX: (781) 533-3110  
(781) 533-6000  
<http://www.millipore.com>

**Miltenyi Biotec**

251 Auburn Ravine Road, Suite 208  
Auburn, CA 95603  
(800) 367-6227 FAX: (530) 888-8925  
(530) 888-8871  
<http://www.miltenyibiotec.com>

**Miltex**

6 Ohio Drive  
Lake Success, NY 11042  
(800) 645-8000 FAX: (516) 775-7185  
(516) 349-0001

**Milton Roy**

See Spectronic Instruments

**Minerva Biolabs GmbH**

Kopenicker Strasse 325  
D-12555 Berlin  
Germany  
49 (0)30 6576 2830  
FAX: 49 (0)30 6576 2831  
<http://www.minerva-biolabs.com>

**Mini-Instruments**

15 Burnham Business Park  
Springfield Road  
Burnham-on-Crouch, Essex CM0 8TE,  
UK  
(44) 1621-783282  
FAX: (44) 1621-783132  
<http://www.mini-instruments.co.uk>

**Mini Mitter**

P.O. Box 3386  
Sunriver, OR 97707  
(800) 685-2999 FAX: (541) 593-5604  
(541) 593-8639  
<http://www.minimitter.com>

**Mirus Corporation**

505 S. Rosa Road  
Suite 104  
Madison, WI 53719  
(608) 441-2852 FAX: (608) 441-2849  
<http://www.genetransfer.com>

**Misonix**

1938 New Highway  
Farmingdale, NY 11735  
(800) 645-9846 FAX: (516) 694-9412  
<http://www.misonix.com>

**Mitutoyo (MTI)**

See Dolla Eastern

**MJ Research**

Waltham, MA 02451  
(800) PELTIER FAX: (617) 923-8080  
(617) 923-8000  
<http://www.mjr.com>

**Modular Instruments**

228 West Gay Street  
Westchester, PA 19380  
(610) 738-1420 FAX: (610) 738-1421  
<http://www.mi2.com>

**Molecular Biology Insights**

8685 US Highway 24  
Cascade, CO 80809-1333  
(800) 747-4362 FAX: (719) 684-7989  
(719) 684-7988  
<http://www.oligo.net>

**Molecular Biosystems**

10030 Barnes Canyon Road  
San Diego, CA 92121  
(858) 452-0681 FAX: (858) 452-6187  
<http://www.mobi.com>

**Molecular Devices**

1312 Crossman Avenue  
Sunnyvale, CA 94089  
(800) 635-5577 FAX: (408) 747-3602  
(408) 747-1700  
<http://www.moldev.com>

**Molecular Designs**

1400 Catalina Street  
San Leandro, CA 94577  
(510) 895-1313 FAX: (510) 614-3608

**Molecular Dynamics**

928 East Arques Avenue  
Sunnyvale, CA 94086  
(800) 333-5703 FAX: (408) 773-1493  
(408) 773-1222  
<http://www.apbiotech.com>

**Molecular Probes**

4849 Pitchford Avenue  
Eugene, OR 97402  
(800) 438-2209 FAX: (800) 438-0228  
(541) 465-8300 FAX: (541) 344-6504  
<http://www.probes.com>

**Molecular Research Center**

5645 Montgomery Road  
Cincinnati, OH 45212  
(800) 462-9868 FAX: (513) 841-0080  
(513) 841-0900  
<http://www.mrcgene.com>

**Molecular Simulations**

9685 Scranton Road  
San Diego, CA 92121  
(800) 756-4674 FAX: (858) 458-0136  
(858) 458-9990  
<http://www.msi.com>

**Monoject Disposable Syringes**

**& Needles/Syrvet**  
16200 Walnut Street  
Waukee, IA 50263  
(800) 727-5203 FAX: (515) 987-5553  
(515) 987-5554  
<http://www.syrvet.com>

**Monsanto Chemical**

800 North Lindbergh Boulevard  
St. Louis, MO 63167  
(314) 694-1000 FAX: (314) 694-7625  
<http://www.monsanto.com>

**Moravek Biochemicals**

577 Mercury Lane  
Brea, CA 92821  
(800) 447-0100 FAX: (714) 990-1824  
(714) 990-2018  
<http://www.moravek.com>

**Moss**

P.O. Box 189  
Pasadena, MD 21122  
(800) 932-6677 FAX: (410) 768-3971  
(410) 768-3442  
<http://www.mosssubstrates.com>

**Motion Analysis**

3617 Westwind Boulevard  
Santa Rosa, CA 95403  
(707) 579-6500 FAX: (707) 526-0629  
<http://www.motionanalysis.com>

**Mott**

Farmington Industrial Park  
84 Spring Lane  
Farmington, CT 06032  
(860) 747-6333 FAX: (860) 747-6739  
<http://www.mottcorp.com>

**MSI (Micron Separations)**

See Osmonics

**Multi Channel Systems**

Markwiesenstrasse 55  
72770 Reutlingen, Germany  
(49) 7121-503010  
FAX: (49) 7121-503011  
<http://www.multichannelsystems.com>

**Multiple Peptide Systems**

3550 General Atomics Court  
San Diego, CA 92121  
(800) 338-4965 FAX: (800) 654-5592  
(858) 455-3710 FAX: (858) 455-3713  
<http://www.mps-sd.com>

**Murex Diagnostics**

3075 Northwoods Circle  
Norcross, GA 30071  
(707) 662-0660 FAX: (770) 447-4989

**MWG-Biotech**

Anzinger Str. 7  
D-85560 Ebersberg, Germany  
(49) 8092-82890  
FAX: (49) 8092-21084  
<http://www.mwg-biotech.com>

**Myriad Industries**

3454 E Street  
San Diego, CA 92102  
(800) 999-6777 FAX: (619) 232-4819  
(619) 232-6700  
<http://www.myriadindustries.com>

**Nacalai Tesque**

Nijo Karasuma, Nakagyo-ku  
Kyoto 604, Japan  
81-75-251-1723  
FAX: 81-75-251-1762  
<http://www.nacalai.co.jp>

**Nalge Nunc International**

Subsidiary of Sybron International  
75 Panorama Creek Drive  
P.O. Box 20365  
Rochester, NY 14602  
(800) 625-4327 FAX: (716) 586-8987  
(716) 264-9346  
<http://www.nalgenunc.com>

**Nanogen**

10398 Pacific Center Court  
San Diego, CA 92121  
(858) 410-4600 FAX: (858) 410-4848  
<http://www.nanogen.com>

**Nanoprobes**

95 Horse Block Road  
Yaphank, NY 11980  
(877) 447-6266 FAX: (631) 205-9493  
(631) 205-9490  
<http://www.nanoprobes.com>

**Narishige USA**

1710 Hempstead Turnpike  
East Meadow, NY 11554  
(800) 445-7914 FAX: (516) 794-0066  
(516) 794-8000  
<http://www.narishige.co.jp>

**National Bag Company**

2233 Old Mill Road  
Hudson, OH 44236  
(800) 247-6000 FAX: (330) 425-9800  
(330) 425-2600  
<http://www.nationalbag.com>

**National Band and Tag**

Department X 35, Box 72430  
Newport, KY 41032  
(606) 261-2035 FAX: (800) 261-8247  
<https://www.nationalband.com>

**National Biosciences**

See Molecular Biology Insights

**National Diagnostics**

305 Patton Drive  
Atlanta, GA 30336  
(800) 526-3867 FAX: (404) 699-2077  
(404) 699-2121  
<http://www.nationaldiagnostics.com>

**National Institute of Standards and Technology**

100 Bureau Drive  
Gaithersburg, MD 20899  
(301) 975-NIST FAX: (301) 926-1630  
<http://www.nist.gov>

**National Instruments**

11500 North Mopac Expressway  
Austin, TX 78759  
(512) 794-0100 FAX: (512) 683-8411  
<http://www.ni.com>

**National Labnet**

See Labnet International

**National Scientific Instruments**

975 Progress Circle  
Lawrenceville, GA 300243  
(800) 332-3331 FAX: (404) 339-7173  
<http://www.nationalscientific.com>

**National Scientific Supply**

1111 Francisco Boulevard East  
San Rafael, CA 94901  
(800) 525-1779 FAX: (415) 459-2954  
(415) 459-6070  
<http://www.nat-sci.com>

**Naz-Dar-KC Chicago**

Nazdar  
1087 N. North Branch Street  
Chicago, IL 60622  
(800) 736-7636 FAX: (312) 943-8215  
(312) 943-8338  
<http://www.nazdar.com>

**NB Labs**

1918 Avenue A  
Denison, TX 75021  
(903) 465-2694 FAX: (903) 463-5905  
<http://www.nblabslarry.com>

**NCTsoft**

<http://www.nctsoft.com>

**NEB**

See New England Biolabs

**NEN Life Science Products**

549 Albany Street  
Boston, MA 02118  
(800) 551-2121 FAX: (617) 451-8185  
(617) 350-9075  
<http://www.nen.com>

**NEN Research Products, Dupont (UK)**

Diagnostics and Biotechnology  
Systems  
Wedgewood Way  
Stevenage, Hertfordshire SG1 4QN,  
UK  
44-1438-734831  
44-1438-734000  
FAX: 44-1438-734836  
<http://www.dupont.com>

**Neogen**

628 Winchester Road  
Lexington, KY 40505  
(800) 477-8201 FAX: (606) 255-5532  
(606) 254-1221  
<http://www.neogen.com>

**Neosystems**

380, 11012 Macleod Trail South  
Calgary, Alberta  
T2J 6A5 Canada  
(403) 225-9022 FAX: (403) 225-9025  
<http://www.neosystems.com>

**Neuralynx**

2434 North Pantano Road  
Tucson, AZ 85715  
(520) 722-8144 FAX: (520) 722-8163  
<http://www.neuralynx.com>

**Neuro Probe**

16008 Industrial Drive  
Gaithersburg, MD 20877  
(301) 417-0014 FAX: (301) 977-5711  
<http://www.neuroprobe.com>

**Neurocrine Biosciences**

10555 Science Center Drive  
San Diego, CA 92121  
(619) 658-7600 FAX: (619) 658-7602  
<http://www.neurocrine.com>

**Nevtek**

HCR03, Box 99  
Burnsville, VA 24487  
(540) 925-2322 FAX: (540) 925-2323  
<http://www.nevtek.com>

**New Brunswick Scientific**

44 Talmadge Road  
Edison, NJ 08818  
(800) 631-5417 FAX: (732) 287-4222  
(732) 287-1200  
<http://www.nbsc.com>

**New England Biolabs (NEB)**

32 Tozer Road  
Beverly, MA 01915  
(800) 632-5227 FAX: (800) 632-7440  
<http://www.neb.com>

**New England Nuclear (NEN)**

See NEN Life Science Products

**New MBR**

Gubelstrasse 48  
CH8050 Zurich, Switzerland  
(41) 1-313-0703

**Newark Electronics**

4801 N. Ravenswood Avenue  
Chicago, IL 60640  
(800) 4-NEWARK  
FAX: (773) 907-5339  
(773) 784-5100  
<http://www.newark.com>

**Newell Rubbermaid**

29 E. Stephenson Street  
Freeport, IL 61032  
(815) 235-4171 FAX: (815) 233-8060  
<http://www.newellco.com>

**Newport Biosystems**

1860 Tractor Street  
Red Bluff, CA 96080  
(530) 529-2448 FAX: (530) 529-2648

**Newport**

1791 Deere Avenue  
Irvine, CA 92606  
(800) 222-6440 FAX: (949) 253-1800  
(949) 253-1462  
<http://www.newport.com>

**Nexin Research B.V.**

P.O. Box 16  
4740 AA Hoeven, The Netherlands  
(31) 165-503172  
FAX: (31) 165-502291

**NIAID**

See Bio-Tech Research Laboratories

**Nichiryo**

230 Route 206  
Building 2-2C  
Flanders, NJ 07836  
(877) 548-6667 FAX: (973) 927-0099  
(973) 927-4001  
<http://www.nichiryo.com>

**Nichols Institute Diagnostics**

33051 Calle Aviador  
San Juan Capistrano, CA 92675  
(800) 286-4NID FAX: (949) 240-5273  
(949) 728-4610  
<http://www.nicholsdiag.com>

**Nichols Scientific Instruments**

3334 Brown Station Road  
Columbia, MO 65202  
(573) 474-5522 FAX: (603) 215-7274  
<http://home.beseen.com>  
[technology/insi\\_technology](http://technology/insi_technology)

**Nicolet Biomedical Instruments**

5225 Verona Road, Building 2  
Madison, WI 53711  
(800) 356-0007 FAX: (608) 441-2002  
(608) 273-5000  
<http://nicoletbiomedical.com>

**N.I.G.M.S. (National Institute of General Medical Sciences)**

See Coriell Institute for Medical Research

**Nikon**

Science and Technologies Group  
1300 Walt Whitman Road  
Melville, NY 11747  
(516) 547-8500 FAX: (516) 547-4045  
<http://www.nikonusa.com>

**Nippon Gene**

1-29, Ton-ya-machi  
Toyama 930, Japan  
(81) 764-51-6548  
FAX: (81) 764-51-6547

**Suppliers**

**Noldus Information Technology**

751 Miller Drive  
Suite E-5  
Leesburg, VA 20175  
(800) 355-9541 FAX: (703) 771-0441  
(703) 771-0440  
<http://www.noldus.com>

**Nonlinear Dynamics Ltd.**

Cuthbert House  
All Saints, Newcastle upon Tyne  
NE1 2RT, UK  
44 (0) 191-230-2121  
<http://www.nonlinear.com>

**Nonlinear USA Inc.**

4819 Emperor Blvd  
Suite 400  
Durham, NC 27703  
(919) 313-4556  
<http://www.nonlinear.com>

**Nordion International**

See MDS Nordion

**North American Biologicals (NABI)**

16500 NW 15th Avenue  
Miami, FL 33169  
(800) 327-7106 (305) 625-5305  
<http://www.nabi.com>

**North American Reiss**

See Reiss

**Northwestern Bottle**

24 Walpole Park South  
Walpole, MA 02081  
(508) 668-8600 FAX: (508) 668-7790

**NOVA Biomedical**

Nova Biomedical 200  
Prospect Street Waltham, MA 02454  
(800) 822-0911 FAX: (781) 894-5915  
<http://www.novabiomedical.com>

**Novagen**

601 Science Drive  
Madison, WI 53711  
(800) 526-7319 FAX: (608) 238-1388  
(608) 238-6110  
<http://www.novagen.com>

**Novartis**

59 Route 10  
East Hanover, NJ 07936  
(800)526-0175 FAX: (973) 781-6356  
<http://www.novartis.com>

**Novartis Biotechnology**

3054 Cornwallis Road  
Research Triangle Park, NC 27709  
(888) 462-7288 FAX: (919) 541-8585  
<http://www.novartis.com>

**Nova Sina AG**

Subsidiary of Airflow Lufttechnik GmbH  
Kleine Heeg 21  
52259 Rheinbach, Germany  
(49) 02226 920-0  
FAX: (49) 02226 9205-11

**Novex/Invitrogen**

1600 Faraday  
Carlsbad, CA 92008  
(800) 955-6288 FAX: (760) 603-7201  
<http://www.novex.com>

**Novo Nordisk Biochem**

77 Perry Chapel Church Road  
Franklington, NC 27525  
(800) 879-6686 FAX: (919) 494-3450  
(919) 494-3000  
<http://www.novo.dk>

**Novo Nordisk BioLabs**

See Novo Nordisk Biochem

**Novocastra Labs**

Balliol Business Park West  
Benton Lane  
Newcastle-upon-Tyne  
Tyne and Wear NE12 8EW, UK  
(44) 191-215-0567  
FAX: (44) 191-215-1152  
<http://www.novocastra.co.uk>

**Novus Biologicals**

P.O. Box 802  
Littleton, CO 80160  
(888) 506-6887 FAX: (303) 730-1966  
<http://www.novus-biologicals.com/main.html>

**NPI Electronic**

Hauptstrasse 96  
D-71732 Tamm, Germany  
(49) 7141-601534  
FAX: (49) 7141-601266  
<http://www.npielectronic.com>

**NSG Precision Cells**

195G Central Avenue  
Farmingdale, NY 11735  
(516) 249-7474 FAX: (516) 249-8575  
<http://www.nsgpci.com>

**Nu Chek Prep**

109 West Main  
P.O. Box 295  
Elysian, MN 56028  
(800) 521-7728 FAX: (507) 267-4790  
(507) 267-4689

**Nuclepore**

See Costar

**Numonics**

101 Commerce Drive  
Montgomeryville, PA 18936  
(800) 523-6716 FAX: (215) 361-0167  
(215) 362-2766  
<http://www.interactivewhiteboards.com>

**NYCOMED AS Pharma**

c/o Accurate Chemical & Scientific  
300 Shames Drive  
Westbury, NY 11590  
(800) 645-6524 FAX: (516) 997-4948  
(516) 333-2221  
<http://www.accuratechemical.com>

**Nycomed Amersham**

Health Care Division  
101 Carnegie Center  
Princeton, NJ 08540  
(800) 832-4633 FAX: (800) 807-2382  
(609) 514-6000  
<http://www.nycomed-amersham.com>

**Nyegaard**

Herserudsvagen 5254  
S-122 06 Lidingo, Sweden  
(46) 8-765-2930

**Ohmeda Catheter Products**

See Datex-Ohmeda

**Ohwa Tsusbo**

Hiby Dai Building  
1-2-2 Uchi Saiwai-cho  
Chiyoda-ku  
Tokyo 100, Japan  
03-3591-7348 FAX: 03-3501-9001

**Oligos Etc.**

9775 S.W. Commerce Circle, C-6  
Wilsonville, OR 97070  
(800) 888-2358  
FAX: (503) 682-1635  
(503) 682-1814  
<http://www.oligosetc.com>

**Olis Instruments**

130 Conway Drive  
Bogart, GA 30622  
(706) 353-6547 (800) 852-3504  
<http://www.olisweb.com>

**Olympus America**

2 Corporate Center Drive  
Melville, NY 11747  
(800) 645-8160 FAX: (516) 844-5959  
(516) 844-5000  
<http://www.olympusamerica.com>

**Omega Engineering**

One Omega Drive  
P.O. Box 4047  
Stamford, CT 06907  
(800) 848-4286 FAX: (203) 359-7700  
(203) 359-1660  
<http://www.omega.com>

**Omega Optical**

3 Grove Street  
P.O. Box 573  
Brattleboro, VT 05302  
(802) 254-2690 FAX: (802) 254-3937  
<http://www.omegafilters.com>

**Omnetics Connector Corporation**

7260 Commerce Circle  
East Minneapolis, MN 55432  
(800) 343-0025 (763) 572-0656  
FAX: (763) 572-3925  
<http://www.omnetics.com/main.htm>

**Omni International**

6530 Commerce Court  
Warrenton, VA 20187  
(800) 776-4431 FAX: (540) 347-5352  
(540) 347-5331  
<http://www.omni-inc.com>

**Omnion**

2010 Energy Drive  
P.O. Box 879  
East Troy, WI 53120  
(262) 642-7200 FAX: (262) 642-7760  
<http://www.omnion.com>

**Omnitech Electronics**

See AccuScan Instruments

**Oncogene Research Products**

P.O. Box Box 12087  
La Jolla, CA 92039-2087  
(800) 662-2616 FAX: (800) 766-0999  
<http://www.apoptosis.com>

**Oncogene Science**

See OSI Pharmaceuticals

**Oncor**

See InterGen

**Online Instruments**

130 Conway Drive, Suites A & B  
Bogart, GA 30622  
(800) 852-3504 (706) 353-1972  
(706) 353-6547  
<http://www.olisweb.com>

**Operon Technologies**

1000 Atlantic Avenue  
Alameda, CA 94501  
(800) 688-2248 FAX: (510) 865-5225  
(510) 865-8644  
<http://www.operon.com>

**Optiscan**

P.O. Box 1066  
Mount Waverly MDC, Victoria  
Australia 3149  
61-3-9538 3333  
FAX: 61-3-9562 7742  
<http://www.optiscan.com.au>

**Optomax**

9 Ash Street  
P.O. Box 840  
Hollis, NH 03049  
(603) 465-3385 FAX: (603) 465-2291

**Opto-Line Associates**

265 Ballardvale Street  
Wilmington, MA 01887  
(978) 658-7255 FAX: (978) 658-7299  
<http://www.optoline.com>

**Orbigen**

6827 Nancy Ridge Drive  
San Diego, CA 92121  
(866) 672-4436 FAX: (858) 362-2030  
(858) 362-2026  
<http://www.orbigen.com>

**Oread BioSafety**

1501 Wakarusa Drive  
Lawrence, KS 66047  
(800) 447-6501 FAX: (785) 749-1882  
(785) 749-0034  
<http://www.oread.com>

**Suppliers**



**Organomation Associates Inc.**

266 River Road West  
Berlin, Massachusetts 01603-1699  
(888) 838-7300 FAX: (978) 838-2786  
<http://www.organomation.thomasregister.com>

**Organon**

375 Mount Pleasant Avenue  
West Orange, NJ 07052  
(800) 241-8812 FAX: (973) 325-4589  
(973) 325-4500  
<http://www.organon.com>

**Organon Teknika (Canada)**

30 North Wind Place  
Scarborough, Ontario  
M1S 3R5 Canada  
(416) 754-4344 FAX: (416) 754-4488  
<http://www.organonteknika.com>

**Organon Teknika Cappel**

100 Akzo Avenue  
Durham, NC 27712  
(800) 682-2666 FAX: (800) 432-9682  
(919) 620-2000 FAX: (919) 620-2107  
<http://www.organonteknika.com>

**Oriel Corporation of America**

150 Long Beach Boulevard  
Stratford, CT 06615  
(203) 377-8282 FAX: (203) 378-2457  
<http://www.oriel.com>

**OriGene Technologies**

6 Taft Court, Suite 300  
Rockville, MD 20850  
(888) 267-4436 FAX: (301) 340-9254  
(301) 340-3188  
<http://www.origene.com>

**OriginLab**

One Roundhouse Plaza  
Northhampton, MA 01060  
(800) 969-7720 FAX: (413) 585-0126  
<http://www.originlab.com>

**Orion Research**

500 Cummings Center  
Beverly, MA 01915  
(800) 225-1480 FAX: (978) 232-6015  
(978) 232-6000  
<http://www.orionres.com>

**Ortho Diagnostic Systems**

Subsidiary of Johnson & Johnson  
1001 U.S. Highway 202  
P.O. Box 350  
Raritan, NJ 08869  
(800) 322-6374 FAX: (908) 218-8582  
(908) 218-1300

**Ortho McNeil Pharmaceutical**

Welsh & McKean Road  
Spring House, PA 19477  
(800) 682-6532  
(215) 628-5000  
<http://www.orthomcneil.com>

**Oryza**

200 Turnpike Road, Unit 5  
Chelmsford, MA 01824  
(978) 256-8183 FAX: (978) 256-7434  
<http://www.oryzalabs.com>

**OSI Pharmaceuticals**

106 Charles Lindbergh Boulevard  
Uniondale, NY 11553  
(800) 662-2616 FAX: (516) 222-0114  
(516) 222-0023  
<http://www.osip.com>

**Osmonics**

135 Flanders Road  
P.O. Box 1046  
Westborough, MA 01581  
(800) 444-8212 FAX: (508) 366-5840  
(508) 366-8212  
<http://www.osmolabstore.com>

**Oster Professional Products**

150 Cadillac Lane  
McMinnville, TN 37110  
(931) 668-4121 FAX: (931) 668-4125  
<http://www.sunbeam.com>

**Out Patient Services**

1260 Holm Road  
Petaluma, CA 94954  
(800) 648-1666 FAX: (707) 762-7198  
(707) 763-1581

**OWL Scientific Plastics**

See OWL Separation Systems

**OWL Separation Systems**

55 Heritage Avenue  
Portsmouth, NH 03801  
(800) 242-5560 FAX: (603) 559-9258  
(603) 559-9297  
<http://www.owlsci.com>

**Oxford Biochemical Research**

P.O. Box 522  
Oxford, MI 48371  
(800) 692-4633 FAX: (248) 852-4466  
<http://www.oxfordbiomed.com>

**Oxford GlycoSystems**

See Glyco

**Oxford Instruments**

Old Station Way  
Eynsham  
Witney, Oxfordshire OX8 1TL, UK  
(44) 1865-881437  
FAX: (44) 1865-881944  
<http://www.oxinst.com>

**Oxford Labware**

See Kendall

**Oxford Molecular Group**

Oxford Science Park  
The Medawar Centre  
Oxford OX4 4GA, UK  
(44) 1865-784600  
FAX: (44) 1865-784601  
<http://www.oxmol.co.uk>

**Oxford Molecular Group**

2105 South Bascom Avenue, Suite 200  
Campbell, CA 95008  
(800) 876-9994 FAX: (408) 879-6302  
(408) 879-6300  
<http://www.oxmol.com>

**OXIS International**

6040 North Cutter Circle  
Suite 317  
Portland, OR 97217  
(800) 547-3686 FAX: (503) 283-4058  
(503) 283-3911  
<http://www.oxis.com>

**Oxoid**

800 Proctor Avenue  
Ogdensburg, NY 13669  
(800) 567-8378 FAX: (613) 226-3728  
<http://www.oxoid.ca>

**Oxoid**

Wade Road  
Basingstoke, Hampshire RG24 8PW,  
UK  
(44) 1256-841144  
FAX: (4) 1256-814626  
<http://www.oxoid.ca>

**Oxyrase**

P.O. Box 1345  
Mansfield, OH 44901  
(419) 589-8800 FAX: (419) 589-9919  
<http://www.oxyrase.com>

**OzoneLab Ultra Violet Products**

Ozone Services  
Division of Yanco Industries Ltd.  
390 Silver Queen Road  
Burton, B.C. V0G 1E0, Canada  
(250) 265-4461  
FAX: (250) 265-4482  
<http://www.ozoneservices.com>

**Ozyme**

10 Avenue Ampère  
Montigny de Bretonneux  
78180 France  
(33) 13-46-02-424  
FAX: (33) 13-46-09-212  
<http://www.ozyme.fr>

**PAA Laboratories**

2570 Route 724  
P.O. Box 435  
Parker Ford, PA 19457  
(610) 495-9400 FAX: (610) 495-9410  
<http://www.paa-labs.com>

**Pacer Scientific**

5649 Valley Oak Drive  
Los Angeles, CA 90068  
(323) 462-0636 FAX: (323) 462-1430  
<http://www.pacersci.com>

**Pacific Bio-Marine Labs**

P.O. Box 1348  
Venice, CA 90294  
(310) 677-1056 FAX: (310) 677-1207

**Packard Instrument**

800 Research Parkway  
Meriden, CT 06450  
(800) 323-1891 FAX: (203) 639-2172  
(203) 238-2351  
<http://www.packardinst.com>

**Padgett Instrument**

1730 Walnut Street  
Kansas City, MO 64108  
(816) 842-1029

**Pall Filtron**

50 Bearfoot Road  
Northborough, MA 01532  
(800) FILTRON FAX: (508) 393-1874  
(508) 393-1800

**Pall-Gelman**

25 Harbor Park Drive  
Port Washington, NY 11050  
(800) 289-6255 FAX: (516) 484-2651  
(516) 484-3600  
<http://www.pall.com>

**Panlab, S.L.**

C/ Energia, 112  
08940 Cornellà (Barcelona)  
Spain  
34-934-750-697  
<http://www.panlab.com>

**PanVera**

545 Science Drive  
Madison, WI 53711  
(800) 791-1400 FAX: (608) 233-3007  
(608) 233-9450  
<http://www.panvera.com>

**Parke-Davis**

See Warner-Lambert

**Parr Instrument**

211 53rd Street  
Moline, IL 61265  
(800) 872-7720 FAX: (309) 762-9453  
(309) 762-7716  
<http://www.parrinst.com>

**Partec**

Otto Hahn Strasse 32  
D-48161 Munster, Germany  
(49) 2534-8008-0  
FAX: (49) 2535-8008-90

**PCR**

See Archimica Florida

**PE Biosystems**

850 Lincoln Centre Drive  
Foster City, CA 94404  
(800) 345-5224 FAX: (650) 638-5884  
(650) 638-5800  
<http://www.pebio.com>

**Pel-Freez Biologicals**

219 N. Arkansas  
P.O. Box 68  
Rogers, AR 72757  
(800) 643-3426 FAX: (501) 636-3562  
(501) 636-4361  
<http://www.pelfreez-bio.com>

**Suppliers**

**Pel-Freez Clinical Systems**

Subsidiary of Pel-Freez Biologicals  
9099 N. Deerbrook Trail  
Brown Deer, WI 53223  
(800) 558-4511 FAX: (414) 357-4518  
(414) 357-4500  
<http://www.pelfreez-bio.com>

**Peninsula Laboratories**

601 Taylor Way  
San Carlos, CA 94070  
(800) 650-4442 FAX: (650) 595-4071  
(650) 592-5392  
<http://www.penlabs.com>

**Pentex**

24562 Mando Drive  
Laguna Niguel, CA 92677  
(800) 382-4667 FAX: (714) 643-2363  
<http://www.pentex.com>

**PeproTech**

5 Crescent Avenue  
P.O. Box 275 Rocky Hill, NJ 08553  
(800) 436-9910 FAX: (609) 497-0321  
(609) 497-0253  
<http://www.peprotech.com>

**Peptide Institute**

4-1-2 Ina, Minoh-shi Osaka 562-8686,  
Japan  
81-727-29-4121  
FAX: 81-727-29-4124  
<http://www.peptide.co.jp>

**Peptide Laboratory**

4175 Lakeside Drive  
Richmond, CA 94806  
(800) 858-7322 FAX: (510) 262-9127  
(510) 262-0800  
<http://www.peptidelab.com>

**Peptides International**

11621 Electron Drive  
Louisville, KY 40299  
(800) 777-4779 FAX: (502) 267-1329  
(502) 266-8787  
<http://www.pepnet.com>

**Perceptive Science Instruments**

2525 South Shore Boulevard,  
Suite 100  
League City, TX 77573 (281) 334-3027  
FAX: (281) 538-2222  
<http://www.persci.com>

**Perimed**

4873 Princeton Drive  
North Royalton, OH 44133  
(440) 877-0537 FAX: (440) 877-0534  
<http://www.perimed.se>

**Perkin-Elmer**

761 Main Avenue  
Norwalk, CT 06859  
(800) 762-4002 FAX: (203) 762-6000  
(203) 762-1000  
<http://www.perkin-elmer.com>  
See also PE Biosystems

**PerSeptive Bioresearch Products**

See PerSeptive BioSystems

**PerSeptive BioSystems**

500 Old Connecticut Path  
Framingham, MA 01701  
(800) 899-5858 FAX: (508) 383-7885  
(508) 383-7700  
<http://www.pbio.com>

**PerSeptive Diagnostic**

See PE Biosystems  
(800) 343-1346

**Pettersson Elektronik AB**

Tallbacksvagen 51  
S-756 45 Uppsala, Sweden  
(46) 1830-3880 FAX: (46) 1830-3840  
<http://www.bahnhof.se/~pettersson>

**Pfanstiehl Laboratories, Inc.**

1219 Glen Rock Avenue  
Waukegan, IL 60085  
(800) 383-0126 FAX: (847) 623-9173  
<http://www.pfanstiehl.com>

**PGC Scientifics**

7311 Governors Way  
Frederick, MD 21704  
(800) 424-3300 FAX: (800) 662-1112  
(301) 620-7777 FAX: (301) 620-7497  
<http://www.pgcscientifics.com>

**Pharmacia Biotech**

See Amersham Pharmacia Biotech

**Pharmacia Diagnostics**

See Wallac

**Pharmacia LKB Biotech**

See Amersham Pharmacia Biotech

**Pharmacia LKB Biotechnology**

See Amersham Pharmacia Biotech

**Pharmacia LKB Nuclear**

See Wallac

**Pharmaderm Veterinary Products**

60 Baylis Road  
Melville, NY 11747  
(800) 432-6673  
<http://www.pharmaderm.com>

**Pharmed (Norton)**

Norton Performance Plastics  
See Saint-Gobain Performance  
Plastics

**PharMingen**

See BD PharMingen

**Phenomex**

2320 W. 205th Street  
Torrance, CA 90501  
(310) 212-0555 FAX: (310) 328-7768  
<http://www.phenomex.com>

**PHLS Centre for Applied**

Microbiology and Research  
See European Collection of Animal  
Cell Cultures (ECACC)

**Phoenix Flow Systems**

11575 Sorrento Valley Road, Suite 208  
San Diego, CA 92121  
(800) 886-3569 FAX: (619) 259-5268  
(619) 453-5095  
<http://www.phnxflow.com>

**Phoenix Pharmaceutical**

4261 Easton Road, P.O. Box 6457  
St. Joseph, MO 64506  
(800) 759-3644 FAX: (816) 364-4969  
(816) 364-5777  
<http://www.phoenixpharmaceutical.com>

**Phoretix International**

Cale Cross House  
Newcastle upon Tyne  
NE1 6SU, UK  
(44) (0)-19-230-2121  
FAX: (44) (0)-191-230-2131  
[http://pavelodrazka.tripod.com/  
www\\_phoretix.com](http://pavelodrazka.tripod.com/www_phoretix.com)

**Photometrics**

See Roper Scientific

**Photon Technology International**

1 Deepark Drive, Suite F  
Monmouth Junction, NJ 08852  
(732) 329-0910 FAX: (732) 329-9069  
<http://www.pti-nj.com>

**Physik Instrumente**

Polytec PI  
23 Midstate Drive, Suite 212  
Auburn, MA 01501  
(508) 832-3456 FAX: (508) 832-0506  
<http://www.polytepci.com>

**Physitemp Instruments**

154 Huron Avenue  
Clifton, NJ 07013  
(800) 452-8510 FAX: (973) 779-5954  
(973) 779-5577  
<http://www.physitemp.com>

**Pico Technology**

The Mill House, Cambridge Street  
St. Neots, Cambridgeshire  
PE19 1QB, UK  
(44) 1480-396-395  
FAX: (44) 1480-396-296  
<http://www.picotech.com>

**Pierce Chemical**

P.O. Box 117  
3747 Meridian Road  
Rockford, IL 61105  
(800) 874-3723 FAX: (800) 842-5007  
FAX: (815) 968-7316  
<http://www.piercenet.com>

**Pierce & Warriner**

44, Upper Northgate Street  
Chester, Cheshire CH1 4EF, UK  
(44) 1244 382 525  
FAX: (44) 1244 373 212  
<http://www.piercenet.com>

**Pilling Weck Surgical**

420 Delaware Drive  
Fort Washington, PA 19034  
(800) 523-2579 FAX: (800) 332-2308  
<http://www.pilling-weck.com>

**PixelVision**

A division of Cybex Computer Products  
14964 NW Greenbrier Parkway  
Beaverton, OR 97006  
(503) 629-3210 FAX: (503) 629-3211  
<http://www.pixelvision.com>

**P.J. Noyes**

P.O. Box 381  
89 Bridge Street  
Lancaster, NH 03584  
(800) 522-2469 FAX: (603) 788-3873  
(603) 788-4952  
<http://www.pjnoyes.com>

**Plas-Labs**

917 E. Chilson Street  
Lansing, MI 48906  
(800) 866-7527 FAX: (517) 372-2857  
(517) 372-7177  
<http://www.plas-labs.com>

**Plastics One**

6591 Merriman Road, Southwest  
P.O. Box 12004  
Roanoke, VA 24018  
(540) 772-7950 FAX: (540) 989-7519  
<http://www.plastics1.com>

**Platt Electric Supply**

2757 6th Avenue South  
Seattle, WA 98134  
(206) 624-4083 FAX: (206) 343-6342  
<http://www.platt.com>

**Plexon**

6500 Greenville Avenue  
Suite 730  
Dallas, TX 75206  
(214) 369-4957 FAX: (214) 369-1775  
<http://www.plexoninc.com>

**Polaroid**

784 Memorial Drive  
Cambridge, MA 01239  
(800) 225-1618 FAX: (800) 832-9003  
(781) 386-2000  
<http://www.polaroid.com>

**Polyfiltronics**

136 Weymouth St.  
Rockland, MA 02370  
(800) 434-7659 FAX: (781) 878-0822  
(781) 878-1133  
<http://www.polyfiltronics.com>

**Polylabo Paul Block**

Parc Tertiaire de la Meinau  
10, rue de la Durance  
B.P. 36  
67023 Strasbourg Cedex 1  
Strasbourg, France  
33-3-8865-8020  
FAX: 33-3-8865-8039

**Suppliers**

**PolyLC**

9151 Rumsey Road, Suite 180  
Columbia, MD 21045  
(410) 992-5400 FAX: (410) 730-8340

**Polymer Laboratories**

Amherst Research Park  
160 Old Farm Road  
Amherst, MA 01002  
(800) 767-3963 FAX: (413) 253-2476  
<http://www.polymerlabs.com>

**Polymicro Technologies**

18019 North 25th Avenue  
Phoenix, AZ 85023  
(602) 375-4100 FAX: (602) 375-4110  
<http://www.polymicro.com>

**Polyphenols AS**

Hanabryggene Technology Centre  
Hanaveien 4-6  
4327 Sandnes, Norway  
(47) 51-62-0990  
FAX: (47) 51-62-51-82  
<http://www.polyphenols.com>

**Polysciences**

400 Valley Road  
Warrington, PA 18976  
(800) 523-2575 FAX: (800) 343-3291  
<http://www.polysciences.com>

**Polyscientific**

70 Cleveland Avenue  
Bayshore, NY 11706  
(516) 586-0400 FAX: (516) 254-0618

**Polytech Products**

285 Washington Street  
Somerville, MA 02143  
(617) 666-5064 FAX: (617) 625-0975

**Polytron**

8585 Grovemont Circle  
Gaithersburg, MD 20877  
(301) 208-6597 FAX: (301) 208-8691  
<http://www.polytron.com>

**Popper and Sons**

300 Denton Avenue  
P.O. Box 128  
New Hyde Park, NY 11040  
(888) 717-7677 FAX: (800) 557-6773  
(516) 248-0300 FAX: (516) 747-1188  
<http://www.popperandsons.com>

**Porphyrim Products**

P.O. Box 31  
Logan, UT 84323  
(435) 753-1901 FAX: (435) 753-6731  
<http://www.porphyrin.com>

**Portex**

See SIMS Portex Limited

**Powderject Vaccines**

585 Science Drive  
Madison, WI 53711  
(608) 231-3150 FAX: (608) 231-6990  
<http://www.powderject.com>

**Praxair**

810 Jorie Boulevard  
Oak Brook, IL 60521  
(800) 621-7100  
<http://www.praxair.com>

**Precision Dynamics**

13880 Del Sur Street  
San Fernando, CA 91340  
(800) 847-0670 FAX: (818) 899-4-45  
<http://www.pdcorp.com>

**Precision Scientific Laboratory  
Equipment**

Division of Jouan  
170 Marcel Drive  
Winchester, VA 22602  
(800) 621-8820 FAX: (540) 869-0130  
(540) 869-9892  
<http://www.precisionsci.com>

**Primary Care Diagnostics**

See Becton Dickinson Primary  
Care Diagnostics

**Primate Products**

1755 East Bayshore Road, Suite 28A  
Redwood City, CA 94063  
(650) 368-0663 FAX: (650) 368-0665  
<http://www.primateproducts.com>

**5 Prime → 3 Prime**

See 2000 Eppendorf-5 Prime  
<http://www.5prime.com>

**Princeton Applied Research**

PerkinElmer Instr.: Electrochemistry  
801 S. Illinois  
Oak Ridge, TN 37830  
(800) 366-2741 FAX: (423) 425-1334  
(423) 481-2442  
<http://www.eggpar.com>

**Princeton Instruments**

A division of Roper Scientific  
3660 Quakerbridge Road  
Trenton, NJ 08619  
(609) 587-9797 FAX: (609) 587-1970  
<http://www.prinst.com>

**Princeton Separations**

P.O. Box 300  
Aldephia, NJ 07710  
(800) 223-0902 FAX: (732) 431-3768  
(732) 431-3338

**Prior Scientific**

80 Reservoir Park Drive  
Rockland, MA 02370  
(781) 878-8442 FAX: (781) 878-8736  
<http://www.prior.com>

**PRO Scientific**

P.O. Box 448  
Monroe, CT 06468  
(203) 452-9431 FAX: (203) 452-9753  
<http://www.proscientific.com>

**Professional Compounding Centers  
of America**

9901 South Wilcrest Drive  
Houston, TX 77099  
(800) 331-2498 FAX: (281) 933-6227  
(281) 933-6948  
<http://www.pccarx.com>

**Progen Biotechnik**

Maass-Str. 30  
69123 Heidelberg, Germany  
(49) 6221-8278-0  
FAX: (49) 6221-8278-23  
<http://www.progen.de>

**Prolabo**

A division of Merck Eurolab  
54 rue Roger Salengro  
94126 Fontenay Sous Bois Cedex  
France  
33-1-4514-8500  
FAX: 33-1-4514-8616  
<http://www.prolabo.fr>

**Prologo**

2995 Wilderness Place Boulder, CO  
80301  
(888) 80-OLIGO  
FAX: (303) 801-1134  
<http://www.prologo.com>

**Promega**

2800 Woods Hollow Road  
Madison, WI 53711  
(800) 356-9526 FAX: (800) 356-1970  
(608) 274-4330 FAX: (608) 277-2516  
<http://www.promega.com>

**Protein Databases (PDI)**

405 Oakwood Road  
Huntington Station, NY 11746  
(800) 777-6834 FAX: (516) 673-4502  
(516) 673-3939

**Protein Polymer Technologies**

10655 Sorrento Valley Road  
San Diego, CA 92121  
(619) 558-6064 FAX: (619) 558-6477  
<http://www.ppti.com>

**Protein Solutions**

391 G Chipeta Way  
Salt Lake City, UT 84108  
(801) 583-9301 FAX: (801) 583-4463  
<http://www.proteinsolutions.com>

**Prozyme**

1933 Davis Street, Suite 207  
San Leandro, CA 94577  
(800) 457-9444 FAX: (510) 638-6919  
(510) 638-6900  
<http://www.prozyme.com>

**PSI**

See Perceptive Science Instruments

**Pulmetrics Group**

82 Beacon Street  
Chestnut Hill, MA 02167  
(617) 353-3833 FAX: (617) 353-6766

**Purdue Frederick**

100 Connecticut Avenue  
Norwalk, CT 06850  
(800) 633-4741 FAX: (203) 838-1576  
(203) 853-0123  
<http://www.pharma.com>

**Purina Mills**

LabDiet  
P. O. Box 66812  
St. Louis, MO 63166  
(800) 227-8941 FAX: (314) 768-4894  
<http://www.purina-mills.com>

**Qbiogene**

2251 Rutherford Road  
Carlsbad, CA 92008  
(800) 424-6101 FAX: (760) 918-9313  
<http://www.qbiogene.com>

**Qiagen**

28159 Avenue Stanford  
Valencia, CA 91355  
(800) 426-8157 FAX: (800) 718-2056  
<http://www.qiagen.com>

**Quality Biological**

7581 Lindbergh Drive  
Gaithersburg, MD 20879  
(800) 443-9331 FAX: (301) 840-5450  
(301) 840-9331  
<http://www.qualitybiological.com>

**Quantitative Technologies**

P.O. Box 470  
Salem Industrial Park, Bldg. 5  
Whitehouse, NJ 08888  
(908) 534-4445 FAX: (908) 534-1054  
<http://www.qtionline.com>

**Quantum Appligene**

Parc d'Innovation  
Rue Geller de Kayserberg  
67402 Illkirch, Cedex, France  
(33) 3-8867-5425  
FAX: (33) 3-8867-1945  
<http://www.quantum-appligene.com>

**Quantum Biotechnologies**

See Qbiogene

**Quantum Soft**

Postfach 6613  
CH-8023  
Zürich, Switzerland  
FAX: 41-1-481-69-51  
profit@quansoft.com

**Questcor Pharmaceuticals**

26118 Research Road  
Hayward, CA 94545  
(510) 732-5551 FAX: (510) 732-7741  
<http://www.questcor.com>

**Quidel**

10165 McKellar Court  
San Diego, CA 92121  
(800) 874-1517 FAX: (858) 546-8955  
(858) 552-1100  
<http://www.quidel.com>

**Suppliers**

**R-Biopharm**

7950 Old US 27 South  
Marshall, MI 49068  
(616) 789-3033 FAX: (616) 789-3070  
<http://www.r-biopharm.com>

**R. C. Electronics**

6464 Hollister Avenue  
Santa Barbara, CA 93117  
(805) 685-7770 FAX: (805) 685-5853  
<http://www.rcelectronics.com>

**R & D Systems**

614 McKinley Place NE  
Minneapolis, MN 55413  
(800) 343-7475 FAX: (612) 379-6580  
(612) 379-2956  
<http://www.rndsystms.com>

**R & S Technology**

350 Columbia Street  
Peacedale, RI 02880  
(401) 789-5660 FAX: (401) 792-3890  
<http://www.septech.com>

**RACAL Health and Safety**

See 3M  
7305 Executive Way  
Frederick, MD 21704  
(800) 692-9500 FAX: (301) 695-8200

**Radiometer America**

811 Sharon Drive  
Westlake, OH 44145  
(800) 736-0600 FAX: (440) 871-2633  
(440) 871-8900  
<http://www.rameusa.com>

**Radiometer A/S**

The Chemical Reference Laboratory  
kandevej 21  
DK-2700 Brnshj, Denmark  
45-3827-3827 FAX: 45-3827-2727

**Radionics**

22 Terry Avenue  
Burlington, MA 01803  
(781) 272-1233 FAX: (781) 272-2428  
<http://www.radionics.com>

**Radnoti Glass Technology**

227 W. Maple Avenue  
Monrovia, CA 91016  
(800) 428-1416 FAX: (626) 303-2998  
(626) 357-8827  
<http://www.radnoti.com>

**Rainin Instrument**

Rainin Road  
P.O. Box 4026  
Woburn, MA 01888  
(800)-4-RAININ FAX: (781) 938-1152  
(781) 935-3050  
<http://www.rainin.com>

**Raj Scientific Industries**

601-A Wing  
Hemavathi Co-op. HSG.  
Society, Plot No. 9, Sector No. 7  
Charkop, Kandivali (W)  
Mumbai, 400 067, India  
<http://www.rajscientificind.com/>

**Rank Brothers**

56 High Street  
Bottisham, Cambridge  
CB5 9DA UK  
(44) 1223 811369  
FAX: (44) 1223 811441  
<http://www.rankbrothers.com>

**Rapp Polymere**

Ernst-Simon Strasse 9  
D 72072 Tübingen, Germany  
(49) 7071-763157  
FAX: (49) 7071-763158  
<http://www.rapp-polymere.com>

**Raven Biological Laboratories**

8607 Park Drive  
P.O. Box 27261  
Omaha, NE 68127  
(800) 728-5702 FAX: (402) 593-0995  
(402) 593-0781  
<http://www.ravenlabs.com>

**Razel Scientific Instruments**

100 Research Drive  
Stamford, CT 06906  
(203) 324-9914 FAX: (203) 324-5568

**Reagents International**

See Biotech Source

**Receptor Biology**

10000 Virginia Manor Road, Suite 360  
Beltsville, MD 20705  
(888) 707-4200 FAX: (301) 210-6266  
(301) 210-4700  
<http://www.receptorbiology.com>

**Regis Technologies**

8210 N. Austin Avenue  
Morton Grove, IL 60053  
(800) 323-8144 FAX: (847) 967-1214  
(847) 967-6000  
<http://www.registech.com>

**Reichert Ophthalmic Instruments**

P.O. Box 123  
Buffalo, NY 14240  
(716) 686-4500 FAX: (716) 686-4545  
<http://www.reichert.com>

**Reiss**

1 Polymer Place  
P.O. Box 60 Blackstone, VA 23824  
(800) 356-2829 FAX: (804) 292-1757  
(804) 292-1600  
<http://www.reissmfg.com>

**Remel**

12076 Santa Fe Trail Drive  
P.O. Box 14428  
Shawnee Mission, KS 66215  
(800) 255-6730 FAX: (800) 621-8251  
(913) 888-0939 FAX: (913) 888-5884  
<http://www.remelinc.com>

**Reming Bioinstruments**

6680 County Route 17  
Redfield, NY 13437  
(315) 387-3414 FAX: (315) 387-3415

**RepliGen**

117 Fourth Avenue  
Needham, MA 02494  
(800) 622-2259 FAX: (781) 453-0048  
(781) 449-9560  
<http://www.repligen.com>

**Research Biochemicals**

1 Strathmore Road  
Natick, MA 01760  
(800) 736-3690 FAX: (800) 736-2480  
(508) 651-8151 FAX: (508) 655-1359  
<http://www.resbio.com>

**Research Corporation Technologies**

101 N. Wilmot Road, Suite 600  
Tucson, AZ 85711  
(520) 748-4400 FAX: (520) 748-0025  
<http://www.rctech.com>

**Research Diagnostics**

Pleasant Hill Road  
Flanders, NJ 07836  
(800) 631-9384 FAX: (973) 584-0210  
(973) 584-7093  
<http://www.researchd.com>

**Research Diets**

121 Jersey Avenue  
New Brunswick, NJ 08901  
(877) 486-2486 FAX: (732) 247-2340  
(732) 247-2390  
<http://www.researchdiets.com>

**Research Genetics**

2130 South Memorial Parkway  
Huntsville, AL 35801  
(800) 533-4363 FAX: (256) 536-9016  
(256) 533-4363  
<http://www.resgen.com>

**Research Instruments**

Kernick Road Pernryn  
Cornwall TR10 9DQ, UK  
(44) 1326-372-753  
FAX: (44) 1326-378-783  
<http://www.research-instruments.com>

**Research Organics**

4353 E. 49th Street  
Cleveland, OH 44125  
(800) 321-0570 FAX: (216) 883-1576  
(216) 883-8025  
<http://www.resorg.com>

**Research Plus**

P.O. Box 324  
Bayonne, NJ 07002  
(800) 341-2296 FAX: (201) 823-9590  
(201) 823-3592  
<http://www.researchplus.com>

**Research Products International**

410 N. Business Center Drive  
Mount Prospect, IL 60056  
(800) 323-9814 FAX: (847) 635-1177  
(847) 635-7330  
<http://www.rpicorp.com>

**Research Triangle Institute**

P.O. Box 12194  
Research Triangle Park, NC 27709  
(919) 541-6000 FAX: (919) 541-6515  
<http://www.rti.org>

**Restek**

110 Benner Circle  
Bellefonte, PA 16823  
(800) 356-1688 FAX: (814) 353-1309  
(814) 353-1300  
<http://www.restekcorp.com>

**Rheodyne**

P.O. Box 1909  
Rohnert Park, CA 94927  
(707) 588-2000 FAX: (707) 588-2020  
<http://www.rheodyne.com>

**Rhone Merieux**

See Merial Limited

**Rhone-Poulenc**

2 T W Alexander Drive  
P.O. Box 12014  
Research Triangle Park, NC 08512  
(919) 549-2000 FAX: (919) 549-2839  
<http://www.Rhone-Poulenc.com>  
Also see Aventis

**Rhone-Poulenc Rorer**

500 Arcola Road  
Collegeville, PA 19426  
(800) 727-6737 FAX: (610) 454-8940  
(610) 454-8975  
<http://www.rp-rorer.com>

**Rhone-Poulenc Rorer**

Centre de Recherche de  
Vitry-Alfortville  
13 Quai Jules Guesde, BP14 94403  
Vitry Sur Seine, Cedex, France  
(33) 145-73-85-11  
FAX: (33) 145-73-81-29  
<http://www.rp-rorer.com>

**Ribi ImmunoChem Research**

563 Old Corvallis Road  
Hamilton, MT 59840  
(800) 548-7424 FAX: (406) 363-6129  
(406) 363-3131  
<http://www.ribi.com>

**RiboGene**

See Questcor Pharmaceuticals

**Ricca Chemical**

448 West Fork Drive  
Arlington, TX 76012  
(888) GO-RICCA  
FAX: (800) RICCA-93  
(817) 461-5601  
<http://www.riccachemical.com>

**Richard-Allan Scientific**

225 Parsons Street  
Kalamazoo, MI 49007  
(800) 522-7270 FAX: (616) 345-3577  
(616) 344-2400  
<http://www.rallansci.com>

**Suppliers**

**Richelieu Biotechnologies**

11 177 Hamon  
Montral, Quebec  
H3M 3E4 Canada  
(802) 863-2567 FAX: (802) 862-2909  
<http://www.richelieubio.com>

**Richter Enterprises**

20 Lake Shore Drive  
Wayland, MA 01778  
(508) 655-7632 FAX: (508) 652-7264  
<http://www.richter-enterprises.com>

**Riese Enterprises**

BioSure Division  
12301 G Loma Rica Drive  
Grass Valley, CA 95945  
(800) 345-2267 FAX: (916) 273-5097  
(916) 273-5095  
<http://www.biosure.com>

**Robbins Scientific**

1250 Elko Drive  
Sunnyvale, CA 94086  
(800) 752-8585 FAX: (408) 734-0300  
(408) 734-8500  
<http://www.robsci.com>

**Roboz Surgical Instruments**

9210 Corporate Boulevard, Suite 220  
Rockville, MD 20850  
(800) 424-2984 FAX: (301) 590-1290  
(301) 590-0055

**Roche Applied Science**

See Roche Diagnostics

**Roche Diagnostics**

9115 Hague Road  
P.O. Box 50457  
Indianapolis, IN 46256  
(800) 262-1640 FAX: (317) 845-7120  
(317) 845-2000  
<http://www.roche.com>

**Roche Molecular Systems**

See Roche Diagnostics

**Rocklabs**

P.O. Box 18-142  
Auckland 6, New Zealand  
(64) 9-634-7696  
FAX: (64) 9-634-7696  
<http://www.rocklabs.com>

**Rockland**

P.O. Box 316  
Gilbertsville, PA 19525  
(800) 656-ROCK  
FAX: (610) 367-7825  
(610) 369-1008  
<http://www.rockland-inc.com>

**Rohm**

Chemische Fabrik  
Kirschenallee  
D-64293 Darmstadt, Germany  
(49) 6151-1801 FAX: (49) 6151-1802  
<http://www.roehm.com>

**Rohm and Haas Company**

100 Independence Mall West  
Philadelphia, PA 19106-2399  
215-592-3000 FAX: 215-592-3377  
<http://www.rohmhaas.com>

**Roper Scientific**

3440 East Britannia Drive, Suite 100  
Tucson, AZ 85706  
(520) 889-9933 FAX: (520) 573-1944  
<http://www.roperscientific.com>

**Rosetta Inpharmatics**

12040 115th Avenue NE  
Kirkland, WA 98034  
(425) 820-8900 FAX: (425) 820-5757  
<http://www.rii.com>

**ROTH-SOCHIEL**

3 rue de la Chapelle  
Lauterbourg  
67630 France  
(33) 03-88-94-82-42  
FAX: (33) 03-88-54-63-93

**Rotronic Instrument**

160 E. Main Street  
Huntington, NY 11743  
(631) 427-3898 FAX: (631) 427-3902  
<http://www.rotrotron-usa.com>

**Roundy's**

23000 Roundy Drive  
Pewaukee, WI 53072  
(262) 953-7999 FAX: (262) 953-7989  
<http://www.roundys.com>

**RS Components**

Birchington Road  
Weldon Industrial Estate  
Corby, Northants NN17 9RS, UK  
(44) 1536 201234  
FAX: (44) 1536 405678  
<http://www.rs-components.com>

**Rubbermaid**

See Newell Rubbermaid

**SA Instrumentation**

1437 Tzena Way  
Encinitas, CA 92024  
(858) 453-1776 FAX: (800) 266-1776  
<http://www.sainst.com>

**Safe Cells**

See Bionique Testing Labs

**Sage Instruments**

240 Airport Boulevard  
Freedom, CA 95076  
831-761-1000 FAX: 831-761-1008  
<http://www.sageinst.com>

**Sage Laboratories**

11 Huron Drive  
Natick, MA 01760  
(508) 653-0844 FAX: 508-653-5671  
<http://www.sagelabs.com>

**Saint-Gobain Performance Plastics**

P.O. Box 3660  
Akron, OH 44309  
(330) 798-9240 FAX: (330) 798-6968  
<http://www.nortonplastics.com>

**San Diego Instruments**

7758 Arjons Drive  
San Diego, CA 92126  
(858) 530-2600 FAX: (858) 530-2646  
<http://www.sd-inst.com>

**Sandown Scientific**

Beards Lodge  
25 Oldfield Road  
Hampden, Middlesex TW12 2AJ, UK  
(44) 2089 793300  
FAX: (44) 2089 793311  
<http://www.sandownsci.com>

**Sandoz Pharmaceuticals**

See Novartis

**Sanofi Recherche**

Centre de Montpellier  
371 Rue du Professor Blayac  
34184 Montpellier, Cedex 04  
France  
(33) 67-10-67-10  
FAX: (33) 67-10-67-67

**Sanofi Winthrop Pharmaceuticals**

90 Park Avenue  
New York, NY 10016  
(800) 223-5511 FAX: (800) 933-3243  
(212) 551-4000  
<http://www.sanofi-synthelabo.com/us>

**Sanquin**

Postbus 9892  
1006 AN  
Amsterdam, The Netherlands  
(20) 512-3000 FAX: (20) 512-3303  
<http://www.sanquin.nl>  
<http://www.sanquinreagents.com>

**Santa Cruz Biotechnology**

2161 Delaware Avenue  
Santa Cruz, CA 95060  
(800) 457-3801 FAX: (831) 457-3801  
(831) 457-3800  
<http://www.scbt.com>

**Sarasep**

(800) 605-0267 FAX: (408) 432-3231  
(408) 432-3230  
<http://www.transgenomic.com>

**Sarstedt**

P.O. Box 468  
Newton, NC 28658  
(800) 257-5101 FAX: (828) 465-4003  
(828) 465-4000  
<http://www.sarstedt.com>

**Sartorius**

131 Heartsland Boulevard  
Edgewood, NY 11717  
(800) 368-7178 FAX: (516) 254-4253  
<http://www.sartorius.com>

**SAS Institute**

Pacific Telesis Center  
One Montgomery Street  
San Francisco, CA 94104  
(415) 421-2227 FAX: (415) 421-1213  
<http://www.sas.com>

**Savant/EC Apparatus**

A ThermoQuest company  
100 Colin Drive  
Holbrook, NY 11741  
(800) 634-8886 FAX: (516) 244-0606  
(516) 244-2929  
<http://www.savec.com>

**Savillex**

6133 Baker Road  
Minnetonka, MN 55345  
(612) 935-5427

**Scanalytics**

Division of CSP  
8550 Lee Highway, Suite 400  
Fairfax, VA 22031  
(800) 325-3110 FAX: (703) 208-1960  
(703) 208-2230  
<http://www.scanalytics.com>

**Schering Laboratories**

See Schering-Plough

**Schering-Plough**

1 Giralda Farms  
Madison, NJ 07940  
(800) 222-7579 FAX: (973) 822-7048  
(973) 822-7000  
<http://www.schering-plough.com>

**Schleicher & Schuell**

10 Optical Avenue  
Keene, NH 03431  
(800) 245-4024 FAX: (603) 357-3627  
(603) 352-3810  
<http://www.s-und-s.de/english-index.html>

**Science Technology Centre**

1250 Herzberg Laboratories  
Carleton University  
1125 Colonel Bay Drive  
Ottawa, Ontario  
K1S 5B6 Canada  
(613) 520-4442 FAX: (613) 520-4445  
<http://www.carleton.ca/universities/stc>

**Scientific Instruments**

200 Saw Mill River Road  
Hawthorne, NY 10532  
(800) 431-1956 FAX: (914) 769-5473  
(914) 769-5700  
<http://www.scientificinstruments.com>

**Scientific Solutions**

9323 Hamilton  
Mentor, OH 44060  
(440) 357-1400 FAX: (440) 357-1416  
<http://www.labmaster.com>

**Suppliers**

**Scion**

82 Worman's Mill Court, Suite H  
Frederick, MD 21701  
(301) 695-7870 FAX: (301) 695-0035  
<http://www.scioncorp.com>

**Scott Specialty Gases**

6141 Easton Road  
P.O. Box 310  
Plumsteadville, PA 18949  
(800) 21-SCOTT  
FAX: (215) 766-2476  
(215) 766-8861  
<http://www.scottgas.com>

**Scripps Clinic and Research Foundation**

Instrumentation and Design Lab  
10666 N. Torrey Pines Road  
La Jolla, CA 92037  
(800) 992-9962 FAX: (858) 554-8986  
(858) 455-9100  
<http://www.scrippsclinic.com>

**SDI Sensor Devices**

407 Pilot Court, 400A  
Waukesha, WI 53188  
(414) 524-1000 FAX: (414) 524-1009

**Sefar America**

111 Calumet Street  
Depew, NY 14043  
(716) 683-4050 FAX: (716) 683-4053  
<http://www.sefaramerica.com>

**Seikagaku America**

Division of Associates of Cape Cod  
704 Main Street  
Falmouth, MA 02540  
(800) 237-4512 FAX: (508) 540-8680  
(508) 540-3444  
<http://www.seikagaku.com>

**Sellas Medizinische Gerate**

Hagener Str. 393  
Gevelsberg-Vogelsang, 58285  
Germany  
(49) 23-326-1225

**Sensor Medics**

22705 Savi Ranch Parkway  
Yorba Linda, CA 92887  
(800) 231-2466 FAX: (714) 283-8439  
(714) 283-2228  
<http://www.sensormedics.com>

**Sensor Systems LLC**

2800 Anvil Street, North  
Saint Petersburg, FL 33710  
(800) 688-2181 FAX: (727) 347-3881  
(727) 347-2181  
<http://www.vsensors.com>

**SenSym/Foxboro ICT**

1804 McCarthy Boulevard  
Milpitas, CA 95035  
(800) 392-9934 FAX: (408) 954-9458  
(408) 954-6700  
<http://www.sensym.com>

**Separations Group**

See Vydac

**Sepracor**

111 Locke Drive  
Marlboro, MA 01752  
(877)-SEPRACOR (508) 357-7300  
<http://www.sepracor.com>

**Sera-Lab**

See Harlan Sera-Lab

**Sermeter**

925 Seton Court, #7  
Wheeling, IL 60090  
(847) 537-4747

**Serological**

195 W. Birch Street  
Kankakee, IL 60901  
(800) 227-9412 FAX: (815) 937-8285  
(815) 937-8270

**Seromed Biochrom**

Leonorenstrasse 2-6  
D-12247 Berlin, Germany  
(49) 030-779-9060

**Serotec**

22 Bankside  
Station Approach  
Kidlington, Oxford OX5 1JE, UK  
(44) 1865-852722  
FAX: (44) 1865-373899  
In the US: (800) 265-7376  
<http://www.serotec.co.uk>

**Serva Biochemicals**

Distributed by Crescent Chemical

**S.F. Medical Pharmlast**

See Chase-Walton Elastomers

**SGE**

2007 Kramer Lane  
Austin, TX 78758  
(800) 945-6154 FAX: (512) 836-9159  
(512) 837-7190  
<http://www.sge.com>

**Shandon/Lipshaw**

171 Industry Drive  
Pittsburgh, PA 15275  
(800) 245-6212 FAX: (412) 788-1138  
(412) 788-1133  
<http://www.shandon.com>

**Sharpoint**

P.O. Box 2212  
Taichung, Taiwan  
Republic of China  
(886) 4-3206320  
FAX: (886) 4-3289879  
<http://www.sharpoint.com.tw>

**Shelton Scientific**

230 Longhill Crossroads  
Shelton, CT 06484  
(800) 222-2092 FAX: (203) 929-2175  
(203) 929-8999  
<http://www.sheltonscientific.com>

**Sherwood-Davis & Geck**

See Kendall

**Sherwood Medical**

See Kendall

**Shimadzu Scientific Instruments**

7102 Riverwood Drive  
Columbia, MD 21046  
(800) 477-1227 FAX: (410) 381-1222  
(410) 381-1227  
<http://www.ssi.shimadzu.com>

**Sialomed**

See Amika

**Siemens Analytical X-Ray Systems**

See Bruker Analytical X-Ray Systems

**Sievers Instruments**

Subsidiary of Ionics  
6060 Spine Road  
Boulder, CO 80301  
(800) 255-6964 FAX: (303) 444-6272  
(303) 444-2009  
<http://www.sieversinst.com>

**SIFCO**

970 East 46th Street  
Cleveland, OH 44103  
(216) 881-8600 FAX: (216) 432-6281  
<http://www.sifco.com>

**Sigma-Aldrich**

3050 Spruce Street  
St. Louis, MO 63103  
(800) 358-5287 FAX: (800) 962-9591  
(800) 325-3101 FAX: (800) 325-5052  
<http://www.sigma-aldrich.com>

**Sigma-Aldrich Canada**

2149 Winston Park Drive  
Oakville, Ontario  
L6H 6J8 Canada  
(800) 5652-1400  
FAX: (800) 2652-3858  
<http://www.sigma-aldrich.com>

**Silenus/Amrad**

34 Wadhurst Drive  
Boronia, Victoria 3155 Australia  
(613) 9887-3909  
FAX: (613) 9887-3912  
<http://www.amrad.com.au>

**Silicon Genetics**

2601 Spring Street  
Redwood City, CA 94063  
(866) SIG SOFT  
FAX: (650) 365 1735  
(650) 367 9600  
<http://www.sigenetics.com>

**SIMS Deltec**

1265 Grey Fox Road  
St. Paul, Minnesota 55112  
(800) 426-2448 FAX: (615) 628-7459  
<http://www.deltec.com>

**SIMS Portex**

10 Bowman Drive  
Keene, NH 03431  
(800) 258-5361 FAX: (603) 352-3703  
(603) 352-3812  
<http://www.simsmed.com>

**SIMS Portex Limited**

Hythe, Kent CT21 6JL, UK  
(44)1303-260551  
FAX: (44)1303-266761  
<http://www.portex.com>

**Siris Laboratories**

See Biosearch Technologies

**Skatron Instruments**

See Molecular Devices

**SLM Instruments**

See Spectronic Instruments

**SLM-AMINCO Instruments**

See Spectronic Instruments

**Small Parts**

13980 NW 58th Court  
P.O. Box 4650  
Miami Lakes, FL 33014  
(800) 220-4242 FAX: (800) 423-9009  
(305) 558-1038 FAX: (305) 558-0509  
<http://www.smallparts.com>

**Smith & Nephew**

11775 Starkey Road  
P.O. Box 1970  
Largo, FL 33779  
(800) 876-1261  
<http://www.smith-nephew.com>

**SmithKline Beecham**

1 Franklin Plaza, #1800  
Philadelphia, PA 19102  
(215) 751-4000 FAX: (215) 751-4992  
<http://www.sb.com>

**Solid Phase Sciences**

See Biosearch Technologies

**SOMA Scientific Instruments**

5319 University Drive, PMB #366  
Irvine, CA 92612  
(949) 854-0220 FAX: (949) 854-0223  
<http://somascientific.com>

**Somatix Therapy**

See Cell Genesys

**Sonics & Materials**

53 Church Hill Road  
Newtown, CT 06470  
(800) 745-1105 FAX: (203) 270-4610  
(203) 270-4600  
<http://www.sonicsandmaterials.com>

**Sonosep Biotech**

See Triton Environmental Consultants

**Sorvall**

See Kendro Laboratory Products

**Southern Biotechnology Associates**

P.O. Box 26221  
Birmingham, AL 35260  
(800) 722-2255 FAX: (205) 945-8768  
(205) 945-1774  
<http://SouthernBiotech.com>

**SPAFAS**

190 Route 165  
Preston, CT 06365  
(800) SPAFAS-1  
FAX: (860) 889-1991  
(860) 889-1389  
<http://www.spafas.com>

**Specialty Media**

Division of Cell & Molecular  
Technologies  
580 Marshall Street  
Phillipsburg, NJ 08865  
(800) 543-6029 FAX: (908) 387-1670  
(908) 454-7774  
<http://www.specialtymedia.com>

**Spectra Physics**

See Thermo Separation Products

**Spectramed**

See BOC Edwards

**SpectraSource Instruments**

31324 Via Colinas, Suite 114  
Westlake Village, CA 91362  
(818) 707-2655 FAX: (818) 707-9035  
<http://www.spectrasource.com>

**Spectronic Instruments**

820 Linden Avenue  
Rochester, NY 14625  
(800) 654-9955 FAX: (716) 248-4014  
(716) 248-4000  
<http://www.spectronic.com>

**Spectrum Medical Industries**

See Spectrum Laboratories

**Spectrum Laboratories**

18617 Broadwick Street  
Rancho Dominguez, CA 90220  
(800) 634-3300 FAX: (800) 445-7330  
(310) 885-4601 FAX: (310) 885-4666  
<http://www.spectrumlabs.com>

**Spherotech**

1840 Industrial Drive, Suite 270  
Libertyville, IL 60048  
(800) 368-0822 FAX: (847) 680-8927  
(847) 680-8922  
<http://www.spherotech.com>

**SPSS**

233 S. Wacker Drive, 11th floor  
Chicago, IL 60606  
(800) 521-1337 FAX: (800) 841-0064  
<http://www.spss.com>

**SS White Burs**

1145 Towbin Avenue  
Lakewood, NJ 08701  
(732) 905-1100 FAX: (732) 905-0987  
<http://www.sswiteburs.com>

**Stag Instruments**

16 Monument Industrial Park  
Chalgrove, Oxon OX44 7RW, UK  
(44) 1865-891116  
FAX: (44) 1865-890562

**Standard Reference Materials  
Program**

National Institute of Standards and  
Technology  
Building 202, Room 204  
Gaithersburg, MD 20899  
(301) 975-6776 FAX: (301) 948-3730

**Starna Cells**

P.O. Box 1919  
Atascadero, CA 93423  
(800) 228-4482 FAX: (805) 461-1575  
(805) 466-8855  
<http://www.starnacells.com>

**Starplex Scientific**

50 Steinway  
Etobicoke, Ontario  
M9W 6Y3 Canada  
(800) 665-0954 FAX: (416) 674-6067  
(416) 674-7474  
<http://www.starplexscientific.com>

**State Laboratory Institute of  
Massachusetts**

305 South Street  
Jamaica Plain, MA 02130  
(617) 522-3700 FAX: (617) 522-8735  
<http://www.state.ma.us/dph>

**Stedim Labs**

1910 Mark Court, Suite 110  
Concord, CA 94520  
(800) 914-6644 FAX: (925) 689-6988  
(925) 689-6650  
<http://www.stedim.com>

**Steinel America**

9051 Lyndale Avenue  
Bloomington, MN 55420  
(800) 852-4343 FAX: (952) 888-5132  
<http://www.steinela.com>

**Stem Cell Technologies**

777 West Broadway, Suite 808  
Vancouver, British Columbia  
V5Z 4J7 Canada  
(800) 667-0322 FAX: (800) 567-2899  
(604) 877-0713 FAX: (604) 877-0704  
<http://www.stemcell.com>

**Stephens Scientific**

107 Riverdale Road  
Riverdale, NJ 07457  
(800) 831-8099 FAX: (201) 831-8009  
(201) 831-9800

**Steraloids**

P.O. Box 689  
Newport, RI 02840  
(401) 848-5422 FAX: (401) 848-5638  
<http://www.steraloids.com>

**Sterling Medical**

2091 Springdale Road, Ste. 2  
Cherry Hill, NJ 08003  
(800) 229-0900 FAX: (800) 229-7854  
<http://www.sterlingmedical.com>

**Sterling Winthrop**

90 Park Avenue  
New York, NY 10016  
(212) 907-2000 FAX: (212) 907-3626

**Sternberger Monoclonals**

10 Burwood Court  
Lutherville, MD 21093  
(410) 821-8505 FAX: (410) 821-8506  
<http://www.sternbergermonoclonals.com>

**Stoelting**

502 Highway 67  
Kiel, WI 53042  
(920) 894-2293 FAX: (920) 894-7029  
<http://www.stoelting.com>

**Stoelting Company**

620 Wheat Lane  
Wood Dale, Illinois 60191  
(630) 860-9700 FAX: (630) 860-9775  
<http://www.stoeltingco.com>

**Stovall Lifescience**

206-G South Westgate Drive  
Greensboro, NC 27407  
(800) 852-0102 FAX: (336) 852-3507  
<http://www.sls-science.com>

**Stratagene**

11011 N. Torrey Pines Road  
La Jolla, CA 92037  
(800) 424-5444 FAX: (888) 267-4010  
(858) 535-5400  
<http://www.stratagene.com>

**Strategic Applications**

530A N. Milwaukee Avenue  
Libertyville, IL 60048  
(847) 680-9385 FAX: (847) 680-9837

**Strem Chemicals**

7 Mulliken Way  
Newburyport, MA 01950  
(800) 647-8736 FAX: (800) 517-8736  
(978) 462-3191 FAX: (978) 465-3104  
<http://www.strem.com>

**StressGen Biotechnologies**

Biochemicals Division  
120-4243 Glanford Avenue  
Victoria, British Columbia  
V8Z 4B9 Canada  
(800) 661-4978 FAX: (250) 744-2877  
(250) 744-2811  
<http://www.stressgen.com>

**Structure Probe/SPI Supplies**

(Epon-Araldite)  
P.O. Box 656  
West Chester, PA 19381  
(800) 242-4774 FAX: (610) 436-5755  
<http://www.2spi.com>

**Süd-Chemie Performance  
Packaging**

101 Christine Drive  
Belen, NM 87002  
(800) 989-3374 FAX: (505) 864-9296  
<http://www.uniteddesiccants.com>

**Sumitomo Chemical**

Sumitomo Building  
5-33, Kitahama 4-chome  
Chuo-ku, Osaka 541-8550, Japan  
(81) 6-6220-3891  
FAX: (81)-6-6220-3345  
<http://www.sumitomo-chem.co.jp>

**Sun Box**

19217 Orbit Drive  
Gaithersburg, MD 20879  
(800) 548-3968 FAX: (301) 977-2281  
(301) 869-5980  
<http://www.sunboxco.com>

**Sunbrokers**

See Sun International

**Sun International**

3700 Highway 421 North  
Wilmington, NC 28401  
(800) LAB-VIAL FAX: (800) 231-7861  
<http://www.autosamplervial.com>

**Sun Microsystems, Inc.**

4150 Network Circle  
Santa Clara, CA 95054  
(800) 555-98UN (650) 960-1300  
<http://www.sun.com>

**Sunox**

1111 Franklin Boulevard, Unit 6  
Cambridge, Ontario  
N1R 8B5 Canada  
(519) 624-4413 FAX: (519) 624-8378  
<http://www.sunox.ca>

**Supelco**

See Sigma-Aldrich

**SuperArray**

P.O. Box 34494  
Bethesda, MD 20827  
(888) 503-3187 FAX: (301) 765-9859  
(301) 765-9888  
<http://www.superarray.com>

**Surface Measurement Systems**

3 Warple Mews, Warple Way  
London W3 ORF, UK  
(44) 20-8749-4900  
FAX: (44) 20-8749-6749  
<http://www.smsuk.co.uk/index.htm>

**SurgiVet**

N7 W22025 Johnson Road, Suite A  
Waukesha, WI 53186  
(262) 513-8500 (888) 745-6562  
FAX: (262) 513-9069  
<http://www.surgivet.com>

**Sutter Instruments**

51 Digital Drive  
Novato, CA 94949  
(415) 883-0128 FAX: (415) 883-0572  
<http://www.sutter.com>

**Swiss Precision Instruments**

1555 Mittel Boulevard, Suite F  
Wooddale, IL 60191  
(800) 221-0198 FAX: (800) 842-5164

**Suppliers**

**Synaptosoft**

3098 Anderson Place  
Decatur, GA 30033  
(770) 939-4366 FAX: 770-939-9478  
<http://www.synaptosoft.com>

**SynChrom**

See Micra Scientific

**Synergy Software**

2457 Perkiomen Avenue  
Reading, PA 19606  
(800) 876-8376 FAX: (610) 370-0548  
(610) 779-0522  
<http://www.synergy.com>

**Synteni**

See Incyte

**Synthetics Industry**

Lumite Division  
2100A Atlantic Highway  
Gainesville, GA 30501  
(404) 532-9756 FAX: (404) 531-1347

**Systat**

See SPSS

**Systems Planning and Analysis (SPA)**

2000 N. Beaugard Street  
Suite 400  
Alexandria, VA 22311  
(703) 931-3500  
<http://www.spa-inc.net>

**3M Bioapplications**

3M Center  
Building 270-15-01  
St. Paul, MN 55144  
(800) 257-7459 FAX: (651) 737-5645  
(651) 736-4946

**T Cell Diagnostics and****T Cell Sciences**

38 Sidney Street  
Cambridge, MA 02139  
(617) 621-1400

**TAAB Laboratory Equipment**

3 Minerva House  
Calleva Park  
Aldermaston, Berkshire RG7 8NA, UK  
(44) 118 9817775  
FAX: (44) 118 9817881

**Taconic**

273 Hover Avenue  
Germantown, NY 12526  
(800) TAC-ONIC  
FAX: (518) 537-7287  
(518) 537-6208  
<http://www.taconic.com>

**Tago**

See Biosource International

**TaKaRa Biochemical**

719 Alliston Way  
Berkeley, CA 94710  
(800) 544-9899 FAX: (510) 649-8933  
(510) 649-9895  
<http://www.takara.co.jp/english>

**Takara Shuzo**

Biomedical Group Division  
Seta 3-4-1  
Otsu Shiga 520-21, Japan  
(81) 75-241-5100  
FAX: (81) 77-543-9254  
<http://www.Takara.co.jp/english>

**Takeda Chemical Products**

101 Takeda Drive  
Wilmington, NC 28401  
(800) 825-3328 FAX: (800) 825-0333  
(910) 762-8666 FAX: (910) 762-6846  
<http://takeda-usa.com>

**TAO Biomedical**

73 Manassas Court  
Laurel Springs, NJ 08021  
(609) 782-8622 FAX: (609) 782-8622

**Tecan US**

P.O. Box 13953  
Research Triangle Park, NC 27709  
(800) 33-TECAN  
FAX: (919) 361-5201  
(919) 361-5208  
<http://www.tecan-us.com>

**Techne**

University Park Plaza  
743 Alexander Road  
Princeton, NJ 08540  
(800) 225-9243 FAX: (609) 987-8177  
(609) 452-9275  
<http://www.technusa.com>

**Technical Manufacturing**

15 Centennial Drive  
Peabody, MA 01960  
(978) 532-6330 FAX: (978) 531-8682  
<http://www.techmfg.com>

**Technical Products International**

5918 Evergreen  
St. Louis, MO 63134  
(800) 729-4451 FAX: (314) 522-6360  
(314) 522-8671  
<http://www.vibratome.com>

**Technicon**

See Organon Teknika Cappel

**Techno-Aide**

P.O. Box 90763  
Nashville, TN 37209  
(800) 251-2629 FAX: (800) 554-6275  
(615) 350-7030  
<http://www.techno-aid.com>

**Ted Pella**

4595 Mountain Lakes Boulevard  
P.O. Box 492477  
Redding, CA 96049  
(800) 237-3526 FAX: (530) 243-3761  
(530) 243-2200  
<http://www.tedpella.com>

**TEGAM**

10 TEGAM Way  
Geneva, OH 44041  
(800) 666-1010 FAX: (440) 466-6110  
(440) 466-6100  
<http://www.tegam.com/>

**Tekmar-Dohrmann**

P.O. Box 429576  
Cincinnati, OH 45242  
(800) 543-4461 FAX: (800) 841-5262  
(513) 247-7000 FAX: (513) 247-7050

**Tektronix**

142000 S.W. Karl Braun Drive  
Beaverton, OR 97077  
(800) 621-1966 FAX: (503) 627-7995  
(503) 627-7999  
<http://www.tek.com>

**Tel-Test**

P.O. Box 1421  
Friendswood, TX 77546  
(800) 631-0600 FAX: (281) 482-1070  
(281) 482-2672  
<http://www.isotex-diag.com>

**TeleChem International**

524 East Weddell Drive, Suite 3  
Sunnyvale, CA 94089  
(408) 744-1331 FAX: (408) 744-1711  
<http://www.gst.net/~telechem>

**Terrachem**

Mallaustrasse 57  
D-68219 Mannheim, Germany  
0621-876797-0  
FAX: 0621-876797-19  
<http://www.terrachem.de>

**Terumo Medical**

2101 Cottontail Lane  
Somerset, NJ 08873  
(800) 283-7866 FAX: (732) 302-3083  
(732) 302-4900  
<http://www.terumomedical.com>

**Tetko**

333 South Highland Manor  
Briarcliff, NY 10510  
(800) 289-8385 FAX: (914) 941-1017  
(914) 941-7767  
<http://www.tetko.com>

**TetraLink**

4240 Ridge Lea Road  
Suite 29  
Amherst, NY 14226  
(800) 747-5170 FAX: (800) 747-5171  
<http://www.tetra-link.com>

**TEVA Pharmaceuticals USA**

1090 Horsham Road  
P.O. Box 1090  
North Wales, PA 19454  
(215) 591-3000 FAX: (215) 721-9669  
<http://www.tevapharmusa.com>

**Texas Fluorescence Labs**

9503 Capitol View Drive  
Austin, TX 78747  
(512) 280-5223 FAX: (512) 280-4997  
<http://www.teflabs.com>

**The Nest Group**

45 Valley Road  
Southborough, MA 01772  
(800) 347-6378 FAX: (508) 485-5736  
(508) 481-6223  
<http://world.std.com/~nestgrp>

**ThermoCare**

P.O. Box 6069  
Incline Village, NV 89450  
(800) 262-4020  
(775) 831-1201

**Thermo LabSystems**

8 East Forge Parkway  
Franklin, MA 02038  
(800) 522-7763 FAX: (508) 520-2229  
(508) 520-0009  
<http://www.finnpipette.com>

**Thermometric**

Spjutvagen 5A  
S-175 61 Jarfalla, Sweden  
(46) 8-564-72-200

**Thermoquest**

IEC Division  
300 Second Avenue  
Needham Heights, MA 02194  
(800) 843-1113 FAX: (781) 444-6743  
(781) 449-0800  
<http://www.thermoquest.com>

**Thermo Separation Products**

Thermoquest  
355 River Oaks Parkway  
San Jose, CA 95134  
(800) 538-7067 FAX: (408) 526-9810  
(408) 526-1100  
<http://www.thermoquest.com>

**Thermo Shandon**

171 Industry Drive  
Pittsburgh, PA 15275  
(800) 547-7429 FAX: (412) 899-4045  
<http://www.thermoshandon.com>

**Thermo Spectronic**

820 Linden Avenue  
Rochester, NY 14625  
(585) 248-4000 FAX: (585) 248-4200  
<http://www.thermo.com>

**Thomas Scientific**

99 High Hill Road at I-295  
Swedesboro, NJ 08085  
(800) 345-2100 FAX: (800) 345-5232  
(856) 467-2000 FAX: (856) 467-3087  
<http://www.wheatonsci.com/html/nt/Thomas.html>

**Suppliers**



**Thomson Instrument**

354 Tyler Road  
Clearbrook, VA 22624  
(800) 842-4752 FAX: (540) 667-6878  
(800) 541-4792 FAX: (760) 757-9367  
<http://www.hplc.com>

**Thorn EMI**

See Electron Tubes

**Thorlabs**

435 Route 206  
Newton, NJ 07860  
(973) 579-7227 FAX: (973) 383-8406  
<http://www.thorlabs.com>

**Tiemann**

See Bernsco Surgical Supply

**Timberline Instruments**

1880 South Flatiron Court, H-2  
P.O. Box 20356  
Boulder, CO 80308  
(800) 777-5996 FAX: (303) 440-8786  
(303) 440-8779  
<http://www.timberlineinstruments.com>

**Tissue-Tek**

A Division of Sakura Finetek USA  
1750 West 214th Street  
Torrance, CA 90501  
(800) 725-8723 FAX: (310) 972-7888  
(310) 972-7800  
<http://www.sakuraus.com>

**Tocris Cookson**

114 Holloway Road, Suite 200  
Ballwin, MO 63011  
(800) 421-3701 FAX: (800) 483-1993  
(636) 207-7651 FAX: (636) 207-7683  
<http://www.tocris.com>

**Tocris Cookson**

Northpoint, Fourth Way  
Avonmouth, Bristol BS11 8TA, UK  
(44) 117-982-6551  
FAX: (44) 117-982-6552  
<http://www.tocris.com>

**Tomtec**

See CraMar Technologies

**TopoGen**

P.O. Box 20607  
Columbus, OH 43220  
(800) TOPOGEN  
FAX: (800) ADD-TOPO  
(614) 451-5810 FAX: (614) 451-5811  
<http://www.topogen.com>

**Toray Industries, Japan**

Toray Building 2-1  
Nihonbash-Muromach  
2-Chome, Chuo-Ku  
Tokyo, Japan 103-8666  
(03) 3245-5115 FAX: (03) 3245-5555  
<http://www.toray.co.jp>

**Toray Industries, U.S.A.**

600 Third Avenue  
New York, NY 10016  
(212) 697-8150 FAX: (212) 972-4279  
<http://www.toray.com>

**Toronto Research Chemicals**

2 Brisbane Road  
North York, Ontario  
M3J 2J8, Canada  
(416) 665-9696 FAX: (416) 665-4439  
<http://www.trc-canada.com>

**TosoHaas**

156 Keystone Drive  
Montgomeryville, PA 18036  
(800) 366-4875 FAX: (215) 283-5035  
(215) 283-5000  
<http://www.tosohaas.com>

**Towhill**

647 Summer Street  
Boston, MA 02210  
(617) 542-6636 FAX: (617) 464-0804

**Toxin Technology**

7165 Curtiss Avenue  
Sarasota, FL 34231  
(941) 925-2032 FAX: (9413)  
925-2130  
<http://www.toxintechnology.com>

**Toyo Soda**

See TosoHaas

**Trace Analytical**

3517-A Edison Way  
Menlo Park, CA 94025  
(650) 364-6895 FAX: (650) 364-6897  
<http://www.traceanalytical.com>

**Transduction Laboratories**

See BD Transduction Laboratories

**Transgenomic**

2032 Concourse Drive  
San Jose, CA 95131  
(408) 432-3230 FAX: (408) 432-3231  
<http://www.transgenomic.com>

**Transonic Systems**

34 Dutch Mill Road  
Ithaca, NY 14850  
(800) 353-3569 FAX: (607) 257-7256  
<http://www.transonic.com>

**Travenol Lab**

See Baxter Healthcare

**Tree Star Software**

20 Winding Way  
San Carlos, CA 94070  
800-366-6045  
<http://www.treestar.com>

**Trevigen**

8405 Helgerman Court  
Gaithersburg, MD 20877  
(800) TREVIGEN  
FAX: (301) 216-2801  
(301) 216-2800  
<http://www.trevigen.com>

**Trilink Biotechnologies**

6310 Nancy Ridge Drive  
San Diego, CA 92121  
(800) 863-6801 FAX: (858) 546-0020  
<http://www.trilink.biotech.com>

**Triplos Associates**

1699 South Hanley Road, Suite 303  
St. Louis, MO 63144  
(800) 323-2960 FAX: (314) 647-9241  
(314) 647-1099  
<http://www.triplos.com>

**Triton Environmental Consultants**

120-13511 Commerce Parkway  
Richmond, British Columbia  
V6V 2L1 Canada  
(604) 279-2093 FAX: (604) 279-2047  
<http://www.triton-env.com>

**Tropix**

47 Wiggins Avenue  
Bedford, MA 01730  
(800) 542-2369 FAX: (617) 275-8581  
(617) 271-0045  
<http://www.tropix.com>

**TSE Systems, Inc.**

784 S. Poseyville Road  
Midland, Michigan 48640  
(866) 466-8873 FAX: (866) 467-8873  
(989) 698-3067 FAX: (989) 698-3068  
<http://www.tse-systems.com>

**TSI Center for Diagnostic Products**

See Intergen

**2000 Eppendorf-5 Prime**

5603 Arapahoe Avenue  
Boulder, CO 80303  
(800) 533-5703 FAX: (303) 440-0835  
(303) 440-3705

**Tyler Research**

10328 73rd Avenue  
Edmonton, Alberta  
T6E 6N5 Canada  
(403) 448-1249 FAX: (403) 433-0479

**UBI**

See Upstate Biotechnology

**Ugo Basile Biological Research Apparatus**

Via G. Borghi 43  
21025 Comerio, Varese, Italy  
(39) 332 744 574  
FAX: (39) 332 745 488  
<http://www.ugobasile.com>

**UltraPIX**

See Life Science Resources

**Ultrasonic Power**

239 East Stephenson Street  
Freeport, IL 61032  
(815) 235-6020 FAX: (815) 232-2150  
<http://www.upcorp.com>

**Ultra Sound Advice**

27 Merton Hall Road  
Wimbledon  
London SW19 3PR  
United Kingdom  
44-(0)-2082874614  
<http://www.ultrasoundadvice.co.uk>

**UNELKO**

14641 N. 74th Street  
Scottsdale, AZ 85260  
(480) 991-7272 FAX: (480) 483-7674  
<http://www.unelko.com>

**Unifab Corp.**

5260 Lovers Lane  
Kalamazoo, MI 49002  
(800) 648-9569 FAX: (616) 382-2825  
(616) 382-2803

**Union Carbide**

10235 West Little York Road, Suite 300  
Houston, TX 77040  
(800) 568-4000 FAX: (713) 849-7021  
(713) 849-7000  
<http://www.unioncarbide.com>

**United Desiccants**

See Süd-Chemie Performance  
Packaging

**United States Biochemical**

See USB

**United States Biological (US Biological)**

P.O. Box 261  
Swampscott, MA 01907  
(800) 520-3011 FAX: (781) 639-1768  
<http://www.usbio.net>

**Universal Imaging**

502 Brandywine Parkway  
West Chester, PA 19380  
(610) 344-9410 FAX: (610) 344-6515  
<http://www.image1.com>

**Upchurch Scientific**

619 West Oak Street  
P.O. Box 1529  
Oak Harbor, WA 98277  
(800) 426-0191 FAX: (800) 359-3460  
(360) 679-2528 FAX: (360) 679-3830  
<http://www.upchurch.com>

**Upjohn**

Pharmacia & Upjohn  
<http://www.pnu.com>

**Upstate Biotechnology (UBI)**

1100 Winter Street, Suite 2300  
Waltham, MA 02451  
(800) 233-3991 FAX: (781) 890-7738  
(781) 890-8845  
<http://www.upstatebiotech.com>

**Suppliers**

**USA/Scientific**

346 SW 57th Avenue  
P.O. Box 3565  
Ocala, FL 34478  
(800) LAB-TIPS FAX: (352) 351-2057  
(3524) 237-6288  
<http://www.usascientific.com>

**USB**

26111 Miles Road  
P.O. Box 22400  
Cleveland, OH 44122  
(800) 321-9322 FAX: (800) 535-0898  
FAX: (216) 464-5075  
<http://www.usbweb.com>

**USCI Bard**

Bard Interventional Products  
129 Concord Road  
Billerica, MA 01821  
(800) 225-1332 FAX: (978) 262-4805  
<http://www.bardinterventional.com>

**UVP (Ultraviolet Products)**

2066 W. 11th Street  
Upland, CA 91786  
(800) 452-6788 FAX: (909) 946-3597  
(909) 946-3197  
<http://www.uvp.com>

**V & P Scientific**

9823 Pacific Heights Boulevard,  
Suite T  
San Diego, CA 92121  
(800) 455-0644 FAX: (858) 455-0703  
(858) 455-0643  
<http://www.vp-scientific.com>

**Valco Instruments**

P.O. Box 55603  
Houston, TX 77255  
(800) FOR-VICI FAX: (713) 688-8106  
(713) 688-9345  
<http://www.vici.com>

**Valpey Fisher**

75 South Street  
Hopkin, MA 01748  
(508) 435-6831 FAX: (508) 435-5289  
<http://www.valpeyfisher.com>

**Value Plastics**

3325 Timberline Road  
Fort Collins, CO 80525  
(800) 404-LUER  
FAX: (970) 223-0953  
(970) 223-8306  
<http://www.valueplastics.com>

**Vanguard International**

P.O. Box 308  
3535 Rt. 66, Bldg. #4  
Neptune, NJ 07754  
(800) 922-0784 FAX: (732) 922-0557  
(732) 922-4900  
<http://www.vanguard1.com>

**Varian Analytical Instruments**

2700 Mitchell Drive  
Walnut Creek, CA 94598  
(800) 926-3000 FAX: (925) 945-2102  
(925) 939-2400  
<http://www.varianinc.com>

**Varian Associates**

3050 Hansen Way  
Palo Alto, CA 94304  
(800) 544-4636 FAX: (650) 424-5358  
(650) 493-4000  
<http://www.varian.com>

**Vector Core Laboratory/  
National Gene Vector Labs**

University of Michigan  
3560 E MSRB II  
1150 West Medical Center Drive  
Ann Arbor, MI 48109  
(734) 936-5843 FAX: (734) 764-3596

**Vector Laboratories**

30 Ingold Road  
Burlingame, CA 94010  
(800) 227-6666 FAX: (650) 697-0339  
(650) 697-3600  
<http://www.vectorlabs.com>

**Vedco**

2121 S.E. Bush Road  
St. Joseph, MO 64504  
(888) 708-3326 FAX: (816) 238-1837  
(816) 238-8840  
<http://database.vedco.com>

**Ventana Medical Systems**

3865 North Business Center Drive  
Tucson, AZ 85705  
(800) 227-2155 FAX: (520) 887-2558  
(520) 887-2155  
<http://www.ventanamed.com>

**Verity Software House**

P.O. Box 247  
45A Augusta Road  
Topsham, ME 04086  
(207) 729-6767 FAX: (207) 729-5443  
<http://www.vsh.com>

**Vernitron**

See Sensor Systems LLC

**Vertex Pharmaceuticals**

130 Waverly Street  
Cambridge, MA 02139  
(617) 577-6000 FAX: (617) 577-6680  
<http://www.vpharm.com>

**Vetamac**

Route 7, Box 208  
Frankfort, IN 46041  
(317) 379-3621

**Vet Drug**

Unit 8  
Lakeside Industrial Estate  
Colnbrook, Slough SL3 0ED, UK

**Vetus Animal Health**

See Burns Veterinary Supply

**Viamed**

15 Station Road  
Cross Hills, Keighley  
W. Yorkshire BD20 7DT, UK  
(44) 1-535-634-542  
FAX: (44) 1-535-635-582  
<http://www.viamed.co.uk>

**Vical**

9373 Town Center Drive, Suite 100  
San Diego, CA 92121  
(858) 646-1100 FAX: (858) 646-1150  
<http://www.vical.com>

**Victor Medical**

2349 North Watney Way, Suite D  
Fairfield, CA 94533  
(800) 888-8908 FAX: (707) 425-6459  
(707) 425-0294

**Virion Systems**

9610 Medical Center Drive, Suite 100  
Rockville, MD 20850  
(301) 309-1844 FAX: (301) 309-0471  
<http://www.radix.net/~virion>

**ViroGen**

200 Dexter Avenue  
Watertown, MA 02472 USA  
(617) 926-9167 FAX: (617) 926-9157  
<http://www.virogen.com>

**VirTis Company**

815 Route 208  
Gardiner, NY 12525  
(800) 765-6198 FAX: (914) 255-5338  
(914) 255-5000  
<http://www.virtis.com>

**Visible Genetics**

700 Bay Street, Suite 1000  
Toronto, Ontario  
M5G 1Z6 Canada  
(888) 463-6844 (416) 813-3272  
<http://www.visgen.com>

**Vitrocom**

8 Morris Avenue  
Mountain Lakes, NJ 07046  
(973) 402-1443 FAX: (973) 402-1445

**VTI**

7650 W. 26th Avenue  
Hialeah, FL 33106  
(305) 828-4700 FAX: (305) 828-0299  
<http://www.vticorp.com>

**VWR Scientific Products**

200 Center Square Road  
Bridgeport, NJ 08014  
(800) 932-5000 FAX: (609) 467-5499  
(609) 467-2600  
<http://www.vwrsp.com>

**Vydac**

17434 Mojave Street  
P.O. Box 867 Hesperia, CA 92345  
(800) 247-0924 FAX: (760) 244-1984  
(760) 244-6107  
<http://www.vydac.com>

**Vysis**

3100 Woodcreek Drive  
Downers Grove, IL 60515  
(800) 553-7042 FAX: (630) 271-7138  
(630) 271-7000  
<http://www.vysis.com>

**W&H Dentalwerk Bürmoos**

P.O. Box 1  
A-5111 Bürmoos, Austria  
(43) 6274-6236-0  
FAX: (43) 6274-6236-55  
<http://www.wnhdent.com>

**Wako BioProducts**

See Wako Chemicals USA

**Wako Chemicals USA**

1600 Bellwood Road  
Richmond, VA 23237  
(800) 992-9256 FAX: (804) 271-7791  
(804) 271-7677  
<http://www.wakousa.com>

**Wako Pure Chemicals**

1-2, Doshomachi 3-chome  
Chuo-ku, Osaka 540-8605, Japan  
81-6-6203-3741  
FAX: 81-6-6222-1203  
<http://www.wako-chem.co.jp/egaio/index.htm>

**Wallac**

See Perkin-Elmer

**Wallac**

A Division of Perkin-Elmer  
3985 Eastern Road  
Norton, OH 44203  
(800) 321-9632 FAX: (330) 825-8520  
(330) 825-4525  
<http://www.wallac.com>

**Waring Products**

283 Main Street  
New Hartford, CT 06057  
(800) 348-7195 FAX: (860) 738-9203  
(860) 379-0731  
<http://www.waringproducts.com>

**Warner Instrument**

1141 Dixwell Avenue  
Hamden, CT 06514  
(800) 599-4203 FAX: (203) 776-1278  
(203) 776-0664  
<http://www.warnerinstrument.com>

**Warner-Lambert**

Parke-Davis  
201 Tabor Road  
Morris Plains, NJ 07950  
(973) 540-2000 FAX: (973) 540-3761  
<http://www.warner-lambert.com>

**Washington University Machine Shop**

615 South Taylor  
St. Louis, MO 63310  
(314) 362-6186 FAX: (314) 362-6184

**Waters Chromatography**

34 Maple Street  
Milford, MA 01757  
(800) 252-HPLC  
FAX: (508) 478-1990  
(508) 478-2000  
<http://www.waters.com>

**Watlow**

12001 Lackland Road  
St. Louis, MO 63146 (314) 426-7431  
FAX: (314) 447-8770  
<http://www.watlow.com>

**Watson-Marlow**

220 Ballardvale Street  
Wilmington, MA 01887  
(978) 658-6168 FAX: (978) 988 0828  
<http://www.watson-marlow.co.uk>

**Waukesha Fluid Handling**

611 Sugar Creek Road  
Delavan, WI 53115  
(800) 252-5200 FAX: (800) 252-5012  
(414) 728-1900 FAX: (414) 728-4608  
<http://www.waukesha-cb.com>

**WaveMetrics**

P.O. Box 2088  
Lake Oswego, OR 97035  
(503) 620-3001 FAX: (503) 620-6754  
<http://www.wavemetrics.com>

**Weather Measure**

P.O. Box 41257  
Sacramento, CA 95641  
(916) 481-7565

**Weber Scientific**

2732 Kuser Road  
Hamilton, NJ 08691  
(800) FAT-TEST FAX: (609) 584-8388  
(609) 584-7677  
<http://www.weberscientific.com>

**Weck, Edward & Company**

1 Weck Drive  
Research Triangle Park, NC 27709  
(919) 544-8000

**Wellcome Diagnostics**

See Burroughs Wellcome

**Wellington Laboratories**

398 Laird Road  
Guelph Ontario  
N1G 3X7 Canada  
(800) 578-6985 FAX: (519) 822-2849  
<http://www.well-labs.com>

**Wesbart Engineering**

Daux Road  
Billingshurst, West Sussex  
RH14 9EZ, UK  
(44) 1-403-782738  
FAX: (44) 1-403-784180  
<http://www.wesbart.co.uk>

**Whatman**

9 Bridewell Place  
Clifton, NJ 07014  
(800) 631-7290 FAX: (973) 773-3991  
(973) 773-5800  
<http://www.whatman.com>

**Wheaton Science Products**

1501 North 10th Street  
Millville, NJ 08332  
(800) 225-1437 FAX: (800) 368-3108  
(856) 825-1100 FAX: (856) 825-1368  
<http://www.algroupwheaton.com>

**Whittaker Bioproducts**

See BioWhittaker

**Wild Heerbrugg**

Juerg Dedual Gaebriisstrasse 8 CH  
9056 Gais, Switzerland  
(41) 71-793-2723  
FAX: (41) 71-726-5957  
[http://www.homepage.swissonline.net/dedual/wild\\_heerbrugg](http://www.homepage.swissonline.net/dedual/wild_heerbrugg)

**Willy A. Bachofen**

**AG Maschinenfabrik**  
Utengasse 15/17  
CH4005 Basel, Switzerland  
(41) 61-681-5151  
FAX: (41) 61-681-5058  
<http://www.wab.ch>

**Winthrop**

See Sterling Winthrop

**Wolfram Research**

100 Trade Center Drive  
Champaign, IL 61820  
(800) 965-3726 FAX: (217) 398-0747  
(217) 398-0700  
<http://www.wolfram.com>

**World Health Organization**

Microbiology and Immunology Support  
20 Avenue Appia  
1211 Geneva 27, Switzerland  
(41-22) 791-2602  
FAX: (41-22) 791-0746  
<http://www.who.org>

**World Precision Instruments**

175 Sarasota Center Boulevard  
International Trade Center  
Sarasota, FL 34240  
(941) 371-1003 FAX: (941) 377-5428  
<http://www.wpiinc.com>

**Worthington Biochemical**

Halls Mill Road  
Freehold, NJ 07728  
(800) 445-9603 FAX: (800) 368-3108  
(732) 462-3838 FAX: (732) 308-4453  
<http://www.worthington-biochem.com>

**WPI**

See World Precision Instruments

**Wyeth-Ayerst**

2 Esterbrook Lane  
Cherry Hill, NJ 08003  
(800) 568-9938 FAX: (858) 424-8747  
(858) 424-3700

**Wyeth-Ayerst Laboratories**

P.O. Box 1773  
Paoli, PA 19301  
(800) 666-7248 FAX: (610) 889-9669  
(610) 644-8000  
<http://www.ahp.com>

**Xenotech**

3800 Cambridge Street  
Kansas City, KS 66103  
(913) 588-7930 FAX: (913) 588-7572  
<http://www.xenotechllc.com>

**Xeragon**

19300 Germantown Road  
Germantown, MD 20874  
(240) 686-7860 FAX: (240) 686-7861  
<http://www.xeragon.com>

**Xillix Technologies**

300-13775 Commerce Parkway  
Richmond, British Columbia  
V6V 2V4 Canada  
(800) 665-2236 FAX: (604) 278-3356  
(604) 278-5000  
<http://www.xillix.com>

**Xomed Surgical Products**

6743 Southpoint Drive N  
Jacksonville, FL 32216  
(800) 874-5797 FAX: (800) 678-3995  
(904) 296-9600 FAX: (904) 296-9666  
<http://www.xomed.com>

**Yakult Honsha**

1-19, Higashi-Shinbashi 1-chome  
Minato-ku Tokyo 105-8660, Japan  
81-3-3574-8960

**Yamasa Shoyu**

23-8 Nihonbashi Kakigaracho  
1-chome, Chuoku  
Tokyo, 103 Japan  
(81) 3-479 22 0095  
FAX: (81) 3-479 22 3435

**Yeast Genetic Stock Center**

See ATCC

**Yellow Spring Instruments**

See YSI

**YMC**

YMC Karasuma-Gojo Building  
284 Daigo-Cho, Karasuma Nishiirri  
Gojo-dori Shimogyo-ku  
Kyoto, 600-8106, Japan  
(81) 75-342-4567  
FAX: (81) 75-342-4568  
<http://www.ymc.co.jp>

**YSI**

1725-1700 Brannum Lane  
Yellow Springs, OH 45387  
(800) 765-9744 FAX: (937) 767-9353  
(937) 767-7241  
<http://www.ysi.com>

**Zeneca/CRB**

See AstraZeneca  
(800) 327-0125 FAX: (800) 321-4745

**Zenyth Therapeutics Limited**

ABN 37 006 614 375  
576 Swan Street  
Richmond, Victoria 3121, Australia  
(61) 3-9208-4000  
FAX: (61) 3-9208-4350  
<http://www.zenyth.com.au>

**Zivic-Miller Laboratories**

178 Toll Gate Road  
Zelienople, PA 16063  
(800) 422-LABS FAX: (724) 452-4506  
(800) MBM-RATS  
FAX: (724) 452-5200  
<http://zivicmiller.com>

**ZYF Pharm Chemical Shanghai**

Lansheng Corp. China  
Shanghai, China  
(86) 21 65365517  
FAX: (86) 21-65612897  
[www.pharmchemical.com](http://www.pharmchemical.com)

**Zymark**

Zymark Center  
Hopkinton, MA 01748  
(508) 435-9500 FAX: (508) 435-3439  
<http://www.zymark.com>

**Zymed Laboratories**

458 Carlton Court  
South San Francisco, CA 94080  
(800) 874-4494 FAX: (650) 871-4499  
(650) 871-4494  
<http://www.zymed.com>

**Zymo Research**

625 W. Katella Avenue, Suite 30  
Orange, CA 92867  
(888) 882-9682 FAX: (714) 288-9643  
(714) 288-9682  
<http://www.zymor.com>

**Zynaxis Cell Science**

See ChiRex Cauldron
